# Supplementary material for: Reaction of tetracyanoethylene with diselenium dichloride: a route to pyrrolo[2,3-c][1,2,6]selenadiazines
Source: Royal Society of Chemistry journal article supplement (doi:10.1039/d3nj04876d), 2023-12-13
Supplement: d3nj04876d1.pdf [file d3nj04876d1.pdf]

**Supporting Information for**

**Reaction of tetracyanoethylene with diselenium dichloride: A route to pyrrolo[2,3-*c*]-  
[1,2,6]selenodiazines**

Cory Laurent, Andreas Kourtellaris and Panayiotis A. Koutentis\*

Department of Chemistry, University of Cyprus, P.O. Box 20537, 1678 Nicosia, Cyprus

\*e-mail: koutenti@ucy.ac.cy

## Contents

|           |                                       |            |
|-----------|---------------------------------------|------------|
| <b>S1</b> | <b>Computational Section</b>          | <b>S3</b>  |
| <b>S2</b> | <b>X-Ray Crystallographic Studies</b> | <b>S9</b>  |
| <b>S3</b> | <b>Experimental Section</b>           | <b>S25</b> |
| <b>S4</b> | <b>NMR Spectra</b>                    | <b>S43</b> |

## S1 Computational Section

### S1.1 General methods

The geometry of the singlet ground state of 4,6-dichloropyrrolo[2,3-*c*][1,2,6]selenadiazine-5-carbonitrile (**12**) was fully optimized and analytical second derivatives were computed using vibrational analysis to confirm each stationary point to be a minimum by yielding zero imaginary frequencies. Close-shell singlet ground states were examined using the spin polarized density functional theory (RDFT). The hybrid B3LYP method,<sup>1</sup> utilizing the 6-311G+(2d,p) basis set was employed for all calculations. HOMO and LUMO energies were taken directly from the optimization calculations. NICS values (in ppm) were measured at the RB3LYP/6-311G+G(2d,p) level of theory in the plane [NICS(0)] above [NICS(1), NICS(2), NICS(3)] and below [NICS(-1), NICS(-2), NICS(-3)] the plane at the center of each ring to estimate the local currents for each individual ring. While NICS(0) are often affected by the  $\sigma$  electrons of neighboring bonds, the most accurate NICS values [NICS(1) and NICS(-1)] are the ones measured 1 Å above and below the molecular plane where  $\pi$  electron density is mainly situated.<sup>2</sup> All the above computations were performed using the Gaussian 09 suite of programs.<sup>3,4</sup>

**Table S1.** Summary of Computational Energies and Properties.

| Dichloro <b>12</b> |                |
|--------------------|----------------|
| $E_s$ (eV)         | -102578.623542 |
| $\mu_s$ (D)        | 3.9999         |
| LUMO (eV)          | -4.2461        |
| HOMO (eV)          | -7.5267        |

**Table S2.** NICS(0), (1/-1), (2/-2) and (3/-3) for pyrrole and selenadiazine rings of 4,6-dichloropyrrolo[2,3-*c*][1,2,6]selenadiazine-5-carbonitrile (**12**) calculated at the RB3LYP/6-311G+G(2d,p) level of theory.

| Ring         | Pyrrolo | Selenadiazine |
|--------------|---------|---------------|
| NICS(0)      | -7.7    | -6.0          |
| NICS(1)/(-1) | -9.4    | -6.8          |
| NICS(2)/(-2) | -3.8    | -3.7          |
| NICS(3)/(-3) | -1.7    | -1.8          |

## S1.2 Molecular orbitals

**Figure S1.** Molecular orbitals of the singlet ground state of 4,6-dichloropyrrolo[2,3-*c*][1,2,6]-selenadiazine-5-carbonitrile (**12**) as calculated at the RB3LYP/6-311G+G(2d,p) level of theory.

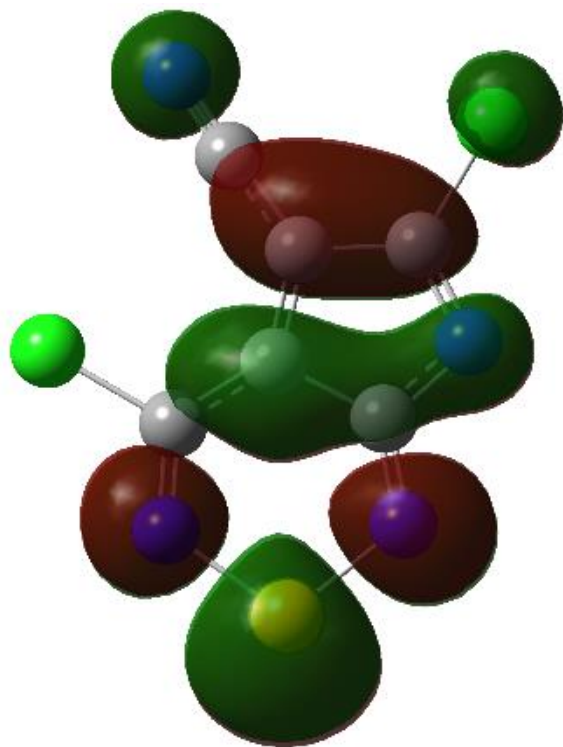

LUMO ( $E = -4.2461$  eV)

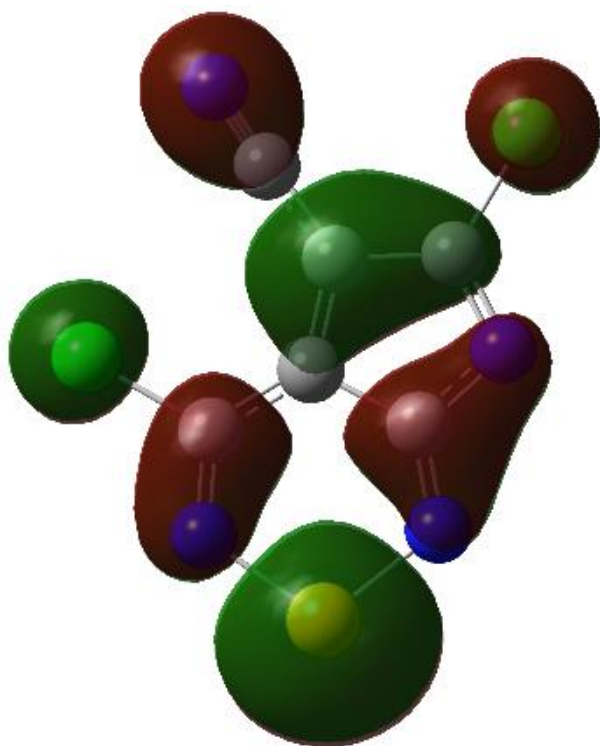

HOMO ( $E = -7.5267$  eV)



### S1.3 Electrostatic potential maps (ESP)

**Figure S2.** ESP of the singlet ground state of 4,6-dichloropyrrolo[2,3-*c*][1,2,6]selenadiazine-5-carbonitrile (**12**) as calculated at the RB3LYP/6-311G+G(2d,p) level of theory. Isovalue = 0.004.

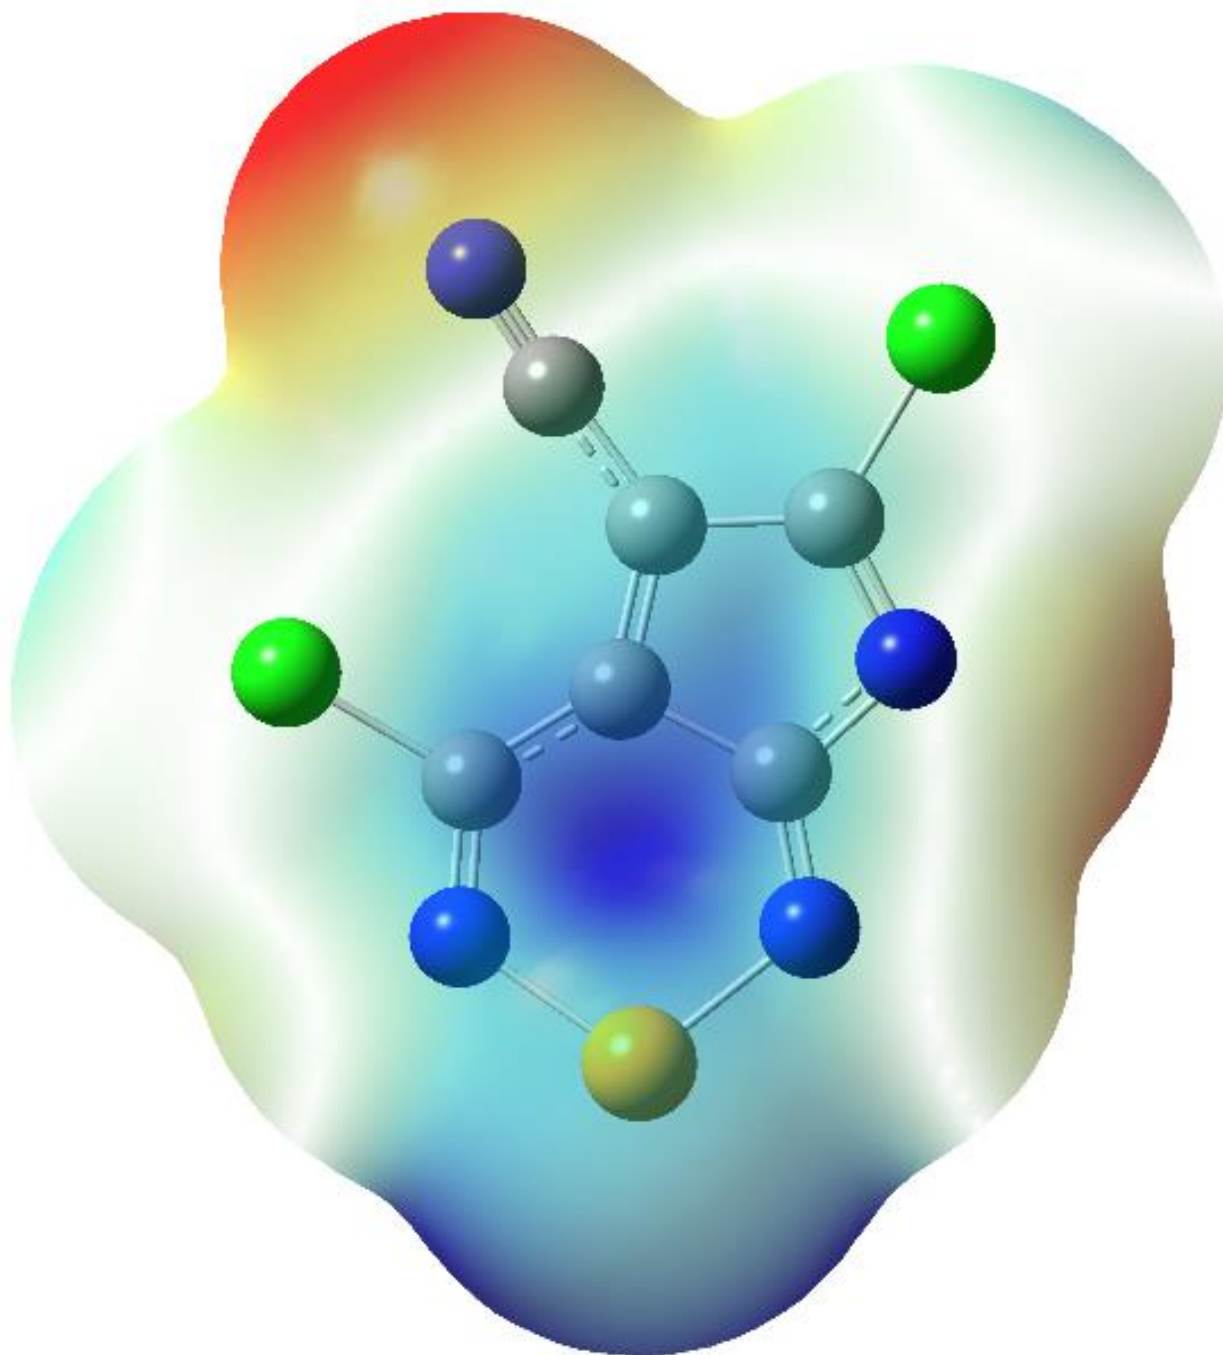

### S1.4 Mulliken charges and dipole vectors

**Figure S3.** Mulliken charges and dipole vector of the singlet ground state of 4,6-dichloropyrrolo[2,3-*c*]-[1,2,6]selenadiazine-5-carbonitrile (**12**) as calculated at the RB3LYP/6-311G+G(2d,p) level of theory.

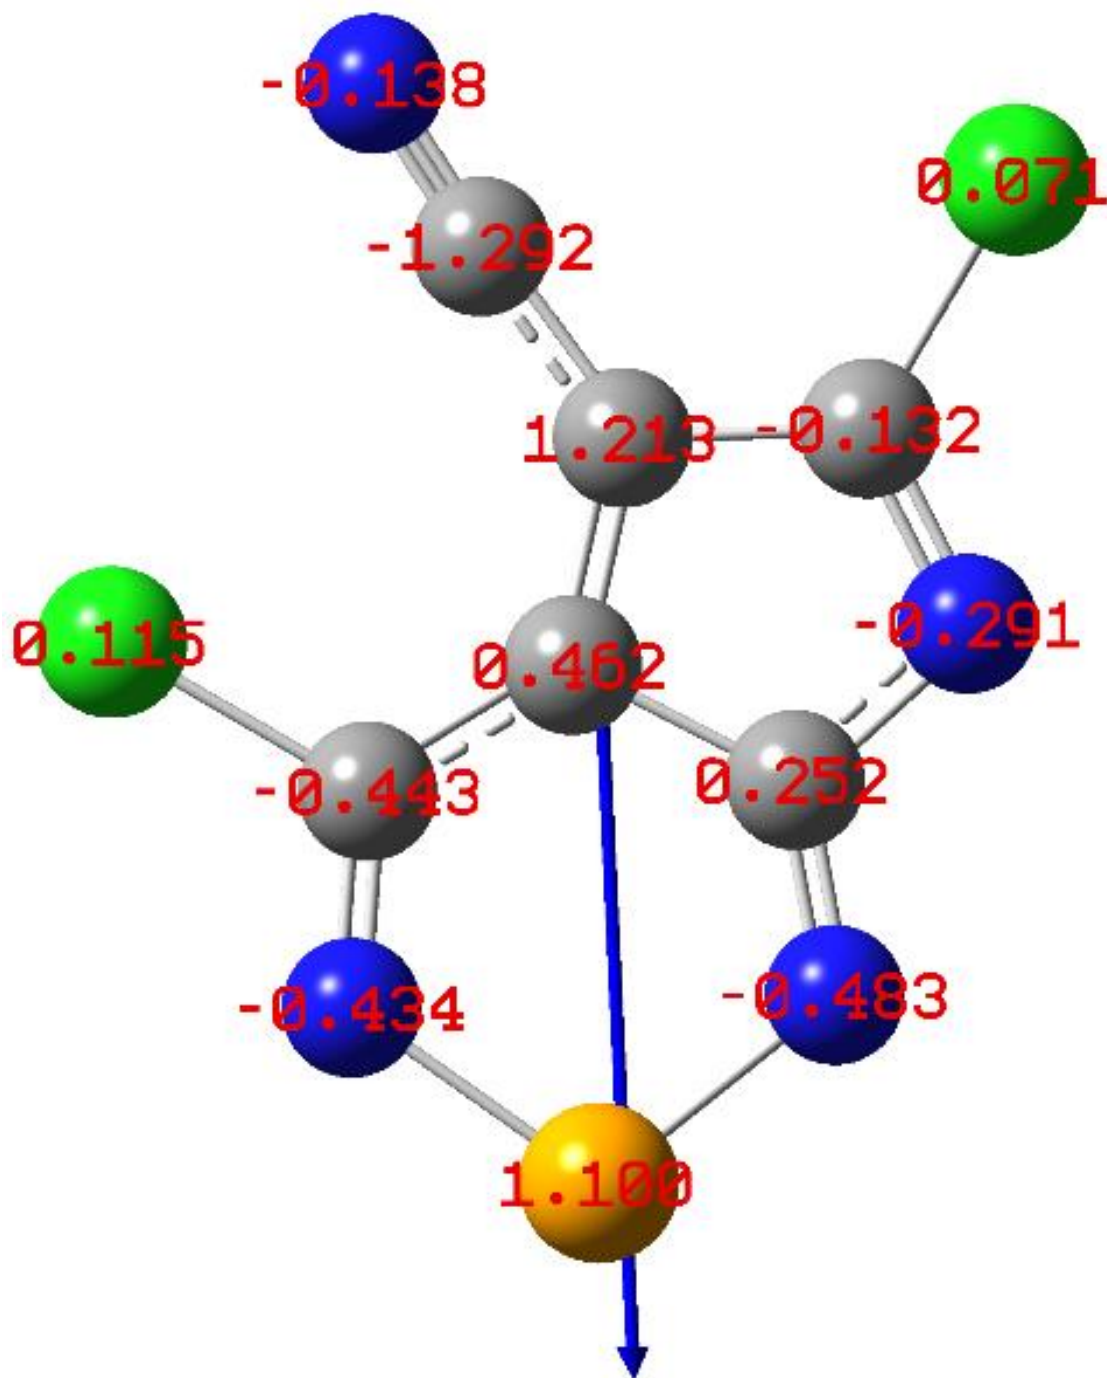

$$\mu = 3.999 \text{ D}$$

## S1.5 Atom coordinates

**Table S3.** Atom coordinates of the singlet ground state of 4,6-dichloropyrrolo[2,3-*c*][1,2,6]selenadiazine-5-carbonitrile (**12**) as calculated at the RB3LYP/6-311G+G(2d,p) level of theory.

|        |            |            |            |
|--------|------------|------------|------------|
| C(1)   | 0.1043081  | -1.2191611 | -0.0001832 |
| C(2)   | 0.8649930  | 1.1998391  | 0.0002398  |
| C(3)   | -0.1877140 | 0.2374940  | 0.0001238  |
| C(4)   | -1.5634551 | 0.3207779  | -0.0000442 |
| C(5)   | -2.0174460 | -1.0644463 | 0.0003158  |
| C(6)   | -2.4237413 | 1.4421889  | -0.0000732 |
| Cl(7)  | 0.4332328  | 2.9003232  | 0.0002368  |
| N(8)   | 1.2641893  | -1.7966711 | -0.0002922 |
| N(9)   | 2.1247321  | 0.9372872  | 0.0000808  |
| N(10)  | -3.1755604 | 2.3169769  | 0.0000028  |
| Se(11) | 2.7186553  | -0.7605849 | -0.0001752 |
| N(12)  | -1.0672759 | -1.9490523 | -0.0000762 |
| Cl(13) | -3.6755001 | -1.5003264 | 0.0000968  |

## S1.6 Section references

1. (a) Becke, A. D. *J. Chem. Phys.* **1993**, *98*, 5648; (b) Lee, C. T.; Yang, W. T.; Parr, R. G. *Phys. Rev. B* **1988**, *37*, 785.
2. Schleyer, P. v. R.; Manoharan, M.; Wang, Z.-X.; Kiran, B.; Jiao, H.; Puchta, R.; van Eikema Hommes, N. J. R. *Org. Lett.* **2001**, *3*, 2465.
3. Gaussian 09, Revision C.01, Frisch, M. J.; Trucks, G. W.; Schlegel, H. B.; Scuseria, G. E.; Robb, M. A.; Cheeseman, J. R.; Scalmani, G.; Barone, V.; Mennucci, B.; Petersson, G. A.; Nakatsuji, H.; Caricato, M.; Li, X.; Hratchian, H. P.; Izmaylov, A. F.; Bloino, J.; Zheng, G.; Sonnenberg, J. L.; Hada, M.; Ehara, M.; Toyota, K.; Fukuda, R.; Hasegawa, J.; Ishida, M.; Nakajima, T.; Honda, Y.; Kitao, O.; Nakai, H.; Vreven, T.; Montgomery, Jr., J. A.; Peralta, J.E.; Ogliaro, F.; Bearpark, M.; Heyd, J. J.; Brothers, E.; Kudin, K. N.; Staroverov, V. N.; Keith, T.; Kobayashi, R.; Normand, J.; Raghavachari, K.; Rendell, A.; Burant, J. C.; Iyengar, S. S.; Tomasi, J.; Cossi, M.; Rega, N.; Millam, J. M.; Klene, M.; Knox, J. E.; Cross, J. B.; Bakken, V.; Adamo, C.; Jaramillo, J.; Gomperts, R.; Stratmann, R. E.; Yazyev, O.; Austin, A. J.; Cammi, R.; Pomelli, C.; Ochterski, J. W.; Martin,

R. L.; Morokuma, K.; Zakrzewski, V. G.; Voth, G. A.; Salvador, P.; Dannenberg, J. J.; Dapprich, S.; Daniels, A. D.; Farkas, O.; Foresman, J. B.; Ortiz, J. V.; Cioslowski, J. and Fox, D. J., Gaussian, Inc., Wallingford CT, 2010.

4. Foresman, J. B.; Frisch,  $\text{\AA}$ ., Exploring Chemistry with Electronic Structure Methods, 2nd Edition, 1996, Gaussian Inc., Pittsburgh, PA, USA. ISBN: 978-0-9636769-3-1.

## S2 X-Ray Crystallographic Studies

### S2.1 X-Ray crystallographic method

Data for compounds **12**, **13**, and **26** were collected on a Oxford-Diffraction Supernova diffractometer, equipped with a CCD area detector utilizing Cu K $\alpha$  radiation ( $\lambda = 1.5418 \text{ \AA}$ ) for **12** and **26**, and Mo K $\alpha$  ( $\lambda = 0.71073 \text{ \AA}$ ) for **13**. Data for compounds **15**, **33-35** were collected on a XtaLAB Synergy, Single source at home/near, HyPix diffractometer equipped with a CCD area detector utilizing Cu-K $\alpha$  radiation ( $\lambda = 1.5418 \text{ \AA}$ ). Suitable crystals were attached to glass fibers using paratone-*N* oil and transferred to a goniostat where they were cooled for data collection. Unit cell dimensions were determined and refined. Empirical absorption corrections (multi-scan based on symmetry-related measurements) were applied using CrysAlis RED software.<sup>1</sup> The structures **12**, **13**, and **26** were solved by direct method and refined on  $F^2$  using full-matrix least squares using SHELXL97.<sup>2</sup> Software packages used: CrysAlis CCD<sup>1</sup> for data collection, CrysAlis<sup>1</sup> for cell refinement and data reduction, WINGX for geometric calculations,<sup>3</sup> and DIAMOND<sup>4</sup> for molecular graphics. Structures **15**, **33-35** were solved using Olex2,<sup>5</sup> the structure was solved with the olex2.solve<sup>6</sup> structure solution program using Charge Flipping and refined with the SHELXL<sup>7</sup> refinement package using Least Squares minimization. The non-H atoms were treated anisotropically. The hydrogen atoms were placed in calculated, ideal positions and refined as riding on their respective carbon atoms.

Crystallographic data for **12**, **13**, **15**, **26**, **33**, **34** and **35** have been deposited with the Cambridge Crystallographic Data Centre with deposit numbers CCDC-2288302, 2288308, 2288303, 2288307, 2288305, 2288304 and 2288306, respectively. The data can be obtained free of charge via [www.ccdc.cam.ac.uk/data\\_request/cif](http://www.ccdc.cam.ac.uk/data_request/cif) (or from the Cambridge Crystallographic Data Centre, 12 Union Road, Cambridge CB2 1EZ, UK; fax: +44 1223 336033; or e-mail: [deposit@ccdc.cam.ac.uk](mailto:deposit@ccdc.cam.ac.uk)).

### S2.1.1 X-Ray crystallographic studies of 4,6-dichloropyrrolo[2,3-*c*][1,2,6]selenadiazine-5-carbonitrile (12)

**Table S4.** Crystal refinement data for 4,6-dichloropyrrolo[2,3-*c*][1,2,6]selenadiazine-5-carbonitrile (12)

|                                         |                                                                                                                                                                       |
|-----------------------------------------|-----------------------------------------------------------------------------------------------------------------------------------------------------------------------|
| Empirical formula                       | C <sub>6</sub> Cl <sub>2</sub> N <sub>4</sub> Se                                                                                                                      |
| Formula weight                          | 277.96                                                                                                                                                                |
| Temperature                             | 100(2) K                                                                                                                                                              |
| Radiation                               | Cu K $\alpha$ ( $\lambda = 1.54184 \text{ \AA}$ )                                                                                                                     |
| Crystal system                          | Monoclinic                                                                                                                                                            |
| Space group                             | P2 <sub>1</sub> /n                                                                                                                                                    |
| Unit cell dimensions                    | $a = 10.7340(13) \text{ \AA}$ , $\alpha = 90^\circ$<br>$b = 5.6415(3) \text{ \AA}$ , $\beta = 93.775(9)^\circ$<br>$c = 13.8208(14) \text{ \AA}$ , $\gamma = 90^\circ$ |
| Volume                                  | 835.11(14) $\text{\AA}^3$                                                                                                                                             |
| Z                                       | 4                                                                                                                                                                     |
| Density (calculated)                    | 2.211 g/cm <sup>3</sup>                                                                                                                                               |
| Absorption coefficient                  | 11.597 mm <sup>-1</sup>                                                                                                                                               |
| F(000)                                  | 528                                                                                                                                                                   |
| Crystal size                            | 0.09 $\times$ 0.07 $\times$ 0.01 mm <sup>3</sup>                                                                                                                      |
| $\theta$ range for data collection      | 5.059 to 71.778 $^\circ$                                                                                                                                              |
| Index ranges                            | -13 $\leq$ h $\leq$ 12, -6 $\leq$ k $\leq$ 4, -16 $\leq$ l $\leq$ 16                                                                                                  |
| Reflections collected                   | 2662                                                                                                                                                                  |
| Independent reflections                 | 1589 [R <sub>int</sub> = 0.0360]                                                                                                                                      |
| Completeness to $\theta = 67.684^\circ$ | 99.7%                                                                                                                                                                 |
| Refinement method                       | Full-matrix least-squares on F <sup>2</sup>                                                                                                                           |
| Data / restraints / parameters          | 1589 / 0 / 118                                                                                                                                                        |
| Goodness-of-fit                         | 1.083                                                                                                                                                                 |
| Final R indices [I > 2 $\sigma$ (I)]    | R <sub>obs</sub> = 0.0629, wR <sub>obs</sub> = 0.1810                                                                                                                 |
| R indices [all data]                    | R <sub>all</sub> = 0.0645, wR <sub>all</sub> = 0.1858                                                                                                                 |
| Extinction coefficient                  | .                                                                                                                                                                     |
| Largest diff. peak and hole             | 2.437 and -1.409 e $\cdot$ $\text{\AA}^{-3}$                                                                                                                          |

$$R = \frac{\sum ||F_o| - |F_c||}{\sum |F_o|}, wR = \left\{ \frac{\sum [w(|F_o|^2 - |F_c|^2)^2]}{\sum [w(|F_o|^4)]} \right\}^{1/2} \text{ and } w = 1/[\sigma^2(F_o^2) + (0.1496P)^2 + 0.4017P]$$

where  $P = (F_o^2 + 2F_c^2)/3$



### S2.1.2 X-Ray crystallographic studies of 4-chloro-6-oxo-6,7-dihydropyrrolo[2,3-c][1,2,6]selenadiazine-5-carbonitrile (13)

**Table S5.** Crystal refinement data for 4-chloro-6-oxo-6,7-dihydropyrrolo[2,3-c][1,2,6]selenadiazine-5-carbonitrile (13)

|                                         |                                                                                                                                                     |
|-----------------------------------------|-----------------------------------------------------------------------------------------------------------------------------------------------------|
| Empirical formula                       | C <sub>6</sub> ClN <sub>4</sub> OSe                                                                                                                 |
| Formula weight                          | 258.51                                                                                                                                              |
| Temperature                             | 100(2) K                                                                                                                                            |
| Radiation                               | Mo K $\alpha$ ( $\lambda = 0.71073$ Å)                                                                                                              |
| Crystal system                          | triclinic                                                                                                                                           |
| Space group                             | P-1                                                                                                                                                 |
| Unit cell dimensions                    | $a = 5.8205(6)$ Å, $\alpha = 66.940(10)^\circ$<br>$b = 11.1537(12)$ Å, $\beta = 88.468(8)^\circ$<br>$c = 13.4660(13)$ Å, $\gamma = 82.098(9)^\circ$ |
| Volume                                  | 796.37(15) Å <sup>3</sup>                                                                                                                           |
| Z                                       | 4                                                                                                                                                   |
| Density (calculated)                    | 2.156 g/cm <sup>3</sup>                                                                                                                             |
| Absorption coefficient                  | 5.007 mm <sup>-1</sup>                                                                                                                              |
| F(000)                                  | 492                                                                                                                                                 |
| Crystal size                            | 0.07 × 0.05 × 0.02 mm <sup>3</sup>                                                                                                                  |
| $\theta$ range for data collection      | 3.290 to 29.646°                                                                                                                                    |
| Index ranges                            | -7 ≤ h ≤ 7, -15 ≤ k ≤ 14, -17 ≤ l ≤ 16                                                                                                              |
| Reflections collected                   | 6459                                                                                                                                                |
| Independent reflections                 | 3745 [R <sub>int</sub> = 0.0385]                                                                                                                    |
| Completeness to $\theta = 25.242^\circ$ | 99.8%                                                                                                                                               |
| Refinement method                       | Full-matrix least-squares on F <sup>2</sup>                                                                                                         |
| Data / restraints / parameters          | 3745 / 0 / 235                                                                                                                                      |
| Goodness-of-fit                         | 1.060                                                                                                                                               |
| Final R indices [I > 2 $\sigma$ (I)]    | R <sub>obs</sub> = 0.0474, wR <sub>obs</sub> = 0.1002                                                                                               |
| R indices [all data]                    | R <sub>all</sub> = 0.0770, wR <sub>all</sub> = 0.1175                                                                                               |
| Extinction coefficient                  | .                                                                                                                                                   |
| Largest diff. peak and hole             | 1.249 and -0.973 e <sup>-</sup> Å <sup>-3</sup>                                                                                                     |

$$R = \frac{\sum ||F_o| - |F_c||}{\sum |F_o|}, wR = \left\{ \frac{\sum [w(|F_o|^2 - |F_c|^2)^2]}{\sum [w(|F_o|^4)]} \right\}^{1/2} \text{ and } w = 1 / [\sigma^2(F_o^2) + (0.0439P)^2 + 0.0423P]$$

where  $P = (F_o^2 + 2F_c^2) / 3$



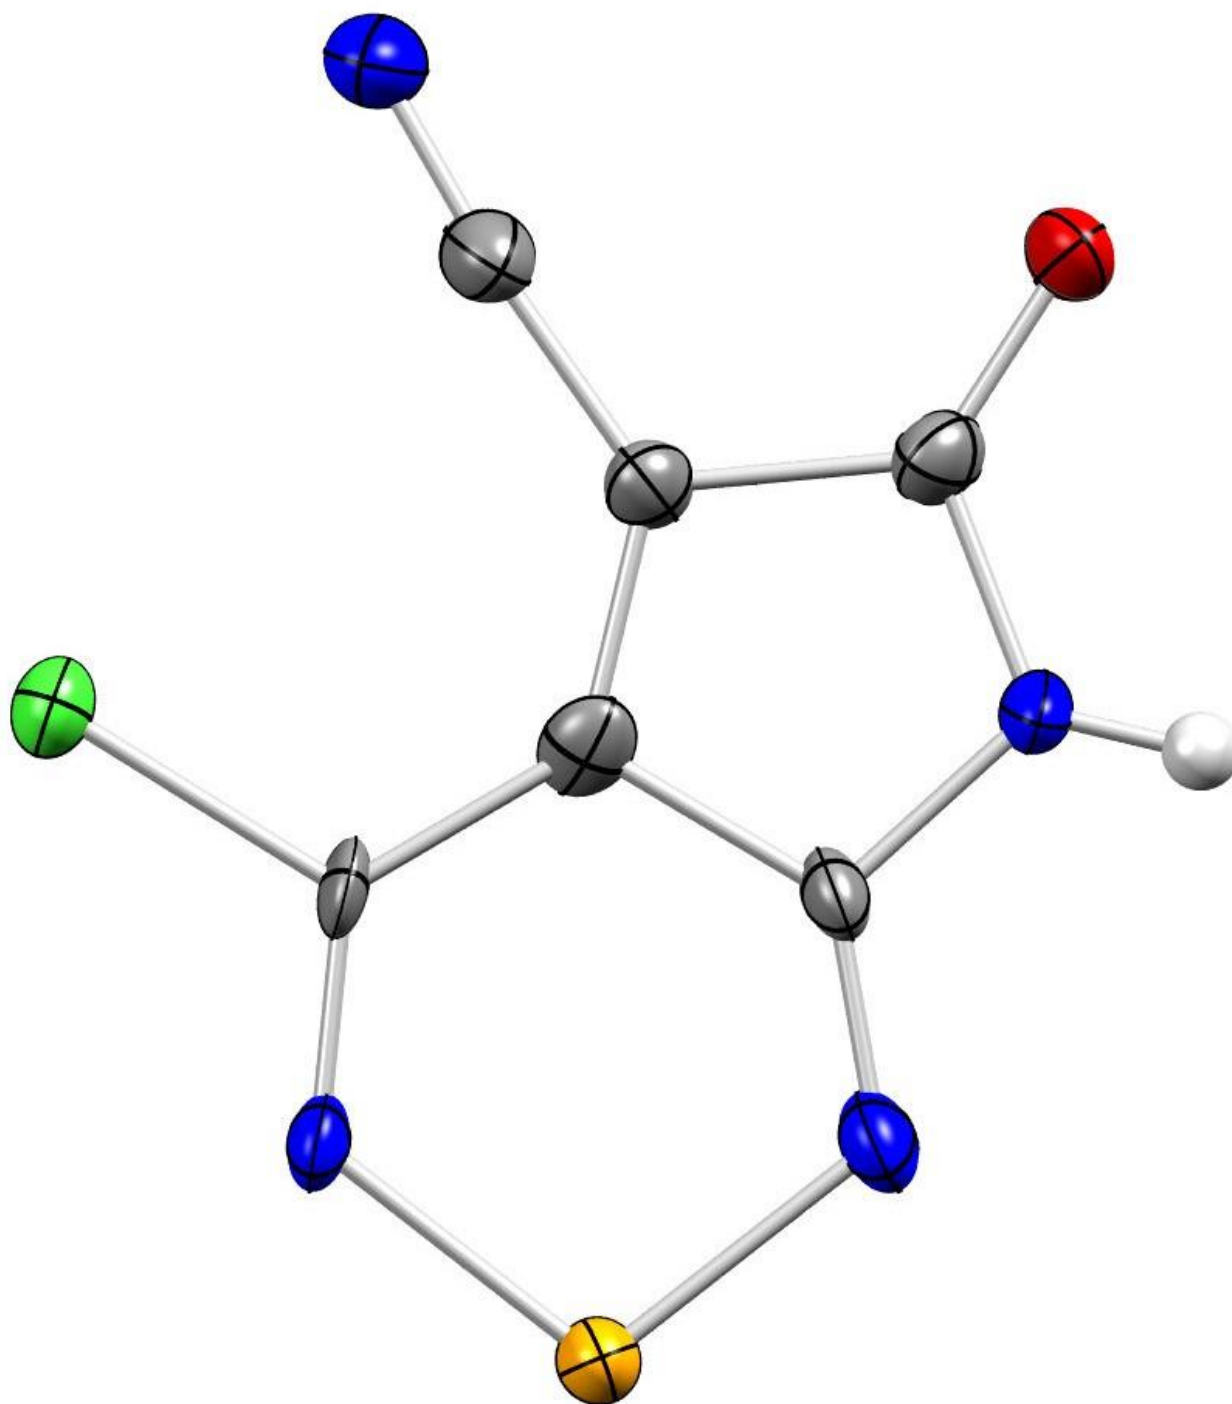

**Figure S5.** ORTEP view of 4-chloro-6-oxo-6,7-dihydropyrrolo[2,3-*c*][1,2,6]selenadiazine-5-carbonitrile (**13**). 50% Probability ellipsoids.

### S2.1.3 X-Ray crystallographic studies of 4-chloro-6-phenoxy pyrrolo[2,3-c][1,2,6]selenadiazine-5-carbonitrile (15)

**Table S6.** Crystal refinement data for 4-chloro-6-phenoxy pyrrolo[2,3-c][1,2,6]selenadiazine-5-carbonitrile (15)

|                                                       |                                                                              |
|-------------------------------------------------------|------------------------------------------------------------------------------|
| Empirical formula                                     | C <sub>12</sub> H <sub>5</sub> ClN <sub>4</sub> OSe                          |
| Formula weight                                        | 335.61                                                                       |
| Temperature                                           | 179.99(10) K                                                                 |
| Crystal system                                        | monoclinic                                                                   |
| Space group                                           | P2 <sub>1</sub> /n                                                           |
| <i>a</i> /Å                                           | 5.01700(8)                                                                   |
| <i>b</i> /Å                                           | 8.67188(13)                                                                  |
| <i>c</i> /Å                                           | 27.5955(4)                                                                   |
| $\alpha$ /°                                           | 90                                                                           |
| $\beta$ /°                                            | 90.8291(15)                                                                  |
| $\gamma$ /°                                           | 90                                                                           |
| Volume/Å <sup>3</sup>                                 | 1200.47(3)                                                                   |
| Z                                                     | 4                                                                            |
| $\rho_{\text{calc}}$ /cm <sup>3</sup>                 | 1.857                                                                        |
| $\mu$ /mm <sup>-1</sup>                               | 6.270                                                                        |
| F(000)                                                | 656.0                                                                        |
| Crystal size/mm <sup>3</sup>                          | 0.7 × 0.5 × 0.2                                                              |
| Radiation                                             | Cu K $\alpha$ ( $\lambda$ = 1.54184 Å)                                       |
| 2 $\Theta$ range for data collection/°                | 6.406 to 153.496                                                             |
| Index ranges                                          | -6 ≤ <i>h</i> ≤ 5, -10 ≤ <i>k</i> ≤ 10, -34 ≤ <i>l</i> ≤ 33                  |
| Reflections collected                                 | 13273                                                                        |
| Independent reflections                               | 2470 [ <i>R</i> <sub>int</sub> = 0.0378, <i>R</i> <sub>sigma</sub> = 0.0253] |
| Data/restraints/parameters                            | 2470/0/173                                                                   |
| Goodness-of-fit on F <sup>2</sup>                     | 1.058                                                                        |
| Final R indexes [ <i>I</i> ≥ 2 $\sigma$ ( <i>I</i> )] | <i>R</i> <sub>1</sub> = 0.0214, <i>wR</i> <sub>2</sub> = 0.0521              |
| Final R indexes [all data]                            | <i>R</i> <sub>1</sub> = 0.0231, <i>wR</i> <sub>2</sub> = 0.0528              |
| Largest diff. peak/hole / e Å <sup>-3</sup>           | 0.35/-0.26                                                                   |

$$R = \frac{\sum ||F_o| - |F_c||}{\sum |F_o|}, wR = \left\{ \frac{\sum [w(|F_o|^2 - |F_c|^2)^2]}{\sum [w(|F_o|^4)]} \right\}^{1/2} \text{ and } w = 1/[\sigma^2(F_o^2) + (0.0439P)^2 + 0.0423P]$$

$$\text{where } P = (F_o^2 + 2F_c^2)/3$$

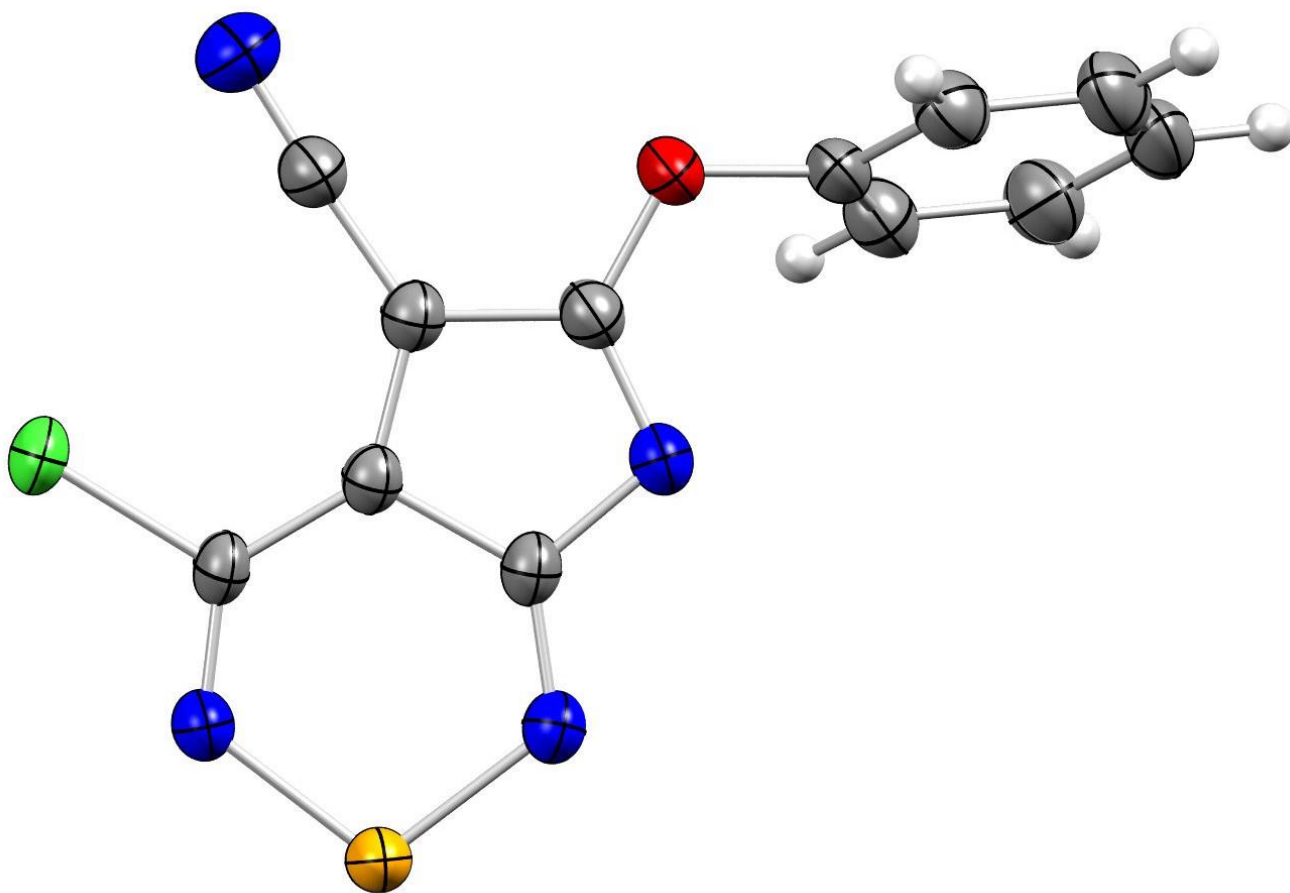

**Figure S6.** ORTEP view of 4-chloro-6-phenoxyppyrolo[2,3-*c*][1,2,6]selenadiazine-5-carbonitrile (**15**). 50% Probability ellipsoids.

### S2.1.4 X-Ray crystallographic studies of 4-chloro-6-morpholinopyrrolo[2,3-c][1,2,6]selenadiazine-5-carbonitrile (26)

**Table S7.** Crystal data and structure refinement for 4-chloro-6-morpholinopyrrolo[2,3-c][1,2,6]selenadiazine-5-carbonitrile (26).

|                                         |                                                                                                                                   |
|-----------------------------------------|-----------------------------------------------------------------------------------------------------------------------------------|
| Empirical formula                       | C <sub>10</sub> H <sub>8</sub> ClN <sub>5</sub> OSe                                                                               |
| Formula weight                          | 328.62                                                                                                                            |
| Temperature                             | 100(2) K                                                                                                                          |
| Radiation                               | Cu K $\alpha$ ( $\lambda = 1.54184$ Å)                                                                                            |
| Crystal system                          | monoclinic                                                                                                                        |
| Space group                             | P2 <sub>1</sub> n                                                                                                                 |
| Unit cell dimensions                    | $a = 9.9615(4)$ Å, $\alpha = 90^\circ$<br>$b = 5.9698(3)$ Å, $\beta = 92.102(4)^\circ$<br>$c = 18.9005(8)$ Å, $\gamma = 90^\circ$ |
| Volume                                  | 1123.22(9) Å <sup>3</sup>                                                                                                         |
| Z                                       | 4                                                                                                                                 |
| Density (calculated)                    | 1.943 g/cm <sup>3</sup>                                                                                                           |
| Absorption coefficient                  | 6.700 mm <sup>-1</sup>                                                                                                            |
| F(000)                                  | 648                                                                                                                               |
| Crystal size                            | 0.05 × 0.04 × 0.02 mm <sup>3</sup>                                                                                                |
| $\theta$ range for data collection      | 4.682 to 71.663°                                                                                                                  |
| Index ranges                            | -7 ≤ h ≤ 12, -7 ≤ k ≤ 7, -23 ≤ l ≤ 22                                                                                             |
| Reflections collected                   | 3867                                                                                                                              |
| Independent reflections                 | 2138 [R <sub>int</sub> = 0.0236]                                                                                                  |
| Completeness to $\theta = 67.684^\circ$ | 100%                                                                                                                              |
| Refinement method                       | Full-matrix least-squares on F <sup>2</sup>                                                                                       |
| Data / restraints / parameters          | 2138 / 45 / 163                                                                                                                   |
| Goodness-of-fit                         | 1.199                                                                                                                             |
| Final R indices [I > 2 $\sigma$ (I)]    | R <sub>obs</sub> = 0.0788, wR <sub>obs</sub> = 0.1883                                                                             |
| R indices [all data]                    | R <sub>all</sub> = 0.0830, wR <sub>all</sub> = 0.1909                                                                             |
| Extinction coefficient                  | .                                                                                                                                 |
| Largest diff. peak and hole             | 2.126 and -1.124 e <sup>-</sup> Å <sup>-3</sup>                                                                                   |

$$R = \frac{\sum ||F_o| - |F_c||}{\sum |F_o|}, wR = \left\{ \frac{\sum [w(|F_o|^2 - |F_c|^2)^2]}{\sum [w(|F_o|^4)]} \right\}^{1/2} \text{ and } w = 1 / [\sigma^2(F_o^2) + (0.0628P)^2 + 12.8831P]$$

where  $P = (F_o^2 + 2F_c^2) / 3$

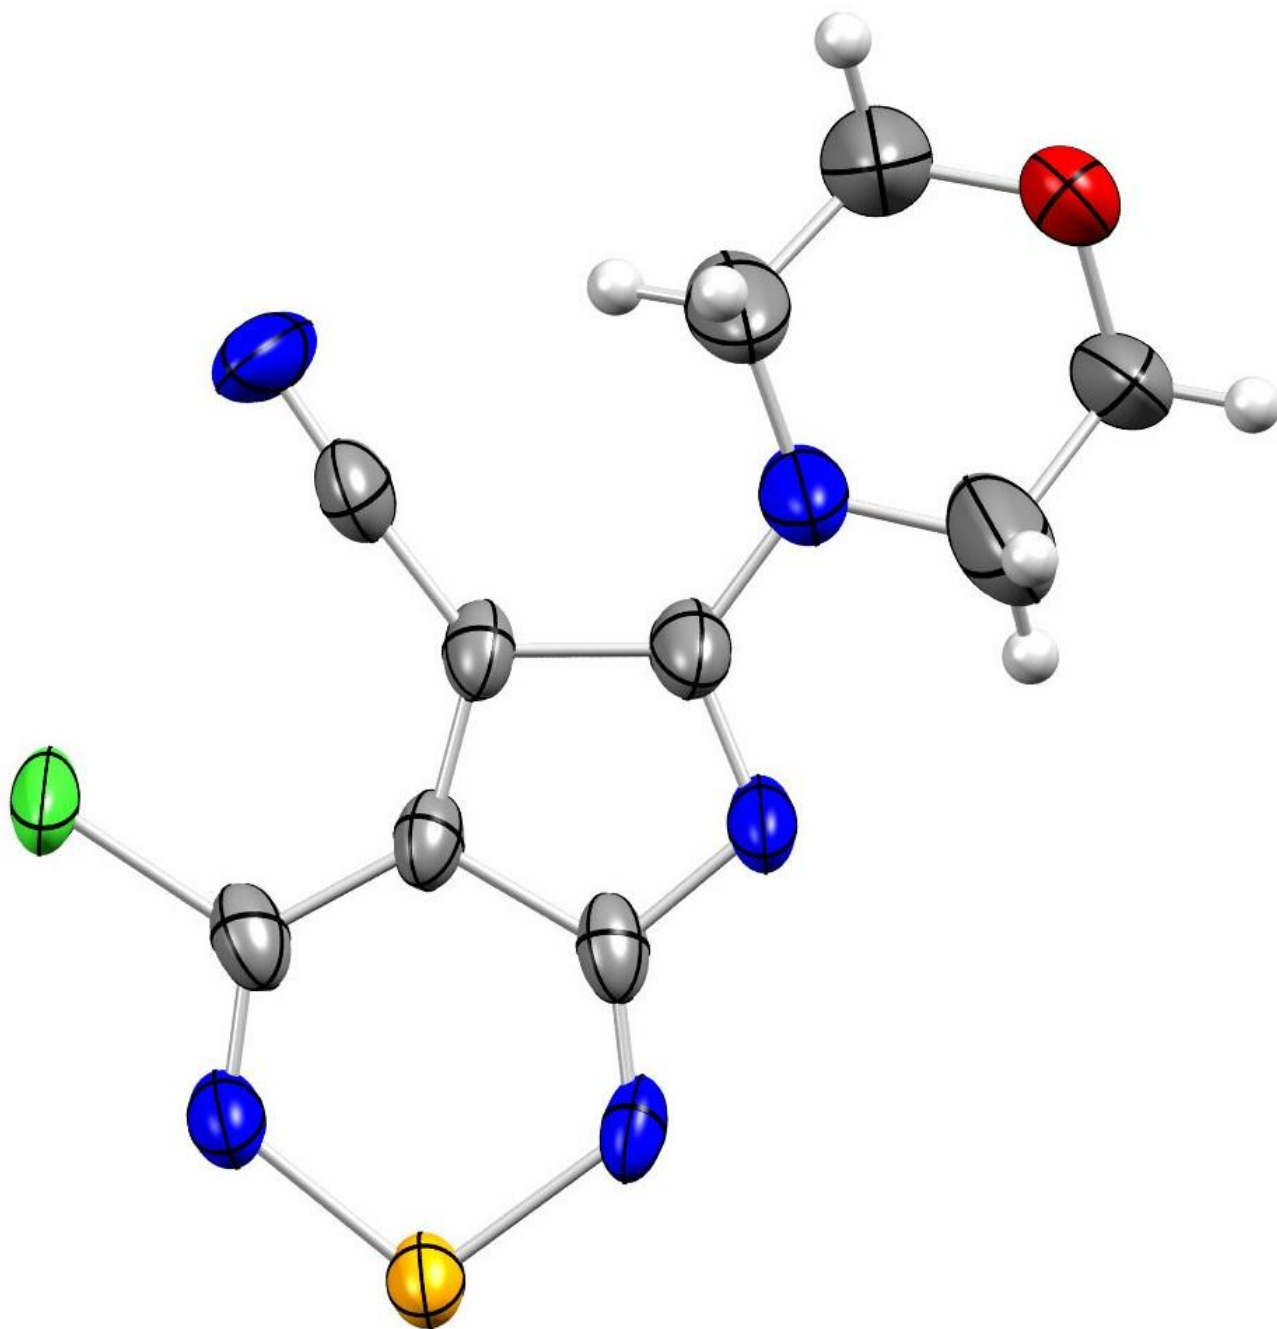

**Figure S7.** ORTEP view of 4-chloro-6-morpholinopyrrolo[2,3-*c*][1,2,6]selenadiazine-5-carbonitrile (**26**). 50% Probability ellipsoids.

### S2.1.5 X-Ray crystallographic studies of 4,6-dimorpholinopyrrolo[2,3-c][1,2,6]selenadiazine-5-carbonitrile (33)

**Table S8.** Crystal data and structure refinement for 4,6-dimorpholinopyrrolo[2,3-c][1,2,6]selenadiazine-5-carbonitrile (33).

|                                                                                                                                                                                                                                |                                                                                                                                                                                      |
|--------------------------------------------------------------------------------------------------------------------------------------------------------------------------------------------------------------------------------|--------------------------------------------------------------------------------------------------------------------------------------------------------------------------------------|
| Empirical formula                                                                                                                                                                                                              | C <sub>14</sub> H <sub>16</sub> N <sub>6</sub> O <sub>2</sub> Se                                                                                                                     |
| Formula weight                                                                                                                                                                                                                 | 379.29                                                                                                                                                                               |
| Temperature                                                                                                                                                                                                                    | 200(2) K                                                                                                                                                                             |
| Radiation                                                                                                                                                                                                                      | Cu K $\alpha$ ( $\lambda = 1.54184 \text{ \AA}$ )                                                                                                                                    |
| Crystal system                                                                                                                                                                                                                 | triclinic                                                                                                                                                                            |
| Space group                                                                                                                                                                                                                    | P-1                                                                                                                                                                                  |
| Unit cell dimensions                                                                                                                                                                                                           | $a = 5.21970(10) \text{ \AA}$ , $\alpha = 105.672(2)^\circ$<br>$b = 11.2505(2) \text{ \AA}$ , $\beta = 95.717(2)^\circ$<br>$c = 13.0616(2) \text{ \AA}$ , $\gamma = 94.437(2)^\circ$ |
| Volume                                                                                                                                                                                                                         | 730.48(2) $\text{\AA}^3$                                                                                                                                                             |
| Z                                                                                                                                                                                                                              | 2                                                                                                                                                                                    |
| Density (calculated)                                                                                                                                                                                                           | 1.724 g/cm <sup>3</sup>                                                                                                                                                              |
| Absorption coefficient                                                                                                                                                                                                         | 3.673 mm <sup>-1</sup>                                                                                                                                                               |
| F(000)                                                                                                                                                                                                                         | 384                                                                                                                                                                                  |
| Crystal size                                                                                                                                                                                                                   | 0.05 $\times$ 0.03 $\times$ 0.02 mm <sup>3</sup>                                                                                                                                     |
| $\theta$ range for data collection                                                                                                                                                                                             | 3.543 to 76.535 $^\circ$                                                                                                                                                             |
| Index ranges                                                                                                                                                                                                                   | -6 $\leq$ h $\leq$ 6, -13 $\leq$ k $\leq$ 10, -16 $\leq$ l $\leq$ 16                                                                                                                 |
| Reflections collected                                                                                                                                                                                                          | 8143                                                                                                                                                                                 |
| Independent reflections                                                                                                                                                                                                        | 2950 [ $R_{\text{int}} = 0.0356$ ]                                                                                                                                                   |
| Completeness to $\theta = 76.535^\circ$                                                                                                                                                                                        | 99.80%                                                                                                                                                                               |
| Refinement method                                                                                                                                                                                                              | Full-matrix least-squares on $F^2$                                                                                                                                                   |
| Data / restraints / parameters                                                                                                                                                                                                 | 2950 / 0 / 208                                                                                                                                                                       |
| Goodness-of-fit                                                                                                                                                                                                                | 1.060                                                                                                                                                                                |
| Final R indices [ $I > 2\sigma(I)$ ]                                                                                                                                                                                           | $R_{\text{obs}} = 0.0297$ , $wR_{\text{obs}} = 0.0780$                                                                                                                               |
| R indices [all data]                                                                                                                                                                                                           | $R_{\text{all}} = 0.0319$ , $wR_{\text{all}} = 0.0801$                                                                                                                               |
| Extinction coefficient                                                                                                                                                                                                         | .                                                                                                                                                                                    |
| Largest diff. peak and hole                                                                                                                                                                                                    | 0.471 and -0.387 e $\cdot\text{\AA}^{-3}$                                                                                                                                            |
| $R = \frac{\sum   F_o  -  F_c  }{\sum  F_o }$ , $wR = \left\{ \frac{\sum [w( F_o ^2 -  F_c ^2)^2]}{\sum [w( F_o ^4)]} \right\}^{1/2}$ and $w = 1/[\sigma^2(F_o^2) + (0.0628P)^2 + 12.8831P]$<br>where $P = (F_o^2 + 2F_c^2)/3$ |                                                                                                                                                                                      |

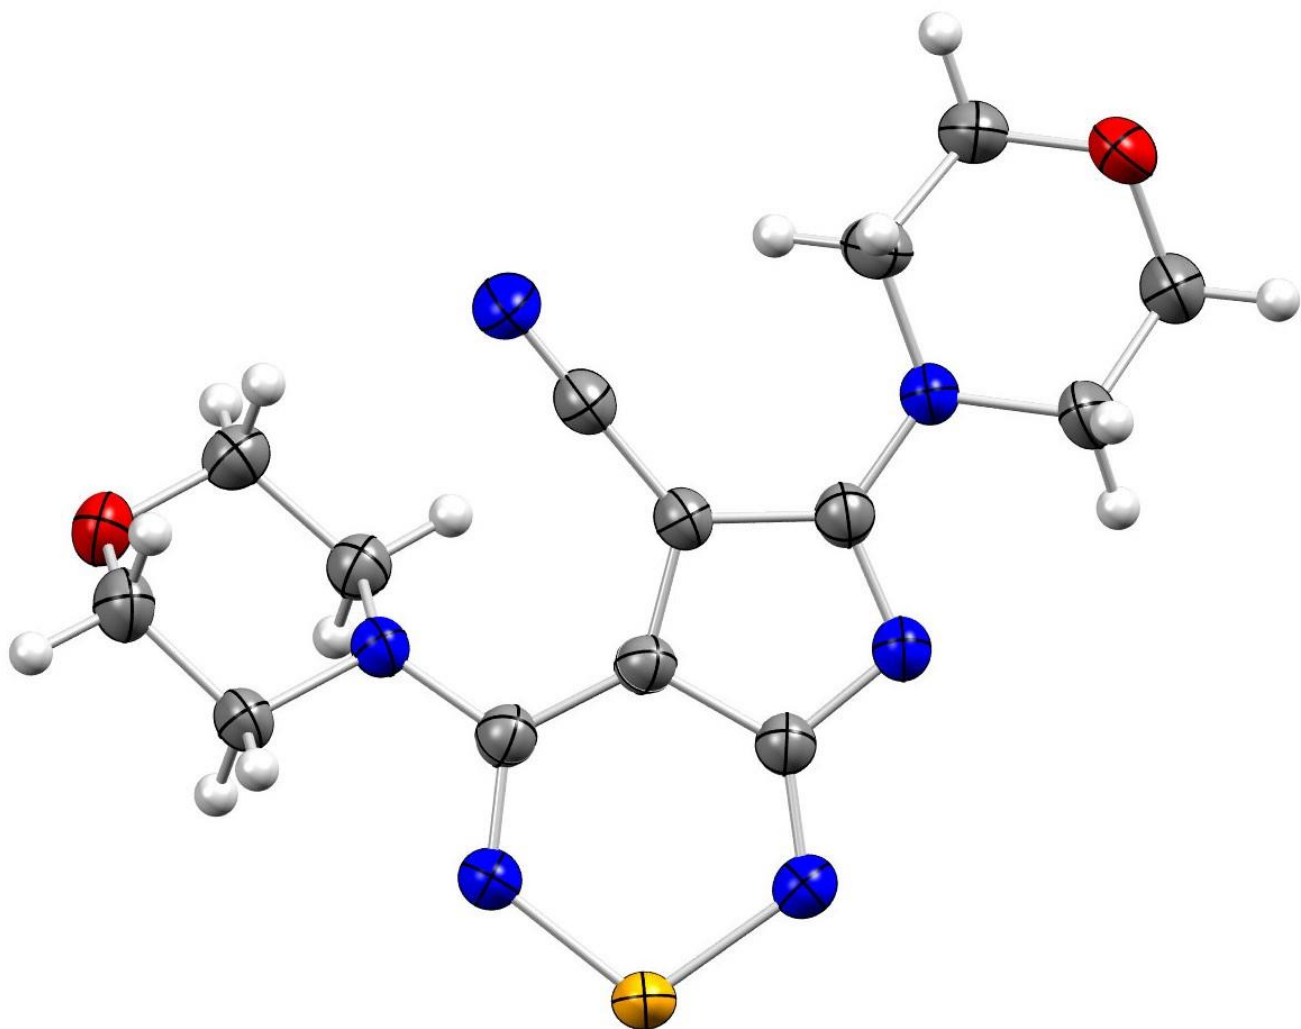

**Figure S8.** ORTEP view of 4,6-dimorpholinopyrrolo[2,3-*c*][1,2,6]selenadiazine-5-carbonitrile (**33**). 50% Probability ellipsoids.

### S2.1.6 X-Ray crystallographic studies of 2,5-dimorpholino-3-oxo-3H-pyrrole-4-carbonitrile (34)

**Table S9.** Crystal data and structure refinement for 2,5-dimorpholino-3-oxo-3H-pyrrole-4-carbonitrile (34).

|                                                       |                                                                              |
|-------------------------------------------------------|------------------------------------------------------------------------------|
| Empirical formula                                     | C <sub>13</sub> H <sub>16</sub> N <sub>4</sub> O <sub>3</sub>                |
| Formula weight                                        | 276.30                                                                       |
| Temperature                                           | 177.15 K                                                                     |
| Crystal system                                        | Monoclinic                                                                   |
| Space group                                           | C2/c                                                                         |
| <i>a</i> /Å                                           | 22.2254(4)                                                                   |
| <i>b</i> /Å                                           | 6.7299(2)                                                                    |
| <i>c</i> /Å                                           | 17.5435(4)                                                                   |
| $\alpha$ /°                                           | 90                                                                           |
| $\beta$ /°                                            | 90.539(2)                                                                    |
| $\gamma$ /°                                           | 90                                                                           |
| Volume/Å <sup>3</sup>                                 | 2623.95(11)                                                                  |
| Z                                                     | 8                                                                            |
| $\rho_{\text{calc}}/\text{cm}^3$                      | 1.399                                                                        |
| $\mu/\text{mm}^{-1}$                                  | 0.849                                                                        |
| F(000)                                                | 1168.0                                                                       |
| Crystal size/mm <sup>3</sup>                          | 0.08 × 0.03 × 0.025                                                          |
| Radiation                                             | Cu K $\alpha$ ( $\lambda$ = 1.54184 Å)                                       |
| 2 $\theta$ range for data collection/°                | 7.956 to 155.35                                                              |
| Index ranges                                          | -28 ≤ <i>h</i> ≤ 27, -5 ≤ <i>k</i> ≤ 8, -22 ≤ <i>l</i> ≤ 20                  |
| Reflections collected                                 | 8413                                                                         |
| Independent reflections                               | 2629 [ <i>R</i> <sub>int</sub> = 0.0344, <i>R</i> <sub>sigma</sub> = 0.0372] |
| Data/restraints/parameters                            | 2629/0/181                                                                   |
| Goodness-of-fit on F <sup>2</sup>                     | 1.044                                                                        |
| Final R indexes [ <i>I</i> ≥ 2 $\sigma$ ( <i>I</i> )] | <i>R</i> <sub>1</sub> = 0.0381, <i>wR</i> <sub>2</sub> = 0.0980              |
| Final R indexes [all data]                            | <i>R</i> <sub>1</sub> = 0.0436, <i>wR</i> <sub>2</sub> = 0.1027              |
| Largest diff. peak/hole / e Å <sup>-3</sup>           | 0.20/-0.23                                                                   |



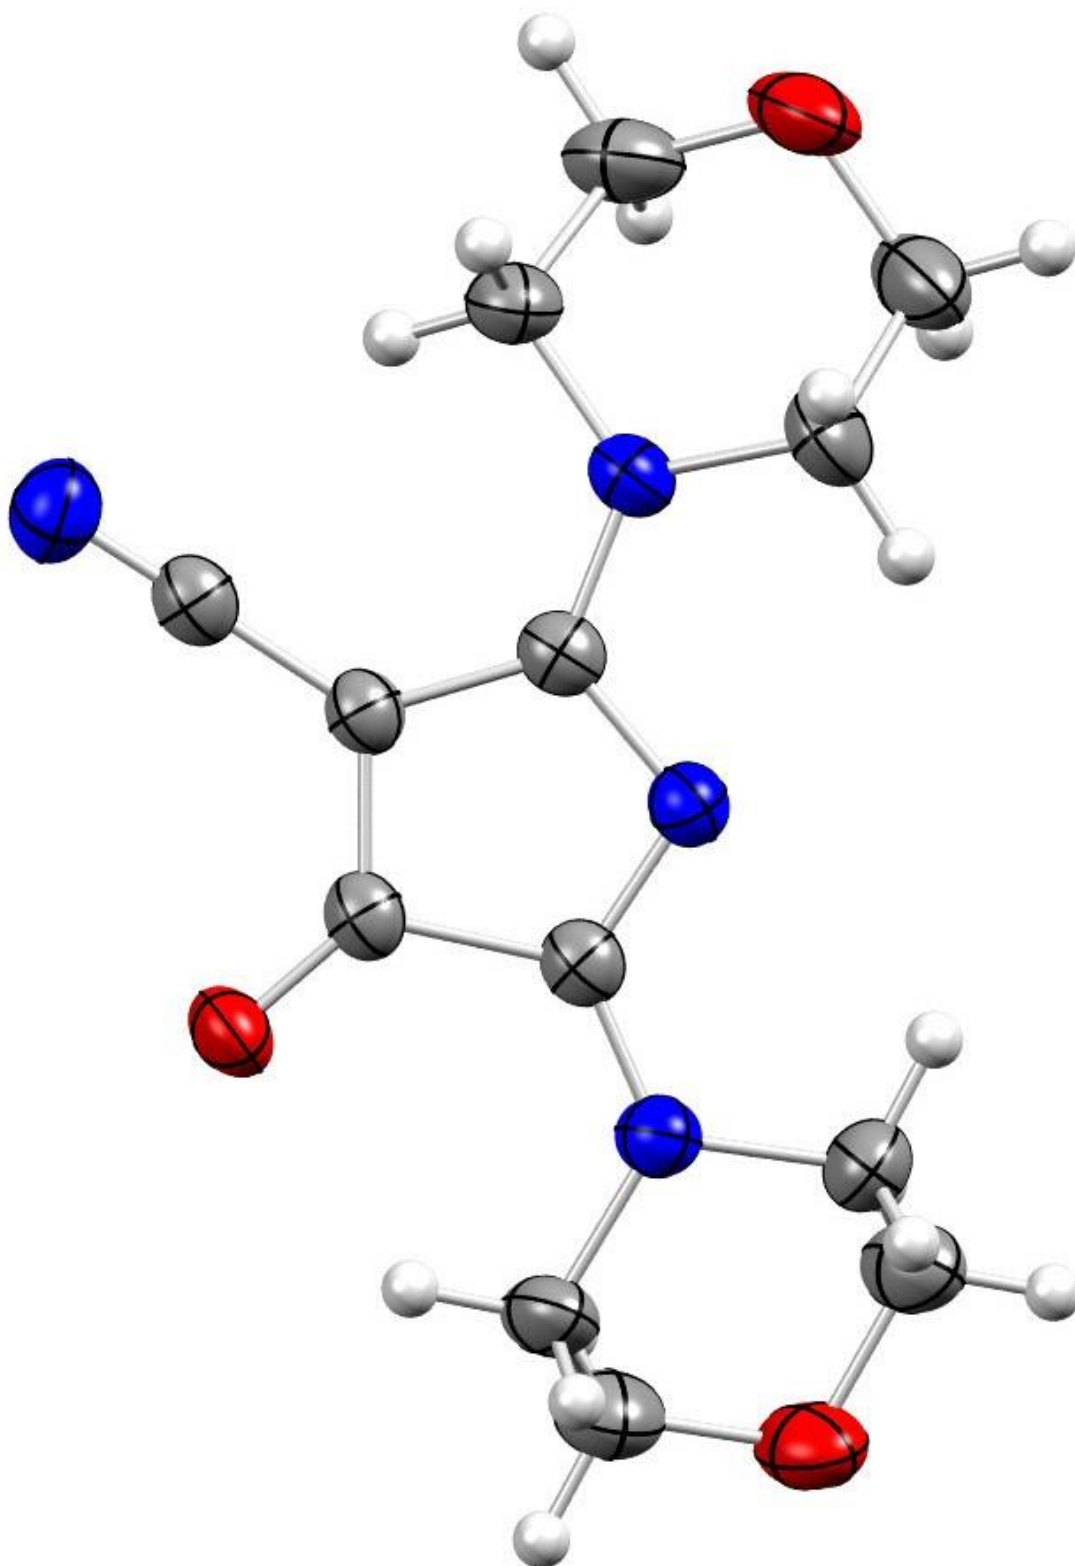

**Figure S9.** ORTEP view of 2,5-dimorpholino-3-oxo-3*H*-pyrrole-4-carbonitrile (**34**). 50% Probability ellipsoids.

### S2.1.7 X-Ray crystallographic studies of 3,5-dimorpholino-2-oxo-2H-pyrrole-4-carbonitrile (35)

**Table S10.** Crystal data and structure refinement for 3,5-dimorpholino-2-oxo-2H-pyrrole-4-carbonitrile (35).

|                                             |                                                                  |
|---------------------------------------------|------------------------------------------------------------------|
| Empirical formula                           | C <sub>13</sub> H <sub>16</sub> N <sub>4</sub> O <sub>3</sub> Se |
| Formula weight                              | 275.30                                                           |
| Temperature                                 | 114(2) K                                                         |
| Crystal system                              | orthorhombic                                                     |
| Space group                                 | Pna2 <sub>1</sub>                                                |
| a/Å                                         | 7.2528(4)                                                        |
| b/Å                                         | 9.1018(5)                                                        |
| c/Å                                         | 18.9222(10)                                                      |
| α/°                                         | 90                                                               |
| β/°                                         | 90                                                               |
| γ/°                                         | 90                                                               |
| Volume/Å <sup>3</sup>                       | 1249.12(12)                                                      |
| Z                                           | 4                                                                |
| ρ <sub>calc</sub> /cm <sup>3</sup>          | 1.469                                                            |
| μ/mm <sup>-1</sup>                          | 0.891                                                            |
| F(000)                                      | 584.0                                                            |
| Crystal size/mm <sup>3</sup>                | 0.025 × 0.024 × 0.022                                            |
| Radiation                                   | CuKα (λ = 1.54184 Å)                                             |
| 2θ range for data collection/°              | 9.348 to 152.87                                                  |
| Index ranges                                | -5 ≤ h ≤ 8, -11 ≤ k ≤ 9, -23 ≤ l ≤ 22                            |
| Reflections collected                       | 4143                                                             |
| Independent reflections                     | 2007 [R <sub>int</sub> = 0.0637, R <sub>sigma</sub> = 0.0845]    |
| Data/restraints/parameters                  | 2007/4/182                                                       |
| Goodness-of-fit on F <sup>2</sup>           | 1.044                                                            |
| Final R indexes [I ≥ 2σ (I)]                | R <sub>1</sub> = 0.1325, wR <sub>2</sub> = 0.3368                |
| Final R indexes [all data]                  | R <sub>1</sub> = 0.1407, wR <sub>2</sub> = 0.3477                |
| Largest diff. peak/hole / e Å <sup>-3</sup> | 0.93/-0.41                                                       |
| Flack parameter                             | 1.3(13)                                                          |

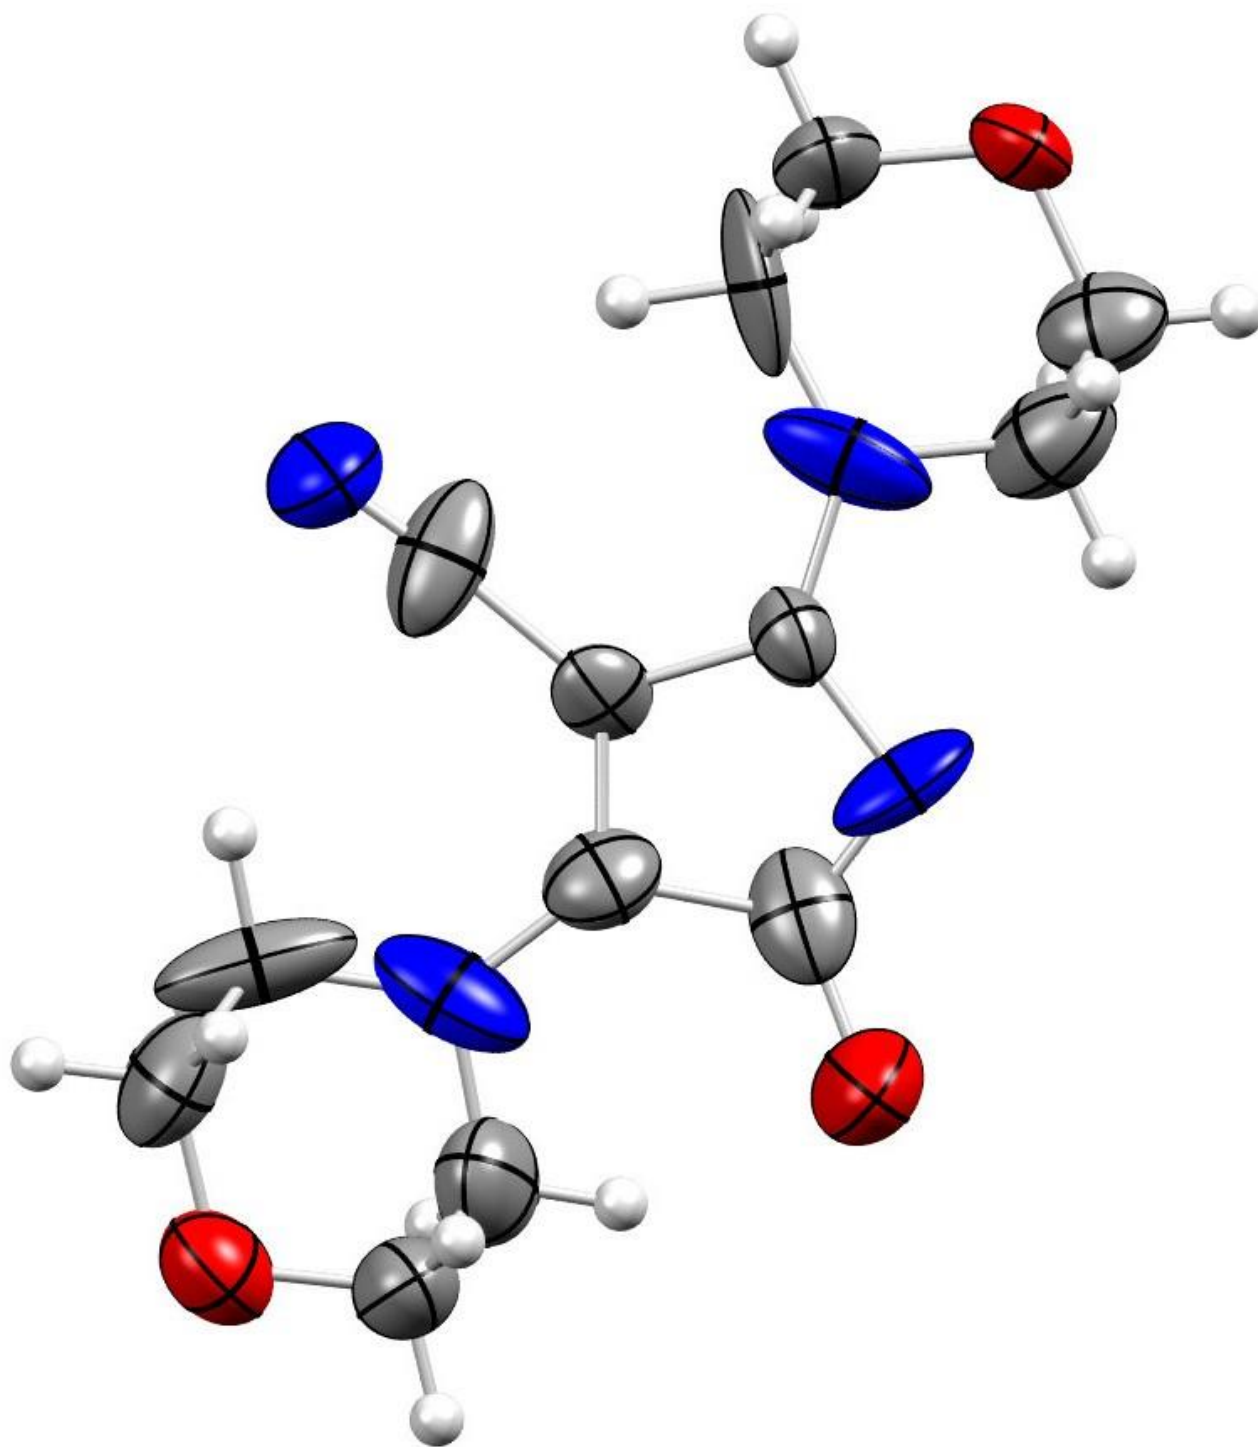

**Figure S10.** ORTEP view of 3,5-dimorpholino-2-oxo-2*H*-pyrrole-4-carbonitrile (**35**). 50% Probability ellipsoids.

## S2.2 Section references

1. *CrysAlis CCD* and *CrysAlis RED*, version 1.171.32.15; Oxford Diffraction Ltd, Abingdon, Oxford, England, 2008.
2. Sheldrick, G. M. *SHELXL-97: A program for the refinement of crystal structure*; University of Göttingen: Göttingen, Germany, 1997.
3. Farrugia, L. J. *WinGX suite for small-molecule single-crystal crystallography*. *J. Appl. Crystallogr.* **1999**, *32*, 837-838.
4. Brandenburg, K. *DIAMOND*, version 3.1d; Crystal Impact GbR, Bonn, Germany, 2006.
5. Dolomanov, O. V.; Bourhis, L. J.; Gildea, R. J.; Howard, J. A. K.; Puschmann, H. *OLEX2: a complete structure solution, refinement and analysis program*. *J. Appl. Cryst.* **2009**, *42*, 339-341.
6. Bourhis, L. J.; Dolomanov, O. V.; Gildea, R. J.; Howard, J. A. K.; Puschmann, H. *The anatomy of a comprehensive constrained, restrained refinement program for the modern computing environment - Olex2 dissected*. *Acta Cryst.* **2015**, *A71*, 59-75.
7. Sheldrick, G. M. *SHELXT - Integrated space-group and crystal-structure determination*. *Acta Cryst.* **2015**, *C71*, 3-8.

## S3 Experimental Section

### S3.1 General methods and materials

All chemicals were commercially available except those whose synthesis is described. Reactions were protected from atmospheric moisture via CaCl<sub>2</sub> drying tubes, and monitored by TLC using commercial glass backed thin layer chromatography (TLC) plates (Merck Kieselgel 60 F<sub>254</sub>). TLC plates were observed under UV light at 254 and 365 nm. The technique of dry flash chromatography was used throughout for all non-TLC scale chromatographic separations using Merck Silica Gel 60 (less than 0.063 mm).<sup>1</sup> Melting points were determined using a PolyTherm-A, Wagner & Munz, Kofler - Hotstage Microscope apparatus or were determined using a TA Instruments DSC Q1000 with samples hermetically sealed in aluminium pans under an argon atmosphere; using heating rates of 5 °C/min (DSC mp listed by onset and peak values). Solvents used for recrystallization are indicated after the melting points. UV-vis spectra were obtained using a Shimadzu UV-1900 spectrophotometer and inflections are identified by the abbreviation “inf”. IR spectra were recorded on a Shimadzu FTIR-NIR Prestige-21 spectrometer fitted with a Pike Miracle Ge ATR accessory and strong, medium and weak peaks are represented by s, m and w, respectively. <sup>1</sup>H and <sup>13</sup>C NMR spectra were recorded, as indicated, on a Bruker Avance 300 machine at 300 and 75 MHz, respectively, or on a Bruker Avance 500 machine at 500 and 125 MHz, respectively. Deuterated solvents were used for homonuclear lock and the signals are referenced to the deuterated solvent peaks. Attached proton test (APT) NMR studies were used for the assignment of the <sup>13</sup>C peaks C (quaternary), CH<sub>2</sub>, CH<sub>3</sub> and CH<sub>4</sub> as C (s), C (d), C (t) and C (q), respectively. Mass spectrometry was recorded with the Matrix-Assisted Laser Desorption/Ionization-Time of Flight (MALDI-TOF) mass spectrum (+ve mode) on a Bruker Autoflex III Smartbeam instrument or with the Agilent 1260 Infinity II Preparative LC/MSD System. Elemental analysis was performed using a Euro-Vector EA3000 CHN elemental analyzer. Tetracyanoethylene (TCNE)<sup>2</sup> and selenium dichloride (SeCl<sub>2</sub>)<sup>3</sup> were prepared according to the literature procedures.

### S3.2 Experimental procedures

#### S3.2.1 4,6-Dichloropyrrolo[2,3-*c*][1,2,6]selenadiazine-5-carbonitrile (**12**)

**Method A – from Se<sub>2</sub>Cl<sub>2</sub> and SO<sub>2</sub>Cl<sub>2</sub>:** To a stirred suspension of tetracyanoethylene (TCNE) (100 mg, 0.78 mmol) in DCE (2.5 mL) at *ca.* 20 °C was added first anhydrous benzyltriethylammonium chloride (3.5 mg, 2 mol%), then Se<sub>2</sub>Cl<sub>2</sub> (48.0 μL, 0.58 mmol) and finally SO<sub>2</sub>Cl<sub>2</sub> (32.0 μL, 0.40 mmol). The reaction mixture was then heated to *ca.* 70 °C for 40 h, allowed to cool to *ca.* 20 °C, adsorbed onto silica, chromatographed (DCM) and recrystallised to give the *title compound* **12** (92 mg, 42%) as yellow prisms,

mp (hot-stage) 210-215 °C (decomp.) (*c*-Hex/DCE), (DSC) mp onset: 204.7 °C, peak: 232.5 °C; 1<sup>st</sup> decomp. onset: 233.3 °C, peak: 238.3 °C; 2<sup>nd</sup> decomp. onset: 257.9 °C, peak: 267.8 °C (*c*-Hex/DCE, 80:20); *R*<sub>f</sub> 0.66 (Hex/TBME, 67:33); Anal. Calcd for C<sub>6</sub>Cl<sub>2</sub>N<sub>4</sub>Se: C, 25.93; N, 20.16. Found: C, 26.18; N, 20.08%;  $\lambda_{\text{max}}$ (DCM)/nm 256 (log  $\epsilon$  4.14), 295 (3.81), 373 inf (3.29), 445 (4.08), 477 inf (3.74);  $\nu_{\text{max}}$ /cm<sup>-1</sup>(ATR) 2230w (C≡N), 1730w, 1566s, 1547w, 1462w, 1356m, 1339m, 1287s, 1277s, 1165m, 1072m, 957m, 856s, 752s, 708s;  $\delta_{\text{C}}$ (125 MHz, CD<sub>2</sub>Cl<sub>2</sub>) 167.7 (s), 162.2 (s), 147.9 (s), 122.4 (s), 112.1 (s), 104.6 (s); *m/z* (MALDI-TOF) 301 (Se<sup>80</sup>Cl<sup>35</sup>: M<sup>+</sup>+Na, 18%), 279 (MH<sup>+</sup>, 24), 195 (13), 192 (36), 133 (40), 97 (10), 81 (11), 39 (100). Further elution (Hex/TBME, 33:67) gave 4-chloro-6-oxo-6,7-dihydro-pyrrolo[2,3-*c*][1,2,6]selenadiazine-5-carbonitrile (**13**) (61 mg, 30%) as orange prisms, mp (hot-stage) > 310 °C (decomp.) (DCE), (DSC) 1<sup>st</sup> decomp. onset: 199.9 °C, peak: 207.5 °C; 2<sup>nd</sup> decomp. onset: 216.2 °C, peak: 219.6 °C (DCE); *R*<sub>f</sub> 0.56 (Hex/TBME, 67:33); Anal. Calcd for C<sub>6</sub>HCIN<sub>4</sub>OSe: C, 27.77; H, 0.39; N, 21.59. Found: C, 27.41; H, 0.51; N, 21.87%;  $\lambda_{\text{max}}$ (DCM)/nm 275 (log  $\epsilon$  3.74), 281 inf (3.72), 429 (4.20), 437 inf (4.19);  $\nu_{\text{max}}$ /cm<sup>-1</sup>(ATR) 3113w (NH), 2772w, 2230w (C≡N), 1693s (C=O), 1587m, 1566s, 1464w, 1360m, 1337m, 1321m, 1175w, 1123m, 991w, 885m, 808w, 756m, 731m, 716s;  $\delta_{\text{H}}$ [300 MHz, (CD<sub>3</sub>)<sub>2</sub>C=O] 11.5 (1H, br s, D<sub>2</sub>O exchangeable);  $\delta_{\text{C}}$ [125 MHz, TFA-*d*] 166.9 (s), 149.4 (s), 143.1 (s), 122.8 (s), 109.8 (s), 96.7 (s); *m/z* (MALDI-TOF) 283 (Se<sup>80</sup>Cl<sup>35</sup>: M<sup>+</sup>+Na, 39%), 261 (MH<sup>+</sup>, 100), 225 (5), 149 (3), 133 (2), 91 (12), 39 (3).

**Method B – from in situ prepared SeCl<sub>2</sub>:** To a stirred suspension of elemental selenium (94.8 mg, 1.20 mmol) in anhydrous DCE (2.5 mL) at *ca.* 20 °C was added sulfuryl chloride (97.0  $\mu$ L, 1.20 mmol) and the mixture was stirred for 24 h at *ca.* 20 °C until no suspension remained. TCNE (100 mg, 0.78 mmol) was then added to the dark red mixture followed by anhydrous BnEt<sub>3</sub>NCl (3.5 mg, 2 mol%). The stirred mixture was then heated to *ca.* 70 °C for 40 h and then allowed to cool to *ca.* 20 °C, dissolved in DCM (200 mL), adsorbed onto silica, chromatographed (DCM) and recrystallised to give the title compound **12** (46 mg, 21%), as yellow prisms, mp (hot-stage) 210-215 °C (decomp.) (*c*-Hex/DCE); *R*<sub>f</sub> 0.66 (Hex/TBME, 67:33);  $\nu_{\text{max}}$ /cm<sup>-1</sup>(ATR) 2230w (C≡N), 1730w, 1566s, 1547w, 1462w, 1356m, 1339m, 1287s, 1277s, 1165m, 1072m, 957m, 856s, 752s, 708s; identical to that described above. Further elution (Hex/TBME, 33:67) gave 4-chloro-6-oxo-6,7-dihydro-pyrrolo[2,3-*c*][1,2,6]selenadiazine-5-carbonitrile (**15**) (32 mg, 16%), as orange prisms, mp (hot-stage) > 310 °C (decomp.) (DCE); *R*<sub>f</sub> 0.56 (Hex/TBME, 67:33);  $\nu_{\text{max}}$ /cm<sup>-1</sup>(ATR) 3113w (NH), 2772w, 2230w (C≡N), 1693s (C=O), 1587m, 1566s, 1464w, 1360m, 1337m, 1321m, 1175w, 1123m, 991w, 885m, 808w, 756m, 731m, 716s; identical to that described above.

**Method C – from in situ prepared SeCl<sub>2</sub> and chromatography free:** To a stirred suspension of selenium powder (593 mg, 7.50 mmol) in anhydrous DCE (15 mL) at *ca.* 20 °C was added sulfuryl chloride (606 μL, 7.50 mmol) and flame dried 4 Å molecular sieves. The mixture was stirred for 24 h at *ca.* 20 °C until no suspension remained. TCNE (640 mg, 5.00 mmol) was then added to the dark red mixture followed by anhydrous BnEt<sub>3</sub>NCl (22.5 mg, 2 mol%). The mixture was then heated at reflux for 40 h and then allowed to cool to *ca.* 20 °C. The mixture was dissolved in DCM (300 mL) and filtered to remove insoluble material. The filtrate was then washed (sat. NaHCO<sub>3</sub>, 4 × 50 mL). The combined aqueous phases were extracted with DCM (2 × 20 mL). The combined organic phases were dried (MgSO<sub>4</sub>), and passed through a Florisil plug, using DCM as eluent. The volatiles were removed *in vacuo* and the residue recrystallised to give the title compound **12** (977 mg, 70%), as yellow prisms, mp (hot-stage) 210-215 °C (decomp.) (*c*-Hex/DCE); *R*<sub>f</sub> 0.66 (Hex/TBME, 67:33);  $\nu_{\max}/\text{cm}^{-1}$ (ATR) 2230w (C≡N), 1730w, 1566s, 1547w, 1462w, 1356m, 1339m, 1287s, 1277s, 1165m, 1072m, 957m, 856s, 752s, 708s; identical to that described above.

### S3.2.2 4-Chloro-6-oxo-6,7-dihydropyrrolo[2,3-*c*][1,2,6]selenadiazine-5-carbonitrile (**13**)

A solution of 4,6-dichloropyrrolo[2,3-*c*][1,2,6]selenadiazine-5-carbonitrile (**12**) (27.8 mg, 0.10 mmol) in 2 mL of 9.2 M H<sub>2</sub>SO<sub>4</sub> (H<sub>2</sub>O/H<sub>2</sub>SO<sub>4</sub>, 50:50 v/v) at *ca.* 20 °C was stirred for 2.5 h until no starting material remained (TLC). The mixture was diluted with distilled water (8 mL) and extracted with DCM (3 × 20 mL). The combined organic phases were dried (MgSO<sub>4</sub>), the volatiles removed *in vacuo*, and the residue recrystallised to give the *title compound* **13** (16.0 mg, 59%) as orange prisms, mp (hot-stage) > 310 °C (decomp.) (DCE), *R*<sub>f</sub> 0.56 (Hex/TBME, 67:33);  $\nu_{\max}/\text{cm}^{-1}$ (ATR) 3113w (NH), 2772w, 2230w (C≡N), 1693s (C=O), 1587m, 1566s, 1464w, 1360m, 1337m, 1321m, 1175w, 1123m, 991w, 885m, 808w, 756m, 731m, 716s; identical to that described above.

### S3.2.3 4-Chloro-6-methoxypyrrolo[2,3-*c*][1,2,6]selenadiazine-5-carbonitrile (**14**)

**Method A – chromatographic isolation:** A vigorously stirred suspension of 4,6-dichloropyrrolo[2,3-*c*][1,2,6]selenadiazine-5-carbonitrile (**12**) (27.8 mg, 0.10 mmol) in anhydrous methanol (3 mL) was heated to reflux for 10 min until no starting material remained (TLC: Hex/TBME, 50:50). On cooling to *ca.* 20 °C, the mixture was then adsorbed onto silica and chromatographed (Hex/TBME, 67:33) to give the *title compound* **14** (27.0 mg, 99%) as yellow plates, mp (hot-plate) 170-177 °C (DCE) (decomp.); *R*<sub>f</sub> 0.45 (Hex/TBME, 40:60); Anal. Calcd for C<sub>7</sub>H<sub>3</sub>ClN<sub>4</sub>OSe: C, 30.74; H, 1.11; N, 20.48. Found: C, 30.99; H, 1.49; N, 20.15%;  $\lambda_{\max}$ (DCM)/nm 243 (log  $\epsilon$  4.30), 255 (4.27), 278 (4.13), 407 inf (4.11), 416 inf (4.22), 428 (4.27), 441 inf (4.19), 451 inf (3.97);  $\nu_{\max}/\text{cm}^{-1}$ (ATR) 2220w (C≡N), 1701w, 1605m, 1595m,

1572w, 1562w, 1483m, 1449w, 1396m, 1368w, 1352m, 1325s, 1215w, 1180w, 1003w, 949m, 868m, 775w, 725m, 714m;  $\delta_{\text{H}}$ (500 MHz,  $\text{CDCl}_3$ ) 4.36 (3H, s);  $\delta_{\text{C}}$ (75 MHz, TFA-*d*) 172.5 (s), 151.3 (s), 148.4 (s), 122.3 (s), 108.2 (s), 91.4 (s), 62.6 (q);  $m/z$  (LCMS) 275 ( $\text{Se}^{80}\text{Cl}^{35}$ :  $\text{MH}^+$ , 82%), 249 (7), 237 (16), 235 (5), 227 (24), 219 (5), 193 (86), 159 (19), 139 (12), 79 (24), 74 (62), 65 (55), 61 (100), 60 (57).

**Method B – non-chromatographic work-up:** A vigorously stirred suspension of 4,6-dichloropyrrolo[2,3-*c*][1,2,6]selenadiazine-5-carbonitrile (**12**) (27.8 mg, 0.10 mmol) in anhydrous methanol (3 mL) was heated to reflux for 10 min until no starting material remained (TLC: Hex/TBME, 50:50). On cooling to *ca.* 20 °C, the mixture was diluted with distilled water (40 mL) and extracted with DCM (2 × 40 mL). The combined organic phases were dried ( $\text{MgSO}_4$ ), the volatiles removed *in vacuo*, and the residue recrystallised to give the title compound **14** (27.4 mg, 100%) as yellow plates, mp (hot-plate) 170-177 °C (DCE) (decomp.);  $R_f$  0.45 (Hex/TBME, 40:60);  $\nu_{\text{max}}/\text{cm}^{-1}$ (ATR) 2220w ( $\text{C}\equiv\text{N}$ ), 1701w, 1605m, 1595m, 1572w, 1562w, 1483m, 1449w, 1396m, 1368w, 1352m, 1325s, 1215w, 1180w, 1003w, 949m, 868m, 775w, 725m, 714m; identical to that described above.

### S3.2.4 4-Chloro-6-phenoxy pyrrolo[2,3-*c*][1,2,6]selenadiazine-5-carbonitrile (**15**)

To a stirred suspension of 4,6-dichloropyrrolo[2,3-*c*][1,2,6]selenadiazine-5-carbonitrile (**12**) (27.8 mg, 0.10 mmol) in anhydrous DCM (4 mL) at *ca.* 20 °C was added phenol (47.1 mg, 0.50 mmol) and powdered  $\text{NaHCO}_3$  (42.0 mg, 0.50 mmol). The reaction mixture was heated at reflux for 72 h until no starting material remained (TLC). On cooling to *ca.* 20 °C, the mixture was diluted with DCM (15 mL) and washed (5%  $\text{NaHCO}_3$ , 2 × 30 mL). The organic phase was then adsorbed onto silica, and chromatographed (Hex/DCM, 20:80) to give the *title compound* **15** (23.0 mg, 65%) as yellow needles, mp (hot-plate) 178-185 °C (*c*-Hex/DCE) (decomp.);  $R_f$  0.57 (Hex/TBME, 40:60); Anal. Calcd for  $\text{C}_{12}\text{H}_5\text{ClN}_4\text{OSe}$ : C, 42.94; H, 1.50; N, 16.69. Found: C, 43.27; H, 1.13; N, 16.33%;  $\lambda_{\text{max}}$ (DCM)/nm 261 (log  $\epsilon$  4.37), 285 inf (4.21), 411 inf (4.03), 423 inf (4.15), 432 (4.19), 445 inf (4.11), 456 inf (3.93);  $\delta_{\text{H}}$ (300 MHz,  $\text{CDCl}_3$ ) 7.52-7.41 (4H, m), 7.37-7.32 (1H, m);  $\delta_{\text{C}}$ (125 MHz,  $\text{CDCl}_3$ ) one C (s) resonance missing, 175.3 (s), 161.3 (s), 152.9 (s), 145.3 (s), 130.1 (d), 127.1 (d), 123.3 (s), 120.7 (d), 111.8 (s);  $m/z$  (MALDI-TOF) 336 ( $\text{Se}^{80}\text{Cl}^{35}$ :  $\text{MH}^+$ , 100%), 244 (15).

### S3.2.5 6-Amino-4-chloropyrrolo[2,3-*c*][1,2,6]selenadiazine-5-carbonitrile (**16**)

A stirred solution of 4,6-dichloropyrrolo[2,3-*c*][1,2,6]selenadiazine-5-carbonitrile (**12**) (55.6 mg, 0.20 mmol) in anhydrous DCM (15 mL) at *ca.* 20 °C was sparged with  $\text{NH}_3$  (g) for 30 min, until no starting material remained (TLC). The reaction mixture was then cooled in an ice bath and filtered to collect the formed orange precipitate which was washed with distilled water, MeOH then pentane and recrystallized



to give the *title compound* **16** (30.9 mg, 60%) as yellow prisms, mp (hot-stage) 228-232 °C (decomp.) (THF);  $R_f$  0.39 (DCM/TBME); Anal. Calcd for  $C_6H_2ClN_5Se$ : C, 27.87; H, 0.78; N, 27.09. Found C, 27.56; H, 1.83; N, 27.37%;  $\lambda_{max}$ (DCM)/nm 251 (log  $\epsilon$  4.30), 267 inf (4.10), 297 (3.79), 453 (4.20);  $\nu_{max}/cm^{-1}$ (ATR) 3377w & 3323w (NH), 3090w br, 3013w, 2214w (C $\equiv$ N), 1657s, 1587m, 1566w, 1485m, 1464w, 1373m, 1341s, 1242w, 1136w, 883s, 775w, 754m, 700w;  $\delta_H$ (500 MHz, CD<sub>3</sub>OD) 4.57 (2H, s, D<sub>2</sub>O exchangeable);  $\delta_C$ (125 MHz, TFA-*d*) 160.1 (s), 149.6 (s), 145.9 (s), 122.1 (s), 108.7 (s), 91.8 (s);  $m/z$  (LCMS) 260 (Se<sup>80</sup>Cl<sup>35</sup>: MH<sup>+</sup>, 100%), 200 (17), 178 (33), 159 (20), 150 (18), 139 (43), 105 (15), 65 (45), 64 (46), 61 (21).

### S3.2.6 4-Chloro-6-(methylamino)pyrrolo[2,3-*c*][1,2,6]selenadiazine-5-carbonitrile (**17**)

**Method A – chromatographic isolation:** To a stirred suspension of 4,6-dichloropyrrolo[2,3-*c*][1,2,6]selenadiazine-5-carbonitrile (**12**) (27.8 mg, 0.10 mmol) in anhydrous DCM (4 mL) at *ca.* 20 °C was added a saturated methylamine solution in DCM (100  $\mu$ L). The mixture was stirred for 10 min until no starting material remained (TLC), adsorbed onto silica and chromatographed (DCM/TBME, 67:33) to give the *title compound* **17** (27.0 mg, 99%) as red prisms, mp (hot-stage) 183.2-189.1 °C (DCE) (decomp.);  $R_f$  0.46 (DCM/TBME; 50:50); Anal. Calcd for  $C_7H_4ClN_5Se$ : C, 30.85; H, 1.48; N, 25.69. Found: C, 30.47; H, 1.57; N, 25.33%;  $\lambda_{max}$ (EtOH)/nm 254 (log  $\epsilon$  4.38), 305 (3.92), 455 (4.27);  $\nu_{max}/cm^{-1}$ (ATR) 3273w (NH), 2222w (C $\equiv$ N), 1612s, 1584w, 1531m, 1468w, 1408m, 1341m, 1306m, 1231m, 1144w, 1053w, 1042w, 970w, 872m, 779w, 721m, 700m;  $\delta_H$ (500 MHz, DMSO-*d*<sub>6</sub>) 8.81 (1H, br s, D<sub>2</sub>O exchangeable), 3.04 (3H, d, *J* 5.0);  $\delta_C$ (125 MHz, TFA-*d*) 158.7 (s), 149.6 (s), 145.2 (s), 121.9 (s), 108.8 (s), 92.5 (s), 31.0 (q);  $m/z$  (LCMS) 274 (Se<sup>80</sup>Cl<sup>35</sup>: MH<sup>+</sup>, 100%), 249 (3), 214 (8), 197 (5), 192 (7), 160 (8), 74 (14), 64 (10).

**Method B – non-chromatographic work-up:** To a stirred suspension of 4,6-dichloropyrrolo[2,3-*c*][1,2,6]selenadiazine-5-carbonitrile (**12**) (13.9 mg, 0.05 mmol) in anhydrous DCM (2 mL) at *ca.* 20 °C was added a saturated methylamine solution in DCM (50  $\mu$ L). The mixture was stirred for 10 min until no starting material remained (TLC). The reaction mixture was diluted with DCM (20 mL) and washed with distilled water (2  $\times$  30 mL). The aqueous layer was then extracted with DCM (3  $\times$  20 mL). The combined organic phases were dried (MgSO<sub>4</sub>), the volatiles removed *in vacuo*, the residue recrystallized to give the *title compound* **17** (13.5 mg, 99%) as red prisms, mp (hot-stage) 183.2-189.1 °C (DCE) (decomp.);  $R_f$  0.46 (DCM/TBME, 50:50);  $\nu_{max}/cm^{-1}$ (ATR) 3273w (NH), 2222w (C $\equiv$ N), 1612s, 1584w, 1531m, 1468w, 1408m, 1341m, 1306m, 1231m, 1144w, 1053w, 1042w, 970w, 872m, 779w, 721m, 700m; identical to that described above.

### S3.2.7 6-(Benzylamino)-4-chloropyrrolo[2,3-*c*][1,2,6]selenadiazine-5-carbonitrile (**18**)

**Method A – chromatographic isolation:** To a stirred suspension of 4,6-dichloropyrrolo[2,3-*c*][1,2,6]-selenadiazine-5-carbonitrile (**12**) (27.8 mg, 0.10 mmol) in anhydrous DCM (2 mL) at *ca.* 20 °C was added benzylamine (24.0  $\mu$ L, 0.22 mmol). The stirred mixture was heated at reflux for 10 min, until no starting material remained (TLC), adsorbed onto silica and chromatographed (Hex/DCM/TBME, 33:33:34) to give the *title compound* **18** (34.3 mg, 98%) as orange plates, mp (hot-stage) 161-168 °C (decomp.) (*c*-Hex/DCE);  $R_f$  0.59 (Hex/DCM/TBME, 33:33:34); Anal. Calcd for C<sub>13</sub>H<sub>8</sub>ClN<sub>5</sub>Se: C, 44.78; H, 2.31; N, 20.09. Found C, 44.56; H, 2.62; N, 19.82%;  $\lambda_{\max}$ (DCM)/nm 256 (log  $\epsilon$  4.55), 262 inf (4.54), 288 inf (4.47), 302 (4.09), 449 (4.38), 466 (4.38);  $\nu_{\max}/\text{cm}^{-1}$ (ATR) 3298m (NH), 2222m (C $\equiv$ N), 1607s, 1584m, 1533m, 1456w, 1443w, 1433w, 1337m, 1308m, 1296m, 1248w, 1231w, 1221w, 1080w, 1051w, 1038w, 939w, 914w, 874w, 822w, 772w, 754m, 721m, 698s;  $\delta_{\text{H}}$ (300 MHz, CDCl<sub>3</sub>) 7.42-7.36 (5H, m), 6.09 (1H, br s, D<sub>2</sub>O exchangeable), 4.91 (2H, d,  $J$  5.1);  $\delta_{\text{C}}$ (125 MHz, Pyridine-*d*<sub>5</sub>) 167.3 (s), 164.2 (s), 140.9 (s), 138.5 (s), 128.8 (d), 128.0 (d), 127.6 (d), 125.0 (s), 113.9 (s), 97.2 (s), 47.1 (t);  $m/z$  (MALDI-TOF) 350 (Se<sup>80</sup>Cl<sup>35</sup>: MH<sup>+</sup>, 99%), 234 (22), 181 (12), 167 (13), 106 (64), 91 (97).

**Method B – non-chromatographic work-up:** To a stirred suspension of 4,6-dichloropyrrolo[2,3-*c*][1,2,6]selenadiazine-5-carbonitrile (**12**) (13.9 mg, 0.05 mmol) in anhydrous DCM (1 mL) at *ca.* 20 °C was added benzylamine (12.0  $\mu$ L, 0.11 mmol). The stirred mixture was heated to reflux for 10 min, until no starting material remained (TLC). The mixture was diluted in DCM (20 mL) and distilled water (60 mL) was added. Layers were separated and the aqueous phase was extracted with DCM (2  $\times$  20 mL). The combined organic phases were dried (MgSO<sub>4</sub>), the volatiles removed *in vacuo*, and the residue recrystallised to give the *title compound* **18** (17.2 mg, 99%) as orange plates, mp (hot-stage) 161-168 °C (decomp.) (*c*-Hex/DCE);  $R_f$  0.59 (Hex/DCM/TBME, 33:33:34);  $\nu_{\max}/\text{cm}^{-1}$ (ATR) 3298m NH), 2222m (C $\equiv$ N), 1607s, 1584m, 1533m, 1456w, 1443w, 1433w, 1337m, 1308m, 1296m, 1248w, 1231w, 1221w, 1080w, 1051w, 1038w, 939w, 914w, 874w, 822w, 772w, 754m, 721m, 698s; identical to that described above.

### S3.2.8 4-Chloro-6-(phenylamino)pyrrolo[2,3-*c*][1,2,6]selenadiazine-5-carbonitrile (**19**)

**Method A – chromatographic isolation:** To a stirred suspension of 4,6-dichloropyrrolo[2,3-*c*][1,2,6]-selenadiazine-5-carbonitrile (**12**) (13.9 mg, 0.05 mmol) in anhydrous DCM (1 mL) at *ca.* 20 °C was added aniline (10.0  $\mu$ L, 0.11 mmol). The mixture was stirred for 45 min, until no starting material remained (TLC), adsorbed onto silica and chromatographed (Hex/DCM/TBME, 10:45:45) to give the *title compound* **19** (16.6 mg, 99%) as red needles, mp (hot stage) 195.8-199.8 °C (decomp.) (DCE);  $R_f$

0.41 (Hex/DCM/TBME, 33:33:33); Anal. Calcd for C<sub>12</sub>H<sub>6</sub>ClN<sub>5</sub>Se: C, 43.07; H, 1.81; N, 20.93. Found: C, 43.23; H, 2.11; N, 21.16%;  $\lambda_{\max}$ (DCM)/nm 248 inf (log  $\epsilon$  4.26), 266 inf (4.40), 271 (4.42), 281 inf (4.30), 318 (4.28), 407 inf (3.80), 477 (4.34);  $\nu_{\max}/\text{cm}^{-1}$ (ATR) 3281w, 3210w & 3140w (NH), 3098w & 3057w (aryl C-H), 2239w (C $\equiv$ N), 1626s, 1605m, 1591s, 1574s, 1555m, 1495m, 1462s, 1445m, 1331m, 1321m, 1302w, 1277m, 1252w, 1240w, 1215w, 1182w, 1159w, 1123w, 1032w, 905w, 889s, 853w, 839w, 764s, 741m, 710s;  $\delta_{\text{H}}$ [500 MHz, (CD<sub>3</sub>)<sub>2</sub>C=O] 9.65 (1H, s, D<sub>2</sub>O exchangeable), 8.15 (2H, d, *J* 8.0), 7.45 (2H, t, *J* 8.0), 7.23 (1H, t, *J* 7.5);  $\delta_{\text{C}}$ [125 MHz, (CD<sub>3</sub>)<sub>2</sub>C=O] six C (s) resonances missing owing to poor solubility 130.0 (d), 125.9 (d), 122.0 (d), 113.7 (s); *m/z* (MALDI-TOF) 336 (Se<sup>80</sup>Cl<sup>35</sup>: MH<sup>+</sup>, 100%), 246 (1).

**Method B – non-chromatographic work-up:** To a stirred suspension of 4,6-dichloropyrrolo[2,3-*c*]-[1,2,6]selenadiazine-5-carbonitrile (**12**) (27.8 mg, 0.10 mmol) in anhydrous DCM (2 mL) at *ca.* 20 °C was added aniline (20.0  $\mu$ L, 0.22 mmol). The mixture was stirred for 1 h, until no starting material remained (TLC). The reaction mixture was diluted with DCM (60 mL) and distilled water (40 mL) was added. The layers were separated, and the aqueous phase was extracted with DCM (20 mL). The combined organic phases were dried (MgSO<sub>4</sub>), the volatiles removed *in vacuo*, and the residue recrystallised to give the title compound **19** (33.4 mg, 100%) as red needles, mp (hot stage) 195.8-199.8 °C (decomp.) (DCE); *R<sub>f</sub>* 0.41 (Hex/DCM/TBME, 33:33:33);  $\nu_{\max}/\text{cm}^{-1}$ (ATR) 3281w, 3210w & 3140w (NH), 3098w & 3057w (aryl C-H), 2239w (C $\equiv$ N), 1626s, 1605m, 1591s, 1574s, 1555m, 1495m, 1462s, 1445m, 1331m, 1321m, 1302w, 1277m, 1252w, 1240w, 1215w, 1182w, 1159w, 1123w, 1032w, 905w, 889s, 853w, 839w, 764s, 741m, 710s; identical to that described above.

### S3.2.9 4-Chloro-6-(dimethylamino)pyrrolo[2,3-*c*][1,2,6]selenadiazine-5-carbonitrile (**20**)

**Method A – chromatographic isolation:** To a stirred suspension of 4,6-dichloropyrrolo[2,3-*c*][1,2,6]selenadiazine-5-carbonitrile (**12**) (27.8 mg, 0.10 mmol) in anhydrous DCM (2 mL) at *ca.* 20 °C was added a saturated dimethylamine solution in DCM (200  $\mu$ L). The mixture was stirred for 10 min until no starting material remained (TLC), adsorbed onto silica and chromatographed (Hex/DCM/TBME, 20:60:20) to give the *title compound* **20** (28.4 mg, 99%) as red prisms, mp (hot-plate) 163-170 °C (decomp.) (DCE); *R<sub>f</sub>* 0.50 (Hex/DCM/TBME, 20:60:20); Anal. Calcd for C<sub>8</sub>H<sub>6</sub>ClN<sub>5</sub>Se: C, 33.53; H, 2.11; N, 24.44. Found: C, 33.26; H, 2.38; N, 24.07%;  $\lambda_{\max}$ (DCM) 264 nm (log  $\epsilon$  4.40), 269 (4.40), 276 inf (4.30), 310 (4.09), 320 inf (4.03), 407 inf (3.66), 432 inf (3.82), 480 (4.23), 500 inf (4.15);  $\nu_{\max}/\text{cm}^{-1}$ (ATR) 2933w (alkyl C-H), 2212w (C $\equiv$ N), 1609s, 1557m, 1497s, 1456w, 1423m, 1400m, 1329s, 1285m, 1221w, 1200w, 1111w, 1057w, 988w, 926s, 849m, 818w, 772s, 716s, 704s;  $\delta_{\text{H}}$ (300 MHz,

CDCl<sub>3</sub>) 3.64 (3H, br s), 3.45 (3H, br s);  $\delta_c$ (75 MHz, TFA-*d*) 156.3 (s), 149.4 (s), 145.5 (s), 123.8 (s), 111.2 (s), 91.4 (s), 42.6 (q), 40.8 (q);  $m/z$  (LCMS) 288 (Se<sup>80</sup>Cl<sup>35</sup>: MH<sup>+</sup>, 100%), 206 (13), 193 (6), 64 (8).

**Method B – non-chromatographic work-up:** To a stirred suspension of 4,6-dichloropyrrolo[2,3-*c*]-[1,2,6]selenadiazine-5-carbonitrile (**12**) (13.9 mg, 0.05 mmol) in anhydrous diethyl ether (2 mL) at *ca.* 20 °C was added a saturated dimethylamine solution in diethyl ether (200  $\mu$ L). The mixture was stirred for 10 min until no starting material remained (TLC). The reaction mixture was diluted with DCM (30 mL) and washed with distilled water (2  $\times$  30 mL). The aqueous layer was then extracted with DCM (30 mL). The combined organic phases were dried (MgSO<sub>4</sub>), volatiles removed *in vacuo*, and recrystallized to give the title compound **20** (14.2 mg, 99%) as red prisms, mp (hot-plate) 163-170 °C (decomp.) (DCE);  $R_f$  0.50 (Hex/DCM/TBME, 20:60:20);  $\nu_{\max}/\text{cm}^{-1}$ (ATR) 2933w (alkyl C-H), 2212w (C $\equiv$ N), 1609s, 1557m, 1497s, 1456w, 1423m, 1400m, 1329s, 1285m, 1221w, 1200w, 1111w, 1057w, 988w, 926s, 849m, 818w, 772s, 716s, 704s; identical to that described above.

#### S2.2.10 4-(Aziridin-1-yl)-6-chloropyrrolo[2,3-*c*][1,2,6]selenadiazine-5-carbonitrile (**21**)

**Method A – chromatographic isolation:** To a stirred suspension of 4,6-dichloropyrrolo[2,3-*c*][1,2,6]selenadiazine-5-carbonitrile (**12**) (27.8 mg, 0.10 mmol) in anhydrous DCM (2 mL) was aziridine (11.4  $\mu$ L, 0.22 mmol). The mixture was stirred for 5 min, until no starting material remained (TLC), adsorbed onto silica and chromatographed (Hex/DCM/TBME, 20:40:40) to give the *title compound* **21** (20.6 mg, 72%), as orange needles, mp (hot-stage) 142-152 °C (decomp.) (DCE);  $R_f$  0.46 (Hex/DCM/TBME, 20:40:40) (DCE); Anal. Calcd for C<sub>8</sub>H<sub>4</sub>ClN<sub>5</sub>Se: C, 33.77; H, 1.42; N, 24.61. Found: C, 34.05; H, 1.21; N, 24.72%;  $\lambda_{\max}$ (DCM)/nm 260 inf (log  $\epsilon$  4.44), 262 (4.45), 267 inf (4.41), 301 (3.81), 417 inf (4.18), 430 inf (4.31), 440 (4.38), 449 inf (4.34), 463 inf (4.25);  $\nu_{\max}/\text{cm}^{-1}$ (ATR) 3148w (alkyl C-H), 2207w (C $\equiv$ N), 1585m, 1557w, 1452m, 1441m, 1342w, 1321s, 1296w, 1258w, 1150w, 1113w, 1065w, 988w, 907w, 881w, 835w, 810w, 762w, 729w, 712w;  $\delta_H$ (300 MHz, VT 80 °C, CDCl<sub>3</sub>) 2.76 (4H, br s);  $\delta_C$ (125 MHz, VT 80 °C, CDCl<sub>3</sub>) six C (s) resonances missing owing to poor solubility 28.9 (t);  $m/z$  (MALDI-TOF) 324 (Se<sup>80</sup>Cl<sup>35</sup>: M<sup>+</sup>+K, 11%), 308 (MH<sup>+</sup>, 54), 286 (MH<sup>+</sup>, 100), 258 (18), 228 (10), 180 (13), 170 (25), 133 (16), 97 (13), 81 (18).

**Method B – non-chromatographic work-up:** To a stirred suspension of 4,6-dichloropyrrolo[2,3-*c*]-[1,2,6]selenadiazine-5-carbonitrile (**12**) (27.8 mg, 0.10 mmol) in anhydrous DCM (4 mL) at *ca.* 0 °C was added aziridine (11.4  $\mu$ L, 0.22 mmol). The mixture was stirred for 10 min, until no starting material remained (TLC), diluted with DCM (50 mL), and washed with distilled water (2  $\times$  50 mL). The combined aqueous layers were extracted with DCM (3  $\times$  30 mL). The combined organic phases were dried

(MgSO<sub>4</sub>), the volatiles removed *in vacuo*, and the residue recrystallised to give the title compound **21** (28.4 mg, 99%), mp (hot-stage) 142-152 °C (decomp.) (DCE);  $\nu_{\max}/\text{cm}^{-1}$ (ATR) 3148w (alkyl C-H), 2207w (C≡N), 1585m, 1557w, 1452m, 1441m, 1342w, 1321s, 1296w, 1258w, 1150w, 1113w, 1065w, 988w, 907w, 881w, 835w, 810w, 762w, 729w, 712w; identical to that described above.

### S3.2.11 6-(Azetidin-1-yl)-4-chloropyrrolo[2,3-*c*][1,2,6]selenadiazine-5-carbonitrile (**22**)

**Method A – chromatographic isolation:** To a stirred suspension of 4,6-dichloropyrrolo[2,3-*c*][1,2,6]-selenadiazine-5-carbonitrile (**12**) (41.7 mg, 0.15 mmol) in anhydrous DCM (4 mL) at *ca.* 20 °C was added azetidine (22.2  $\mu\text{L}$ , 0.33 mmol). The mixture was stirred for 5 min, until no starting material remained (TLC), adsorbed onto silica and chromatographed (Hex/DCM/TBME, 10:20:60) to give the *title compound 22* (39.0 mg, 87%) as red prisms, mp (hot-stage) 161-166 °C (decomp.) (DCE);  $R_f$  0.36 (Hex/DCM/TBME, 17:33:50); Anal. Calcd for C<sub>9</sub>H<sub>6</sub>ClN<sub>5</sub>Se: C, 36.20; H, 2.03; N, 23.45. Found: C, 36.51; H, 1.88; N, 23.63%;  $\lambda_{\max}$ (DCM)/nm 263 (log  $\epsilon$  4.44), 269 (4.43), 278 inf (4.24), 302 inf (4.07), 310 (4.10), 320 inf (4.04), 399 inf (3.61), 465 inf (3.22), 477 (4.24), 497 inf (4.17);  $\nu_{\max}/\text{cm}^{-1}$ (ATR) 2960w & 2870w (alkyl C-H), 2207m (C≡N), 1626s, 1560m, 1493s, 1462m, 1450m, 1341m, 1325m, 1304m, 1260s, 1229m, 1198w, 1161w, 1123w, 1059w, 1034m, 932w, 918m, 872w, 820w, 768s, 708s;  $\delta_{\text{H}}$ (300 MHz, CDCl<sub>3</sub>) 4.79 (2H, t,  $J$  7.5), 4.50 (2H, t,  $J$  8.1), 2.64 (2H, app. Pentet,  $J$  7.9);  $\delta_{\text{H}}$ (500 MHz, TFA-*d*) 4.99 (2H, br s), 4.64 (2H, br s), 2.76 (2H, br s);  $\delta_{\text{C}}$ (125 MHz, TFA-*d*) one C (s) resonance missing 156.3 (s), 152.2 (s), 147.4 (s), 125.4 (s), 94.0 (s), 58.4 (t), 58.1 (t), 18.8 (t);  $m/z$  (MALDI-TOF) 300 (Se<sup>80</sup>Cl<sup>35</sup>: MH<sup>+</sup>, 65%), 272 (20), 217 (100), 189 (20), 133 (19), 56 (7), 39 (33).

**Method B – non-chromatographic work-up:** To a stirred suspension of 4,6-dichloropyrrolo[2,3-*c*][1,2,6]selenadiazine-5-carbonitrile (**12**) (83.4 mg, 0.30 mmol) in anhydrous DCM (6 mL) at *ca.* 20 °C was added azetidine (44.4  $\mu\text{L}$ , 0.66 mmol). The mixture was stirred for 5 min until no starting material remained (TLC). To the reaction mixture was then added distilled water (30 mL) followed by DCM (50 mL). Phases were separated and the aqueous phase was extracted with DCM (4  $\times$  50 mL). The combined organic phases were dried (MgSO<sub>4</sub>), the volatiles removed *in vacuo*, and the residue recrystallised to give the title compound **22** (86.6 mg, 97%) as red prisms, mp (hot-stage) 161-166 °C (decomp.) (DCE);  $R_f$  0.36 (Hex/DCM/TBME, 17:33:50);  $\nu_{\max}/\text{cm}^{-1}$ (ATR) 2960w & 2870w (alkyl C-H), 2207m (C≡N), 1626s, 1560m, 1493s, 1462m, 1450m, 1341m, 1325m, 1304m, 1260s, 1229m, 1198w, 1161w, 1123w, 1059w, 1034m, 932w, 918m, 872w, 820w, 768s, 708s; identical to that described above.

### S3.2.12 4-Chloro-6-(pyrrolidine-1-yl)pyrrolo[2,3-*c*][1,2,6]selenadiazine-5-carbonitrile (**23**)

**Method A:** To a stirred suspension of 4,6-dichloropyrrolo[2,3-*c*][1,2,6]selenadiazine-5-carbonitrile (**12**) (13.9 mg, 0.05 mmol) in anhydrous DCM (2 mL) at *ca.* 20 °C was added pyrrolidine (9.0  $\mu$ L, 0.11 mmol). The mixture was stirred for 1.5 h, until no starting material remained (TLC), adsorbed onto silica and chromatographed (Hex/DCM/TBME, 20:40:40) to give the *title compound* **23** (12.3 mg, 79%) as red needles, mp (hot-stage) 157-163 °C (decomp.) (*c*-Hex/DCE); *R<sub>f</sub>* 0.52 (Hex/DCM/TBME, 20:40:40); Anal. Calcd for C<sub>10</sub>H<sub>8</sub>ClN<sub>5</sub>Se: C, 38.42; H, 2.58; N, 22.40. Found: C, 38.80; H, 2.35; N, 22.01%;  $\lambda_{\text{max}}$ (DCM)/nm 259 inf (log  $\epsilon$  4.08), 262 (4.12), 268 (4.11), 309 (3.78), 322 inf (3.73), 394 inf (3.27), 477 (3.85), 501 inf (3.76);  $\nu_{\text{max}}$ /cm<sup>-1</sup>(ATR) 2961w & 2874w (alkyl C-H), 2216w (C $\equiv$ N), 1609s, 1560m, 1489s, 1454m, 1333s, 1304m, 1294m, 1261s, 1229w, 1184w, 1140w, 1034w, 1003w, 978w, 914s, 858w, 829w, 766s, 716s, 700s;  $\delta_{\text{H}}$ (300 MHz, CDCl<sub>3</sub>) 4.12 (2H, t, *J* 6.9), 3.90 (2H, t, *J* 6.8), 2.19 (2H, app. Pentet, *J* 6.7), 2.07 (2H, app. Pentet, *J* 6.6);  $\delta_{\text{C}}$ (125 MHz, CDCl<sub>3</sub>) 163.5 (s), 163.1 (s), 142.1 (s), 126.0 (s), 115.5 (s), 96.4 (s), 51.3 (t), 48.7 (t), 26.6 (t), 24.4 (t); *m/z* (MALDI-TOF) 336 (Se<sup>80</sup>Cl<sup>35</sup>: M<sup>+</sup>+Na, 6%), 312 (M<sup>+</sup>, 100), 277 (25), 200 (51), 133 (17), 110 (17), 70 (39).

### S3.2.13 4-Chloro-6-(piperidin-1-yl)pyrrolo[2,3-*c*][1,2,6]selenadiazine-5-carbonitrile (**24**)

**Method A – chromatographic isolation:** To a stirred suspension of 4,6-dichloropyrrolo[2,3-*c*][1,2,6]selenadiazine-5-carbonitrile (**12**) (14.2 mg, 0.05 mmol) in anhydrous DCM (2 mL) at *ca.* 20 °C was added dropwise piperidine (10.9  $\mu$ L, 0.11 mmol). The mixture was stirred for 5 min, until no starting material remained (TLC), adsorbed onto silica and chromatographed (Hex/DCM/TBME, 20:40:40) to give the *title compound* **24** (16.2 mg, 97%) as red needles, mp (hot-stage) 158-165 °C (decomp.); *R<sub>f</sub>* 0.46 (Hex/TBME, 33:67); Anal. Calcd for C<sub>11</sub>H<sub>10</sub>ClN<sub>5</sub>Se: C, 40.45; H, 3.09; N, 21.44. Found: C, 40.73; H, 2.87; N, 21.04%;  $\lambda_{\text{max}}$ (DCM)/nm 256 inf (log  $\epsilon$  4.26), 269 (4.37), 281 inf (4.23), 312 (4.12), 405 inf (3.62), 487 (4.20), 512 inf (4.08);  $\nu_{\text{max}}$ /cm<sup>-1</sup>(ATR) 2943w & 2862w (alkyl C-H), 2207m (C $\equiv$ N), 1582s, 1547m, 1493m, 1449m, 1339s, 1325m, 1292s, 1258w, 1217w, 1155w, 1119w, 1022w, 978w, 905s, 845m, 820w, 768s, 708m, 704m;  $\delta_{\text{H}}$ (300 MHz, CDCl<sub>3</sub>) 4.13 (4H, br s), 1.80 (6H, br s);  $\delta_{\text{C}}$ (125 MHz, CDCl<sub>3</sub>) 164.7 (s), 162.7 (s), 141.9 (s), 126.9 (s), 115.6 (s), 95.4 (s), 49.7 (t), 48.4 (t), 26.9 (t), 25.8 (t), 24.1 (t); *m/z* (MALDI-TOF) 350 (Se<sup>80</sup>Cl<sup>35</sup>: M<sup>+</sup>+Na, 19%), 326 (M<sup>+</sup>-H, 100), 291 (29), 272 (13), 212 (33), 192 (20), 133 (64), 84 (81).

**Method B – non-chromatographic work-up:** To a stirred suspension of 4,6-dichloropyrrolo[2,3-*c*][1,2,6]selenadiazine-5-carbonitrile (**12**) (28.0 mg, 0.10 mmol) in anhydrous DCM (2 mL) at *ca.* 20 °C was added dropwise piperidine (22.0  $\mu$ L, 0.22 mmol). The mixture was stirred for 5 min until no starting

material remained (TLC). To the reaction mixture was then added distilled water (30 mL) followed by DCM (30 mL). Phases were separated and the aqueous phase was extracted with DCM (30 mL). The combined organic phases were dried (MgSO<sub>4</sub>), volatiles removed *in vacuo*, and the residue recrystallized to give the title compound **24** (31.7 mg, 96%) as red needles, mp (hot-stage) 158-165 °C (decomp.); *R<sub>f</sub>* 0.46 (Hex/TBME, 33:67);  $\nu_{\max}/\text{cm}^{-1}$ (ATR) 2943w & 2862w (alkyl C-H), 2207m (C≡N), 1582s, 1547m, 1493m, 1460m, 1449m, 1339s, 1325m, 1292s, 1258w, 1217w, 1155w, 1119w, 1022w, 978w, 905s, 845m, 820w, 768s, 708m, 704m; identical to that described above.

### S3.2.14 4-Chloro-6-(4-methylpiperazin-1-yl)[2,3-*c*][1,2,6]selenadiazine-5-carbonitrile (**25**)

**Method A – chromatographic isolation:** To a stirred suspension of 4,6-dichloropyrrolo[2,3-*c*][1,2,6]-selenadiazine-5-carbonitrile (**12**) (13.9 mg, 0.50 mmol) in anhydrous DCM (1 mL) at *ca.* 20 °C was added 1-methylpiperazine (12.2 μL, 0.11 mmol). The mixture was stirred for 5 min until no starting material remained (TLC). The reaction mixture was concentrated and chromatography (basic alumina) (Hex/DCM, 10:90) gave the *title compound* **25** (15.9 mg, 93%) as red needles, mp (hot-stage) 158-162 °C (decomp.) (EtOH); *R<sub>f</sub>* 0.36 (Hex/DCM, 10:90, neutral alumina); Anal. Calcd for C<sub>11</sub>H<sub>11</sub>ClN<sub>6</sub>Se: C, 38.67; H, 3.25; N, 24.60. Found: C, 39.03; H, 3.44; N, 24.25%;  $\lambda_{\max}$ (DCM)/nm 264 (log  $\epsilon$  4.42), 268 (4.42), 281 inf (4.27), 311 (4.15), 320 inf (4.11), 407 inf (3.74), 481 (4.25), 505 inf (4.15);  $\nu_{\max}/\text{cm}^{-1}$ (ATR) 2922w & 2820w (alkyl C-H), 2214w (C≡N), 1587s, 1543m, 1495m, 1445m, 1427w, 1383w, 1341s, 1323m, 1306m, 1283s, 1144m, 1130w, 1072w, 1053w, 1003m, 984w, 907m, 833m, 770m, 706m;  $\delta_{\text{H}}$ (300 MHz, CDCl<sub>3</sub>) 4.33 (4H, br s), 2.64 (4H, br s), 2.39 (3H, s);  $\delta_{\text{C}}$ (75 MHz, CDCl<sub>3</sub>) 165.2 (s), 162.7 (s), 142.4 (s), 126.9 (s), 115.7 (s), 95.3 (s), 54.9 (br, t), 47.2 (br, t), 46.0 (q); *m/z* (MALDI-TOF) 341 (Se<sup>80</sup>Cl<sup>35</sup>: M<sup>+</sup>-H, 100%), 227 (13), 99 (51), 70 (49).

**Method B – non-chromatographic work-up:** To a stirred suspension of 4,6-dichloropyrrolo[2,3-*c*][1,2,6]selenadiazine-5-carbonitrile (**12**) (83.4 mg, 0.30 mmol) in anhydrous DCM (6 mL) at *ca.* 20 °C was added 1-methylpiperazine (73.1 μL, 0.66 mmol). The mixture was stirred for 5 min until no starting material remained (TLC). To the reaction mixture was then added distilled water (30 mL) followed by DCM (30 mL). Phases were separated and the aqueous phase was extracted with DCM (30 mL). The combined organic phases were dried (MgSO<sub>4</sub>), the volatiles removed *in vacuo*, and the residue recrystallized to give the title compound **25** (99.9 mg, 97%) as red needles, mp (hot-stage) 158-162 °C (decomp.) (EtOH); *R<sub>f</sub>* 0.36 (Hex/DCM, 10:90, neutral alumina);  $\nu_{\max}/\text{cm}^{-1}$ (ATR) 2922w & 2820w (alkyl C-H), 2214w (C≡N), 1587s, 1543m, 1495m, 1445m, 1427w, 1383w, 1341s, 1323m, 1306m, 1283s,

1144m, 1130w, 1072w, 1053w, 1003m, 984w, 907m, 833m, 770m, 706m; identical to that described above.

### S3.2.15 4-Chloro-6-morpholinopyrrolo[2,3-*c*][1,2,6]selenadiazine-5-carbonitrile (**26**)

**Method A – chromatographic isolation:** To a stirred suspension of 4,6-dichloropyrrolo[2,3-*c*][1,2,6]selenadiazine-5-carbonitrile (**12**) (13.9 mg, 0.05 mmol) in anhydrous DCM (1 mL) at *ca.* 20 °C was added morpholine (9.5  $\mu$ L, 0.11 mmol). The mixture was heated to reflux for 5 min, until no starting material remained (TLC), allowed to cool to *ca.* 20 °C, adsorbed onto silica and chromatographed (Hex/DCM/TBME, 10:70:20  $\rightarrow$  10:50:40) to give the *title compound* **26** (16.3 mg, 99%) as red prisms, mp (hot-stage) 152-158 °C (decomp.) (*c*-Hex/DCE), *R*<sub>f</sub> 0.68 (Hex/DCM/TBME, 20:60:20); Anal. Calcd for C<sub>10</sub>H<sub>8</sub>ClN<sub>5</sub>OSe: C, 36.55; H, 2.45; N, 21.31. Found: C, 36.37; H, 2.05; N, 21.66%;  $\lambda_{\text{max}}$ (DCM)/nm 271 (log  $\epsilon$  4.40), 277 inf (4.35), 310 (4.11), 318 inf (4.06), 412 inf (3.65), 432 inf (3.83), 480 (4.22), 496 inf (4.16);  $\nu_{\text{max}}$ /cm<sup>-1</sup>(ATR) 2934w br & 2872w (alkyl C-H), 2208w (C $\equiv$ N), 1573s, 1547m, 1493m, 1441m, 1379w, 1339s, 1327s, 1285s, 1265w, 1144w, 1117s, 1076w, 1043w, 988m, 912s, 858m, 829m, 768s, 710m, 704s;  $\delta_{\text{H}}$ (300 MHz, CDCl<sub>3</sub>) 4.19 (4H, br s), 3.90-3.87 (4H, m);  $\delta_{\text{C}}$ (125 MHz, CDCl<sub>3</sub>) 165.4 (s), 162.5 (s), 142.7 (s), 126.7 (s), 115.6 (s), 95.1 (s), 66.8 (t, br), 47.7 (t, br); *m/z* (MALDI-TOF) 352 (Se<sup>80</sup>Cl<sup>35</sup>: M<sup>+</sup>+Na, 63%), 330 (MH<sup>+</sup>, 100), 294 (9), 272 (15), 216 (5), 133 (18), 97 (8), 86 (9).

**Method B – non-chromatographic work-up:** To a stirred suspension of 4,6-dichloropyrrolo[2,3-*c*][1,2,6]selenadiazine-5-carbonitrile (**12**) (27.8 mg, 0.10 mmol) in anhydrous DCM (2 mL) at *ca.* 20 °C was added morpholine (19.1  $\mu$ L, 0.22 mmol). The mixture was heated to reflux for 5 min until no starting material remained (TLC) then allowed to cool to *ca.* 20 °C. To the reaction mixture was then added distilled water (60 mL) followed by DCM (30 mL). Phases were separated and the aqueous phase was extracted with DCM (30 mL). The combined organic phases were dried (MgSO<sub>4</sub>), the volatiles removed *in vacuo*, and the residue recrystallized to give the *title compound* **26** (31.9 mg, 97%) as red prisms, mp (hot-stage) 152-158 °C (decomp.) (*c*-Hex/DCE); *R*<sub>f</sub> 0.68 (Hex/DCM/TBME, 20:60:20);  $\nu_{\text{max}}$ /cm<sup>-1</sup>(ATR) 2934w br & 2872w (alkyl C-H), 2208w (C $\equiv$ N), 1573s, 1547m, 1493m, 1441m, 1379w, 1339s, 1327s, 1285s, 1265w, 1144w, 1117s, 1076w, 1043w, 988m, 912s, 858m, 829m, 768s, 710m, 704s; identical to that described above.

### S3.2.16 4-Chloro-6-thiomorpholinopyrrolo[2,3-*c*][1,2,6]selenadiazine-5-carbonitrile (**27**)

**Method A – chromatographic isolation:** To a stirred suspension of 4,6-dichloropyrrolo[2,3-*c*][1,2,6]selenadiazine-5-carbonitrile (**12**) (13.9 mg, 0.05 mmol) in anhydrous DCM (2 mL) at *ca.* 20 °C was added thiomorpholine (11.3  $\mu$ L, 0.11 mmol). The mixture was stirred for 5 min, until no starting material



remained (TLC), adsorbed onto silica and chromatographed (Hex/DCM/TBME, 20:40:40) to give the *title compound 27* (16.5 mg, 96%) as red needles, mp (hot-stage) 168-175 °C (decomp.) (*c*-Hex/DCE);  $R_f$  0.46 (Hex/TBME, 33:67); Anal. Calcd for C<sub>10</sub>H<sub>8</sub>ClN<sub>5</sub>SSe: C, 34.85; H, 2.34; N, 20.32. Found: C, 35.11; H, 2.55; N, 20.01%;  $\lambda_{\max}$ (DCM)/nm 264 inf (log  $\epsilon$  4.22), 269 (4.23), 283 inf (4.04), 312 (3.95), 320 inf (3.92), 403 inf (3.49), 482 (4.07), 504 inf (3.98);  $\nu_{\max}/\text{cm}^{-1}$ (ATR) 2930w (alkyl C-H), 2212w (C $\equiv$ N), 1790w, 1649w, 1580s, 1547m, 1495s, 1454w, 1439w, 1416w, 1337s, 1314m, 1288w, 1273m, 1238w, 1227w, 1204w, 1165w, 1134w, 1036w, 1026w, 957m, 889s, 829w, 814w, 770m, 712m, 704m;  $\delta_{\text{H}}$ (300 MHz, CDCl<sub>3</sub>) 4.45 (4H, br s), 2.88-2.84 (4H, m);  $\delta_{\text{C}}$ (75 MHz, CDCl<sub>3</sub>) 165.2 (s), 162.5 (s), 142.7 (s), 126.8 (s), 115.5 (s), 96.2 (s), 50.8 (t, br), 28.0 (t, br);  $m/z$  (MALDI-TOF) 368 (Se<sup>80</sup>Cl<sup>35</sup>: M<sup>+</sup>+Na, 4%), 346 (MH<sup>+</sup>, 100), 312 (29), 272 (13), 245 (10), 232 (14), 192 (26), 133 (15), 102 (59).

**Method B – non-chromatographic work-up:** To a stirred suspension of 4,6-dichloropyrrolo[2,3-*c*]-[1,2,6]selenadiazine-5-carbonitrile (**12**) (27.8 mg, 0.10 mmol) in anhydrous DCM (2 mL) at *ca.* 20 °C was added thiomorpholine (22.6  $\mu$ L, 0.22 mmol). The mixture was stirred for 5 min until no starting material remained (TLC). The mixture was then diluted with DCM (30 mL) and distilled water (30 mL) was added. Phases were separated and the aqueous phase was twice extracted with DCM (2  $\times$  30 mL). The combined organic phases were dried (MgSO<sub>4</sub>), the volatiles removed *in vacuo*, and the residue recrystallized to give the *title compound 27* (33.4 mg, 97%) as red needles, mp (hot-stage) 168-175 °C (decomp.) (*c*-Hex/DCE);  $R_f$  0.46 (Hex/TBME, 33:67);  $\nu_{\max}/\text{cm}^{-1}$ (ATR) 2930w (alkyl C-H), 2212w (C $\equiv$ N), 1790w, 1649w, 1580s, 1547m, 1495s, 1454w, 1439w, 1416w, 1337s, 1314m, 1288w, 1273m, 1238w, 1227w, 1204w, 1165w, 1134w, 1036w, 1026w, 957m, 889s, 829w, 814w, 770m, 712m, 704m; identical to that described above.

### S3.2.17 4-Chloro-6-(2-methylpiperidin-1-yl)pyrrolo[2,3-*c*][1,2,6]selenadiazine-5-carbonitrile (**28**)

To a stirred suspension of 4,6-dichloropyrrolo[2,3-*c*][1,2,6]selenadiazine-5-carbonitrile (**12**) (27.8 mg, 0.10 mmol) in anhydrous DCM (2 mL) at *ca.* 20 °C was added 2-methylpiperidine (25.8  $\mu$ L, 0.22 mmol). The mixture was stirred for 5 min, until no starting material remained (TLC), adsorbed onto silica and chromatographed (Hex/TBME, 50:50) to give the *title compound 28* (24.5 mg, 72%) as red needles, mp (hot-stage) 145-148 °C (decomp.) (*c*-Hex);  $R_f$  0.43 (Hex/TBME, 50:50); Anal. Calcd for C<sub>12</sub>H<sub>12</sub>ClN<sub>5</sub>Se: C, 42.31; H, 3.55; N, 20.56. Found: C, 41.91; H, 3.33; N, 20.21%;  $\lambda_{\max}$ (DCM)/nm 264 inf (4.22), 268 (4.24), 272 inf (4.22), 283 inf (4.07), 315 (3.98), 403 inf (3.56), 468 inf (3.95), 487 (4.04), 510 inf (3.95);  $\nu_{\max}/\text{cm}^{-1}$ (ATR) 2936w (alkyl C-H), 2208w (C $\equiv$ N), 1574s, 1537w, 1489m, 1443w, 1337m, 1287m, 1188w, 1142w, 1069w, 1040w, 1007w, 989w, 959w, 941w, 889w, 874w, 800w, 758w;  $\delta_{\text{H}}$ (500 MHz,

CDCl<sub>3</sub>) 5.27 (1H, s), 4.87 (1H, d, *J* 13.4), 3.34 (1H, br s), 1.90-1.83 (2H, m), 1.81-1.78 (1H, m), 1.74-1.62 (4H, m), 1.43 (2H, br s);  $\delta_c$ (125 MHz, CDCl<sub>3</sub>) 165.0 (s), 162.8 (s), 142.1 (s), 126.9 (s), 115.7 (s), 95.8 (s), 51.1 (d), 42.9 (t), 30.6 (t), 26.0 (t), 18.5 (q), 16.7 (t); *m/z* (MALDI-TOF) 340 (Se<sup>80</sup>Cl<sup>35</sup>: M<sup>+</sup>-H, 100%), 326 (22), 301 (23), 226 (12), 113 (21), 133 (74), 98 (98), 84 (16).

### S3.2.18 6-(Azepan-1-yl)-4-chloropyrrolo[2,3-*c*][1,2,6]selenadiazine-5-carbonitrile (29)

**Method A – chromatographic isolation:** To a stirred suspension of 4,6-dichloropyrrolo[2,3-*c*][1,2,6]-selenadiazine-5-carbonitrile (**12**) (13.9 mg, 0.05 mmol) in anhydrous DCM (2 mL) at *ca.* 20 °C was added dropwise azepane (12.4  $\mu$ L, 0.11 mmol). The mixture became deep red and was stirred for 5 min, until no starting material remained (TLC), adsorbed onto silica and chromatographed (Hex/TMBE, 33:67) to give the *title compound* **29** (16.5 mg, 97%) as red needles, mp (hot-stage) 139-143 °C (decomp.) (DCE); *R<sub>f</sub>* 0.43 (Hex/TBME, 33:67); Anal. Calcd for C<sub>12</sub>H<sub>12</sub>ClN<sub>5</sub>Se: C, 42.31; H, 3.55; N, 20.56. Found: C, 42.65; H, 3.17; N, 20.91%;  $\lambda_{\max}$ (DCM)/nm 255 inf (log  $\epsilon$  4.31), 269 (4.43), 282 inf (4.28), 312 (4.19), 403 inf (3.76), 463 inf (4.13), 487 (4.25), 512 inf (4.15);  $\nu_{\max}/\text{cm}^{-1}$ (ATR) 2928w & 2853w (alkyl C-H), 2207m (C $\equiv$ N), 1580s, 1547m, 1493w, 1460m, 1454m, 1433w, 1333s, 1287w, 1263w, 1209w, 1165w, 1130w, 1096w, 997w, 966w, 889m, 856w, 825w, 768m, 714m, 706m;  $\delta_H$ (300 MHz, CD<sub>2</sub>Cl<sub>2</sub>) 4.10 (2H, t, *J* 6.0), 3.98 (2H, t, *J* 6.0), 1.98-1.88 (4H, br m), 1.67-1.63 (4H, br m);  $\delta_c$ (125 MHz, TFA-*d*) 157.7 (s), 151.9 (s), 147.8 (s), 126.3 (s), 113.4 (s), 93.6 (s), 56.9 (t), 54.0 (t), 31.0 (t), 28.2 (t), 28.0 (t), 27.5 (t); *m/z* (MALDI-TOF) 342 (Se<sup>80</sup>Cl<sup>35</sup>: MH<sup>+</sup>, 32%), 320 (94), 304 (19), 278 (17), 258 (19), 242 (47), 228 (15), 209 (44), 192 (25), 127 (32), 100 (70), 70 (11).

**Method B – non-chromatographic work-up:** Upon completion, to the reaction mixture was added distilled water (30 mL) followed by DCM (30 mL). Phases were separated and the aqueous phase was extracted with DCM (30 mL). The combined organic phases were dried (MgSO<sub>4</sub>), the volatiles removed *in vacuo*, and the residue recrystallised to give the *title compound* **29** (16.5 mg, 97%) as red needles, mp (hot-stage) 139-143 °C (decomp.) (DCE); *R<sub>f</sub>* 0.43 (Hex/TBME, 33:67);  $\nu_{\max}/\text{cm}^{-1}$ (ATR) 2928w & 2853w (alkyl C-H), 2207m (C $\equiv$ N), 1580s, 1547m, 1493w, 1460m, 1454m, 1433w, 1333s, 1287w, 1263w, 1209w, 1165w, 1130w, 1096w, 997w, 966w, 889m, 856w, 825w, 768m, 714m, 706m; identical to that described above.

### S3.2.19 4-Chloro-6-(dibenzylamino)pyrrolo[2,3-*c*][1,2,6]selenadiazine-5-carbonitrile (30)

To a stirred suspension of 4,6-dichloropyrrolo[2,3-*c*][1,2,6]selenadiazine-5-carbonitrile (**12**) (14.1 mg, 0.05 mmol) in anhydrous DCM (2 mL) at *ca.* 20 °C was added dibenzylamine (27.3  $\mu$ L, 0.25 mmol). The mixture was stirred for 4 h, until no starting material remained (TLC), adsorbed onto silica and

chromatographed (Hex/TBME, 50:50) to give the *title compound* **30** (18.4 mg, 83%) as red needles, mp (hot-stage) 144-146 °C (decomp.) (*c*-Hex);  $R_f$  0.65 (Hex/TBME, 50:50); Anal. Calcd for  $C_{20}H_{14}ClN_5Se$ : C, 54.75; H, 3.22; N, 15.96. Found: C, 54.42; H, 2.85; N, 16.23%;  $\lambda_{max}(DCM)/nm$  265 (log  $\epsilon$  4.38), 269 (4.38), 281 inf (4.23), 310 (4.10), 322 inf (4.02), 407 inf (3.69), 476 (4.21), 500 inf (4.13);  $\nu_{max}/cm^{-1}(ATR)$  3063w br (aryl C-H), 2934w (alkyl C-H), 2212w (C $\equiv$ N), 1574s, 1551w, 1497m, 1445m, 1429w, 1341s, 1300w, 1254w, 1227w, 1200w, 1138w, 1080w, 1030w, 970w, 928w, 899w, 854w, 777w, 750w, 735w, 718w, 698w;  $\delta_H(300\text{ MHz, }CDCl_3)$  7.38-7.31 (10H, br m), 5.12 (4H, br s);  $\delta_C(125\text{ MHz, }CDCl_3)$  C (d) resonances overlapping 166.8 (s), 162.8 (s), 142.7 (s), 135.3 (s), 129.2 (d, br), 128.4 (d), 127.1 (s), 115.3 (s), 95.6 (s), 53.8 (t, br), 51.2 (t, br);  $m/z$  (MALDI-TOF) 438 ( $Se^{80}Cl^{35}$ :  $M^+-H$ , 21%), 348 (45), 194 (16), 181 (14), 133 (36), 97 (14), 91 (100).

### S3.2.20 4-Chloro-6-[methyl(phenyl)amino]pyrrolo[2,3-*c*][1,2,6]selenadiazine-5-carbonitrile (**31**)

**Method A – chromatographic isolation:** To a stirred suspension of 4,6-dichloropyrrolo[2,3-*c*][1,2,6]selenadiazine-5-carbonitrile (**12**) (27.8 mg, 0.10 mmol) in anhydrous DCM (2 mL) at *ca.* 20 °C was added *N*-methylaniline (23.8  $\mu$ L, 0.22 mmol). The mixture was stirred for 5 min, until no starting material remained (TLC), adsorbed onto silica and chromatographed (Hex/DCM/TBME, 33:33:33) to give the *title compound* **31** (34.2 mg, 98%) as red plates, mp (hot stage) 173.3-178.6 °C (decomp.) (*c*-Hex/DCE);  $R_f$  0.39 (Hex/DCM/TBME, 50:25:25); Anal. Calcd for  $C_{13}H_8ClN_5Se$ : C, 44.78; H, 2.31; N, 20.09. Found: C, 45.03; H, 2.17; N, 20.27%;  $\lambda_{max}(DCM)/nm$  264 inf (log  $\epsilon$  4.61), 269 (4.63), 313 (4.28), 469 (452), 487 inf (4.50);  $\nu_{max}/cm^{-1}(ATR)$  3067w (aryl C-H), 2928w (alkyl C-H), 2212w (C $\equiv$ N), 1572s, 1495m, 1485s, 1454w, 1402m, 1331s, 1234m, 1165w, 1119w, 1078w, 1049w, 1026w, 978w, 916w, 878m, 777m, 756m, 712m;  $\delta_H(300\text{ MHz, }CDCl_3)$  7.56-7.53 (3H, m), 7.40-7.37 (2H, m), 3.76 (3H, s);  $\delta_C(125\text{ MHz, }CDCl_3)$  166.4 (s), 163.1 (s), 142.9 (s), 142.5 (s), 130.5 (s), 130.0 (s), 127.5 (s), 126.0 (s), 112.2 (s), 98.0 (s), 42.8 (q);  $m/z$  (MALDI-TOF) 472 ( $Se^{80}Cl^{35}$ :  $M^++Na$ , 11%), 350 ( $MH^+$ , 23), 348 ( $M^+-H$ , 26), 313 (4), 234 (30), 199 (5), 133 (5), 106 (6), 97 (10), 81 (9), 39 (100).

**Method B – non-chromatographic work-up:** To a stirred suspension of 4,6-dichloropyrrolo[2,3-*c*][1,2,6]selenadiazine-5-carbonitrile (**12**) (13.9 mg, 0.05 mmol) in anhydrous DCM (1 mL) at *ca.* 20 °C was added *N*-methylaniline (11.9  $\mu$ L, 0.11 mmol). The mixture was stirred for 5 min, until no starting material remained (TLC). The reaction mixture was diluted with DCM (20 mL) and distilled water (40 mL) was added. The layers were separated, and the aqueous phase was extracted with DCM (2  $\times$  20 mL). The combined organic phases were dried ( $MgSO_4$ ), the volatiles removed *in vacuo*, and the residue recrystallised to give the *title compound* **31** (17.3 mg, 99%) as red plates, mp (hot stage) 173.3-178.6 °C

(decomp.) (*c*-Hex/DCE);  $R_f$  0.39 (Hex/DCM/TBME, 50:25:25);  $\nu_{\max}/\text{cm}^{-1}$ (ATR) 3067w (aryl C-H), 2928w (alkyl C-H), 2212w (C $\equiv$ N), 1572s, 1495m, 1485s, 1454w, 1402m, 1331s, 1234m, 1165w, 1119w, 1078w, 1049w, 1026w, 978w, 916w, 878m, 777m, 756m, 712m; identical to that described above.

### S3.2.21 4-Chloro-6-(diphenylamino)pyrrolo[2,3-*c*][1,2,6]selenadiazine-5-carbonitrile (**32**)

To a stirred suspension of 4,6-dichloropyrrolo[2,3-*c*][1,2,6]selenadiazine-5-carbonitrile (**12**) (55.6 mg, 0.20 mmol) in anhydrous DCM (4 mL) at *ca.* 20 °C was added diphenylamine (74.4 mg, 0.44 mmol). The mixture was stirred for 3 h, until no starting material remained (TLC), adsorbed onto silica and chromatographed (Hex/DCM/TBME, 60:20:20) to give the *title compound* **32** (75.5 mg, 93%) as red needles, mp (hot-stage) 122.0-126.5 °C (*c*-Hex/DCE);  $R_f$  0.70 (Hex/DCM/TBME, 33:33:34); Anal. Calcd for C<sub>18</sub>H<sub>10</sub>ClN<sub>5</sub>Se: C, 52.64; H, 2.45; N, 17.05. Found: C, 52.97; H, 2.25; N, 17.00%;  $\lambda_{\max}$ (DCM)/nm 261 inf (log  $\epsilon$  4.60), 268 inf (4.66), 271 (4.68), 278 (4.71), 284 inf (4.69), 352 inf (3.86), 487 (3.18);  $\nu_{\max}/\text{cm}^{-1}$ (ATR) 2212w (C $\equiv$ N), 1591w, 1557s, 1493m, 1468m, 1441s, 1337s, 1256w, 1192w, 1173w, 1117w, 1078w, 1026w, 1005w, 922w, 907w, 893w, 826w, 758w, 750m, 712m;  $\delta_{\text{H}}$ (300 MHz, CDCl<sub>3</sub>) 7.50-7.26 (10H, m);  $\delta_{\text{C}}$ (75 MHz, CDCl<sub>3</sub>) 166.8 (s), 163.1 (s), 143.6 (s), 142.9 (s), 130.1 (d), 128.6 (d), 127.2 (d), 125.4 (s), 112.0 (s), 99.5 (s);  $m/z$  (MALDI-TOF) 434 (Se<sup>80</sup>Cl<sup>35</sup>: M<sup>+</sup>+Na, 28%), 412 (MH<sup>+</sup>, 65), 296 (34), 242 (100), 197 (13), 184 (12), 150 (20), 142 (17), 100 (34), 86 (17).

### S3.2.22 Displacement of the 4-chloride

#### Reaction of 4-chloro-6-morpholinopyrrolo[2,3-*c*][1,2,6]selenadiazine-5-carbonitrile (**26**) with morpholine

**Method A:** To a stirred suspension of 4-chloro-6-morpholinopyrrolo[2,3-*c*][1,2,6]selenadiazine-5-carbonitrile (**26**) (34.5 mg, 0.10 mmol) in anhydrous DCM (3 mL) at *ca.* 20 °C, was added morpholine (172  $\mu$ L, 2.00 mmol). The reaction mixture was heated to *ca.* 40 °C for 24 h, until no starting material remained (TLC). The reaction was then allowed to cool to *ca.* 20 °C, diluted with DCM (10 mL) and extracted with distilled water (40 mL). The aqueous phase was then extracted with DCM (2  $\times$  20 mL), and the combined organic phases were dried (MgSO<sub>4</sub>), filtered, adsorbed onto silica and chromatographed (Hex/DCM/TBME, 20:40:40) to give 4,6-dimorpholinopyrrolo[2,3-*c*][1,2,6]selenadiazine-5-carbonitrile (**33**) (3.0 mg, 8%) as red prisms, mp (hot-stage) 172-175 °C (*c*-Hex/DCE) (decomp.);  $R_f$  0.40 (DCM/TBME, 50:50); Anal. Calcd for C<sub>14</sub>H<sub>16</sub>N<sub>6</sub>O<sub>2</sub>Se: C, 44.33; H, 4.25; N, 22.16. Found: C, 44.21; H, 4.53; N, 22.44%;  $\lambda_{\max}$ (DCM)/nm 254 (log  $\epsilon$  4.36), 267 inf (4.22), 313 (4.15), 360 (3.51), 504 (4.18);  $\nu_{\max}/\text{cm}^{-1}$ (ATR) 2972w & 2866w (alkyl C-H), 2207w (C $\equiv$ N), 1557s, 1487w, 1454m, 1445m, 1396w, 1364w, 1323m, 1283s, 1261m, 1192w, 1159w, 1117s, 1065w, 1018w, 974m, 924w,

895w, 862m, 843w, 775w, 760w, 718w;  $\delta_{\text{H}}$ (300 MHz,  $\text{CDCl}_3$ ) 4.11 (4H, t,  $J$  4.5), 3.98 (4H, t,  $J$  4.5), 3.86 (4H, t,  $J$  5.1), 3.34 (4H, t,  $J$  4.8);  $\delta_{\text{C}}$ (75 MHz,  $\text{CDCl}_3$ ) 165.3 (s), 165.2 (s), 157.8 (s), 122.8 (s), 116.8 (s), 91.5 (s), 66.8 (t), 66.0 (t), 50.6 (t), 47.6 (t);  $m/z$  (MALDI-TOF) 382 ( $\text{Se}^{80}$ :  $\text{M}^+ + 2\text{H}$ , 100%), 380 ( $\text{M}^+$ , 53), 375 (22), 339 (21), 320 (22), 309 (38), 302 (51), 295 (42), 281 (28), 278 (47), 213 (23), 101 (30). Further elution (Hex/DCM/TBME, 10:45:45) afforded 2,5-dimorpholino-3-oxo-3H-pyrrole-4-carbonitrile (**34**) (3.5 mg, 13%) as orange needles, mp (hot-stage) 247-250 °C (*c*-Hex/DCE);  $R_f$  0.65 (Hex/EtOAc, 10:90); Anal. Calcd for  $\text{C}_{13}\text{H}_{16}\text{N}_4\text{O}_3$ : C, 56.51; H, 5.84; N, 20.28. Found: C, 56.28; H, 6.00; N, 20.51%;  $\lambda_{\text{max}}$ (DCM)/nm 311 inf (log  $\epsilon$  4.39), 332 inf (4.15), 427 (3.15);  $\nu_{\text{max}}$ /cm $^{-1}$ (ATR) 2926w & 2866w (alkyl C-H), 2191w (C $\equiv$ N), 1667w, 1630w, 1557s, 1423m, 1393w, 1366w, 1357w, 1339w, 1306w, 1269m, 1252s, 1213w, 1138w, 1109s, 1067w, 1028w, 974m, 926w, 895m, 858m, 785w, 718m;  $\delta_{\text{H}}$ (300 MHz,  $\text{CDCl}_3$ ) 4.54 (2H, t,  $J$  4.8), 4.13 (2H, t,  $J$  4.8), 4.03 (2H, t,  $J$  4.8), 3.86-3.76 (10H, m);  $\delta_{\text{C}}$ (125 MHz,  $\text{CDCl}_3$ ) 182.4 (s), 174.9 (s), 163.0 (s), 117.0 (s), 68.6 (s), 67.4 (t), 67.0 (t), 66.73 (t), 66.70 (t), 48.3 (t), 47.5 (t), 47.1 (t), 45.1 (t);  $m/z$  (MALDI-TOF) 315 ( $\text{M}^+ + \text{K}$ , 29%), 299 ( $\text{M}^+ + \text{Na}$ , 59), 277 ( $\text{MH}^+$ , 100), 212 (59), 150 (28), 133 (54), 86 (8), 39 (60). Further elution (Hex/DCM/EtOAc, (Hex/DCM/THF, 20:20:60) gave 3,5-dimorpholino-2-oxo-2H-pyrrole-4-carbonitrile (**35**) (15.5 mg, 55%) as yellow prisms, mp (hot-stage) 225-232 °C (*c*-Hex/DCE);  $R_f$  0.26 (Hex/EtOAc, 5:95); Anal. Calcd for  $\text{C}_{13}\text{H}_{16}\text{N}_4\text{O}_3$ : C, 56.51; H, 5.84; N, 20.28. Found: C, 56.30; H, 5.72; N, 19.88%;  $\lambda_{\text{max}}$ (DCM)/nm 303 inf (log  $\epsilon$  3.18), 312 (3.21), 325 inf (3.10), 416 (2.34);  $\nu_{\text{max}}$ /cm $^{-1}$ (ATR) 2924w & 2870w (alkyl C-H), 2185w (C $\equiv$ N), 1694w, 1614w, 1557s, 1470w, 1441w, 1391w, 1371w, 1327m, 1306w, 1267m, 1231w, 1161w, 1111m, 1063w, 1026m, 976w, 932w, 903w, 858m, 789w, 714w;  $\delta_{\text{H}}$ (300 MHz,  $\text{CDCl}_3$ ) 4.62 (2H, t,  $J$  4.2), 4.16 (2H, t,  $J$  4.5), 4.06 (4H, t,  $J$  4.8), 3.90 (2H, t,  $J$  4.5), 3.84-3.78 (6H, m);  $\delta_{\text{C}}$ (75 MHz,  $\text{CDCl}_3$ ) 173.7 (s), 173.3 (s), 159.4 (s), 117.7 (s), 68.4 (s), 67.7 (t), 66.9 (t), 66.84 (t), 66.75 (t), 50.6 (t), 48.8 (t), 48.0 (t), 47.9 (t);  $m/z$  (MALDI-TOF) 299 ( $\text{M}^+ + \text{Na}$ , 11%), 277 ( $\text{MH}^+$ , 100), 251 (10), 234 (7), 219 (4), 150 (10), 86 (5), 39 (9).

**Method B** – To a stirred solution of 4-chloro-6-morpholinopyrrolo[2,3-*c*][1,2,6]selenadiazine-5-carbonitrile (**26**) (69.0 mg, 0.20 mmol) in anhydrous toluene (16 mL) at *ca.* 80 °C was added morpholine (37.9  $\mu\text{L}$ , 0.44 mmol). After 24 h, morpholine (37.9  $\mu\text{L}$ , 0.44 mmol) was added and the reaction was left to stir at *ca.* 80 °C until no starting material remained (TLC). After a total of 72 h, volatiles were removed *in vacuo*, dissolved in DCM (25 mL) and filtered through fluted filter paper. The filtrate was then concentrated and chromatographed (Hex/DCM/TBME, 40:30:30) to give 4,6-dimorpholinopyrrolo[2,3-*c*][1,2,6]selenadiazine-5-carbonitrile (**33**) (16.4 mg, 22%) as red prisms, mp (hot-stage) 172-175 °C (*c*-Hex/DCE) (decomp.);  $R_f$  0.40 (DCM/TBME, 50:50);  $\nu_{\text{max}}$ /cm $^{-1}$ (ATR) 2972w & 2866w (alkyl C-H), 2207w (C $\equiv$ N), 1557s, 1487w, 1454m, 1445m, 1396w, 1364w, 1323m, 1283s, 1261m, 1192w, 1159w,

1117s, 1065w, 1018w, 974m, 924w, 895w, 862m, 843w, 775w, 760w, 718w; identical to that described above.

### S3.3 Section references

1. Hardwood, L. M. Dry-Column Flash Chromatography. *Aldrichimica Acta* **1985**, *18*, 25-25.
2. Carboni, R. A. TETRACYANOETHYLENE. *Org. Synth.* **1959**, *39*, 64-67.
3. Amosova, S. V.; Penzik, M. V.; Albanov, A. I.; Potapov, V. A. The reaction of selenium dichloride with divinyl sulfide. *J. Organomet. Chem.* **2009**, *694*, 3369–3372.

**S4 NMR Spectra**

4,6-Dichloropyrrolo[2,3-c][1,2,6]selenadiazine-5-carbonitrile 12

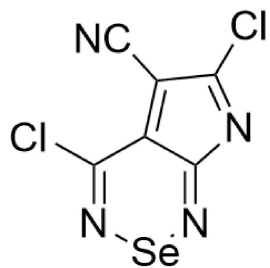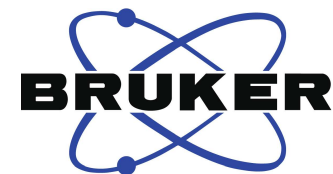

Current Data Parameters  
 NAME nmr 500  
 EXPNO 151  
 PROCNO 1

F2 - Acquisition Parameters  
 Date\_ 20230812  
 Time\_ 20.07 h  
 INSTRUM spect  
 PROBHD z113652\_0078 (  
 PULPROG zg30  
 TD 65536  
 SOLVENT CD2Cl2  
 NS 16  
 DS 2  
 SWH 10000.000 Hz  
 FIDRES 0.305176 Hz  
 AQ 3.2767999 sec  
 RG 287  
 DW 50.000 usec  
 DE 13.55 usec  
 TE 298.9 K  
 D1 1.00000000 sec  
 TD0 1  
 SFO1 500.0360877 MHz  
 NUC1 1H  
 P0 4.00 usec  
 P1 12.00 usec  
 PLW1 16.34900093 W

F2 - Processing parameters  
 SI 65536  
 SF 500.0330206 MHz  
 WDW EM  
 SSB 0  
 LB 0.30 Hz  
 GB 0  
 PC 1.00

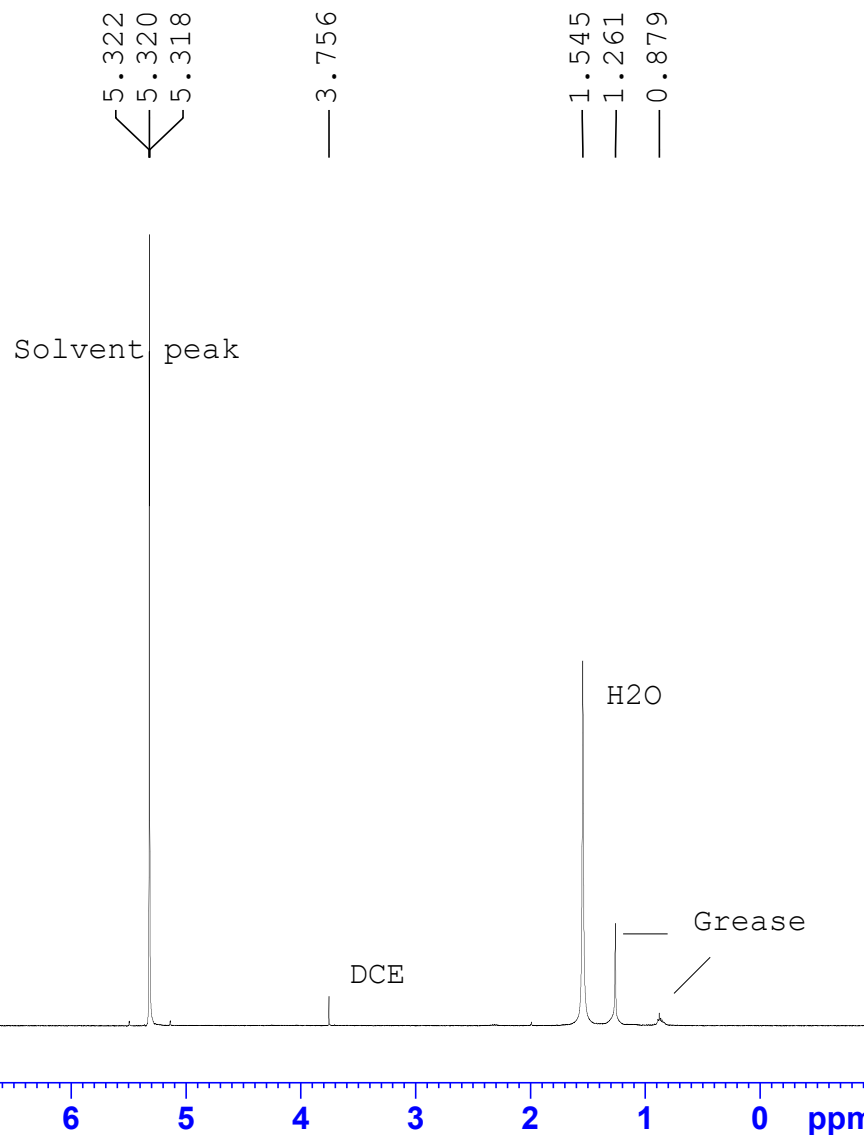



4,6-Dichloropyrrolo[2,3-c][1,2,6]selenadiazine-5-carbonitrile 12

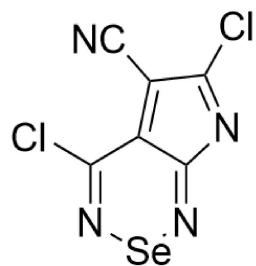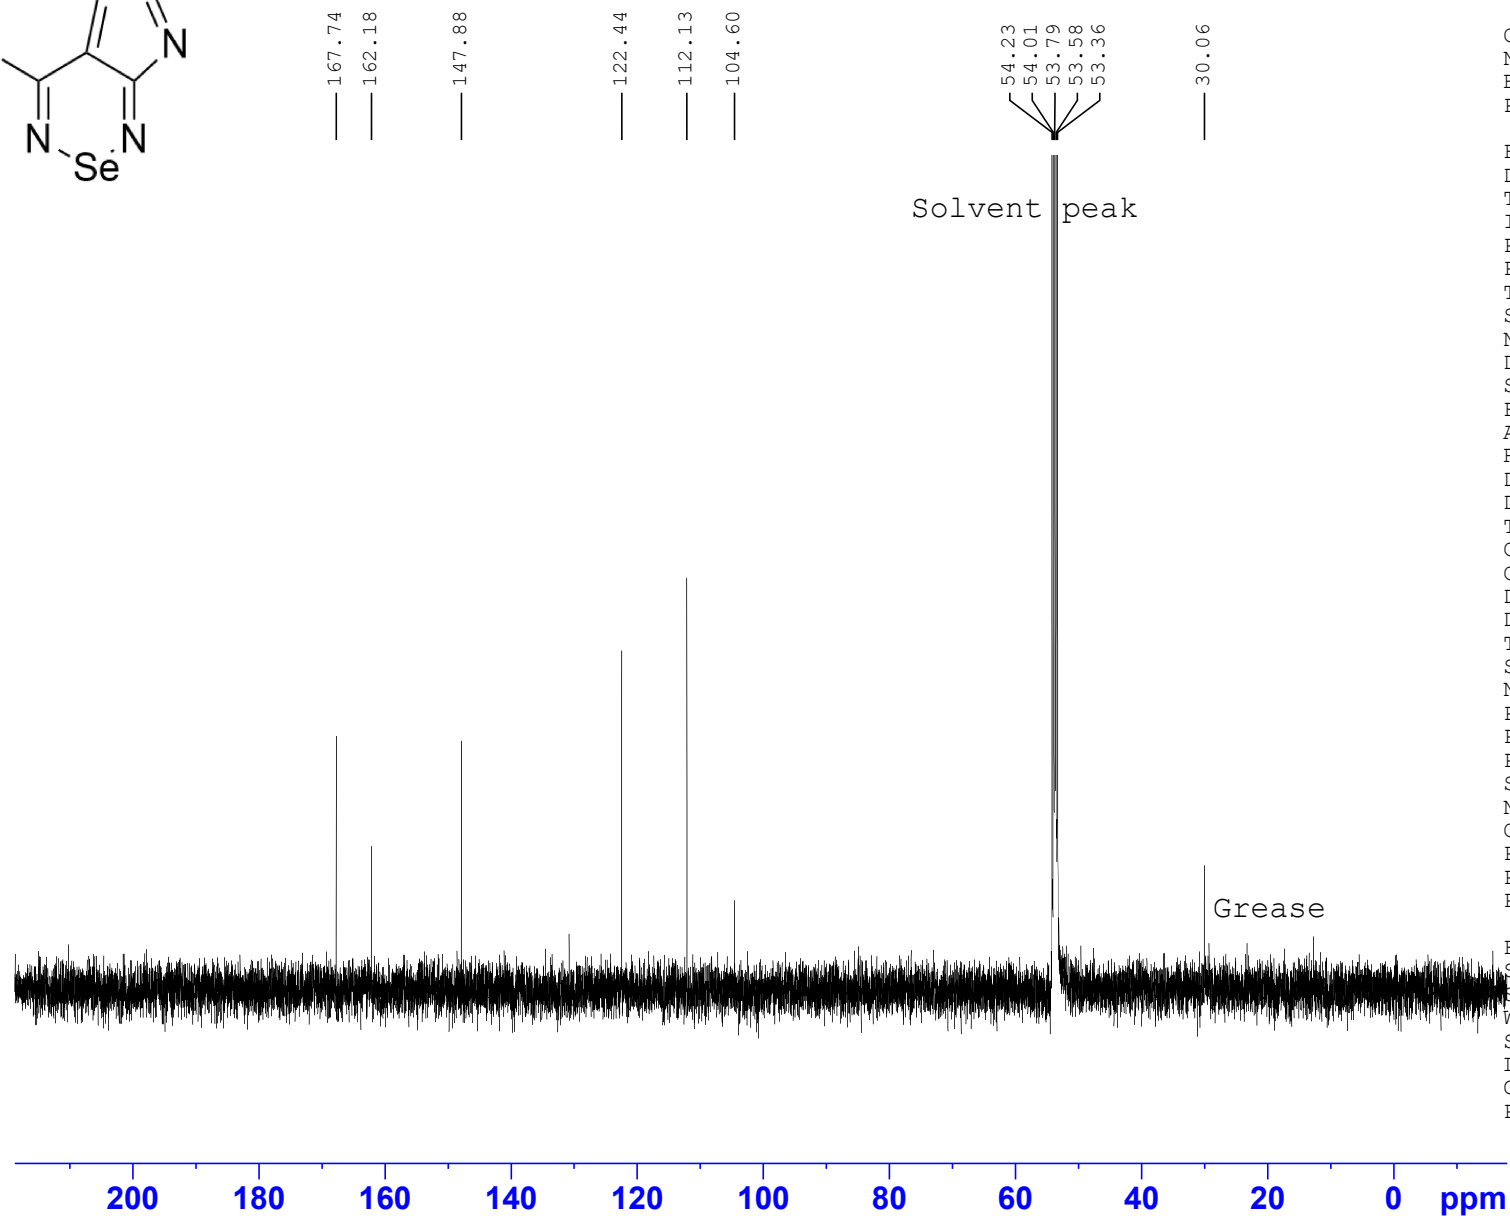

Current Data Parameters  
 NAME nmr 500  
 EXPNO 157  
 PROCNO 1

F2 - Acquisition Parameters  
 Date\_ 20230813  
 Time\_ 22.54 h  
 INSTRUM spect  
 PROBHD z113652\_0078 (  
 PULPROG jmod  
 TD 65536  
 SOLVENT CD2Cl2  
 NS 13312  
 DS 4  
 SWH 29761.904 Hz  
 FIDRES 0.908261 Hz  
 AQ 1.1010048 sec  
 RG 2050  
 DW 16.800 usec  
 DE 6.50 usec  
 TE 299.9 K  
 CNST2 145.000000  
 CNST11 1.000000  
 D1 6.0000000 sec  
 D20 0.00689655 sec  
 TD0 1  
 SFO1 125.7459712 MHz  
 NUC1 13C  
 P1 10.00 usec  
 P2 20.00 usec  
 PLW1 121.3600061 W  
 SFO2 500.0350001 MHz  
 NUC2 1H  
 CPDPRG[2] waltz65  
 PCPD2 80.00 usec  
 PLW2 16.34900093 W  
 PLW12 0.34647381 W

F2 - Processing parameters  
 SI 32768  
 SF 125.7333492 MHz  
 WDW EM  
 SSB 0  
 LB 1.00 Hz  
 GB 0  
 PC 1.40

4-Chloro-6-oxo-6,7-dihydropyrrolo[2,3-c][1,2,6]selenadiazine-5-carbonitrile 13

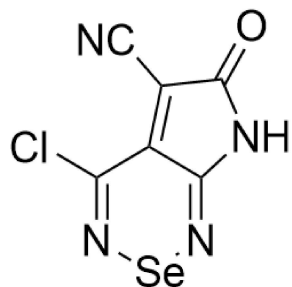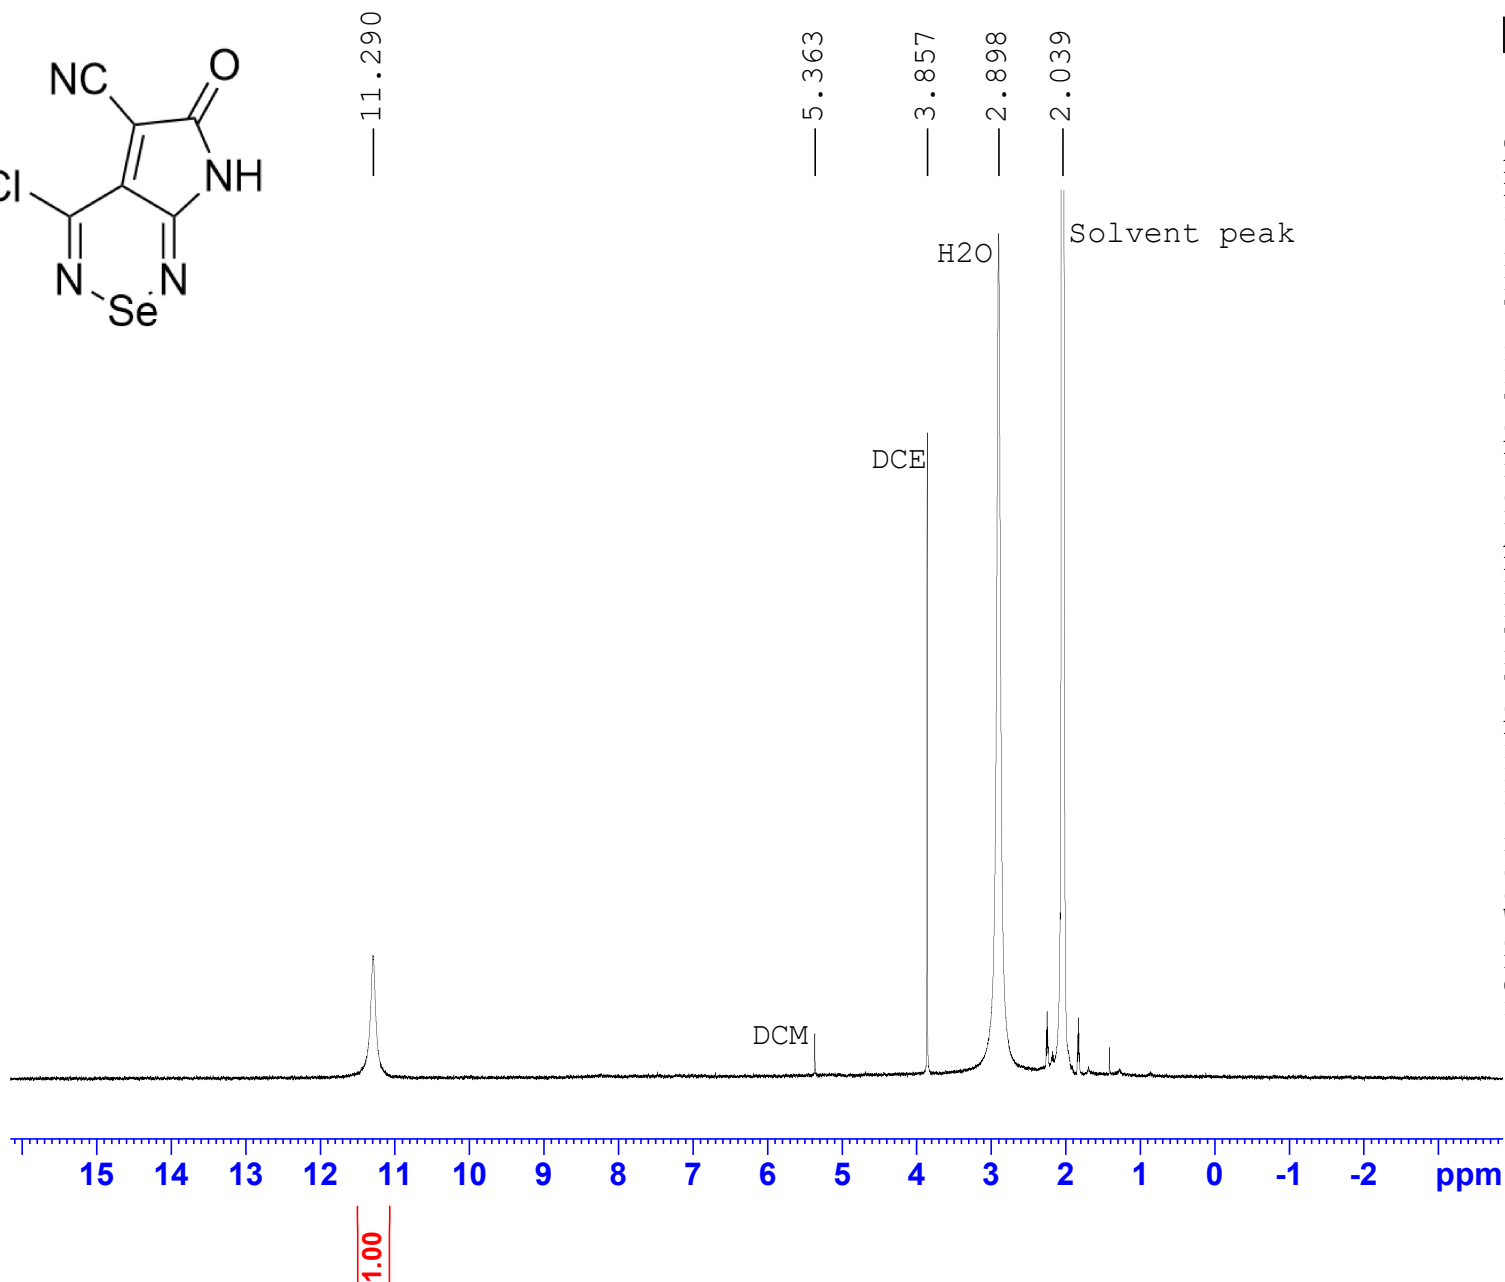

Current Data Parameters  
 NAME NMR 300  
 EXPNO 261  
 PROCNO 1

F2 - Acquisition Parameters  
 Date\_ 20230812  
 Time\_ 13.52 h  
 INSTRUM spect  
 PROBHD z104275\_0375 (  
 PULPROG zg30  
 TD 65536  
 SOLVENT Acetone  
 NS 64  
 DS 2  
 SWH 6009.615 Hz  
 FIDRES 0.183399 Hz  
 AQ 5.4525952 sec  
 RG 201.81  
 DW 83.200 usec  
 DE 13.19 usec  
 TE 297.0 K  
 D1 1.00000000 sec  
 TD0 1  
 SFO1 300.1318533 MHz  
 NUC1 1H  
 P0 4.67 usec  
 P1 14.00 usec  
 PLW1 7.09999990 W

F2 - Processing parameters  
 SI 65536  
 SF 300.1300084 MHz  
 WDW EM  
 SSB 0  
 LB 0.30 Hz  
 GB 0  
 PC 1.00

4-Chloro-6-oxo-6,7-dihydropyrrolo[2,3-c][1,2,6]selenadiazine-5-carbonitrile 13

D2O wash in Acetone-d6

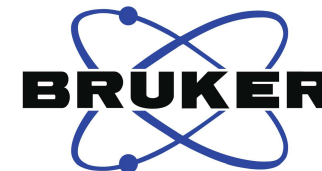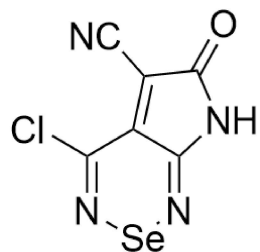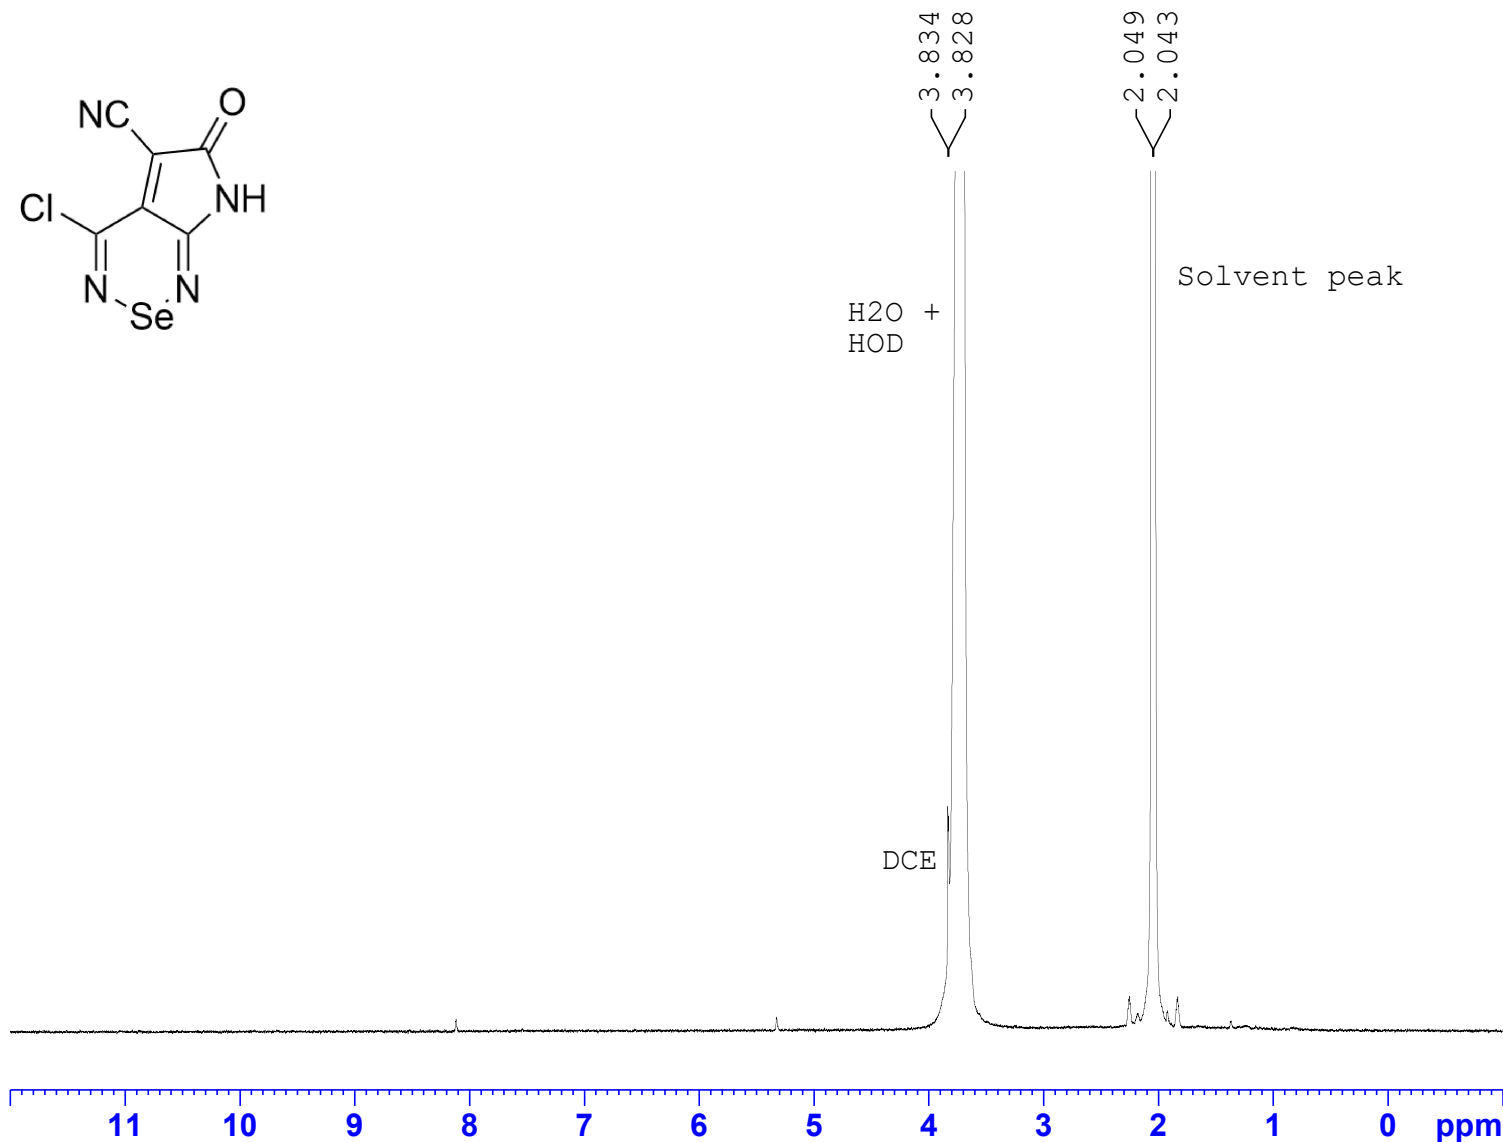

Current Data Parameters  
NAME NMR 300  
EXPNO 262  
PROCNO 1

F2 - Acquisition Parameters  
Date\_ 20230812  
Time 14.21 h  
INSTRUM spect  
PROBHD z104275\_0375 (  
PULPROG zg30  
TD 65536  
SOLVENT Acetone  
NS 64  
DS 2  
SWH 6009.615 Hz  
FIDRES 0.183399 Hz  
AQ 5.4525952 sec  
RG 201.81  
DW 83.200 usec  
DE 13.19 usec  
TE 297.0 K  
D1 1.00000000 sec  
TD0 1  
SFO1 300.1318533 MHz  
NUC1 1H  
P0 4.67 usec  
P1 14.00 usec  
PLW1 7.09999990 W

F2 - Processing parameters  
SI 65536  
SF 300.1300068 MHz  
WDW EM  
SSB 0  
LB 0.30 Hz  
GB 0  
PC 1.00

4-Chloro-6-oxo-6,7-dihydropyrrolo[2,3-c][1,2,6]selenadiazine-5-carbonitrile (13)

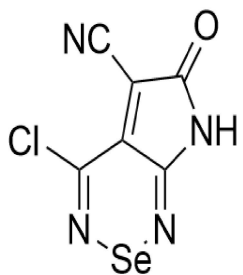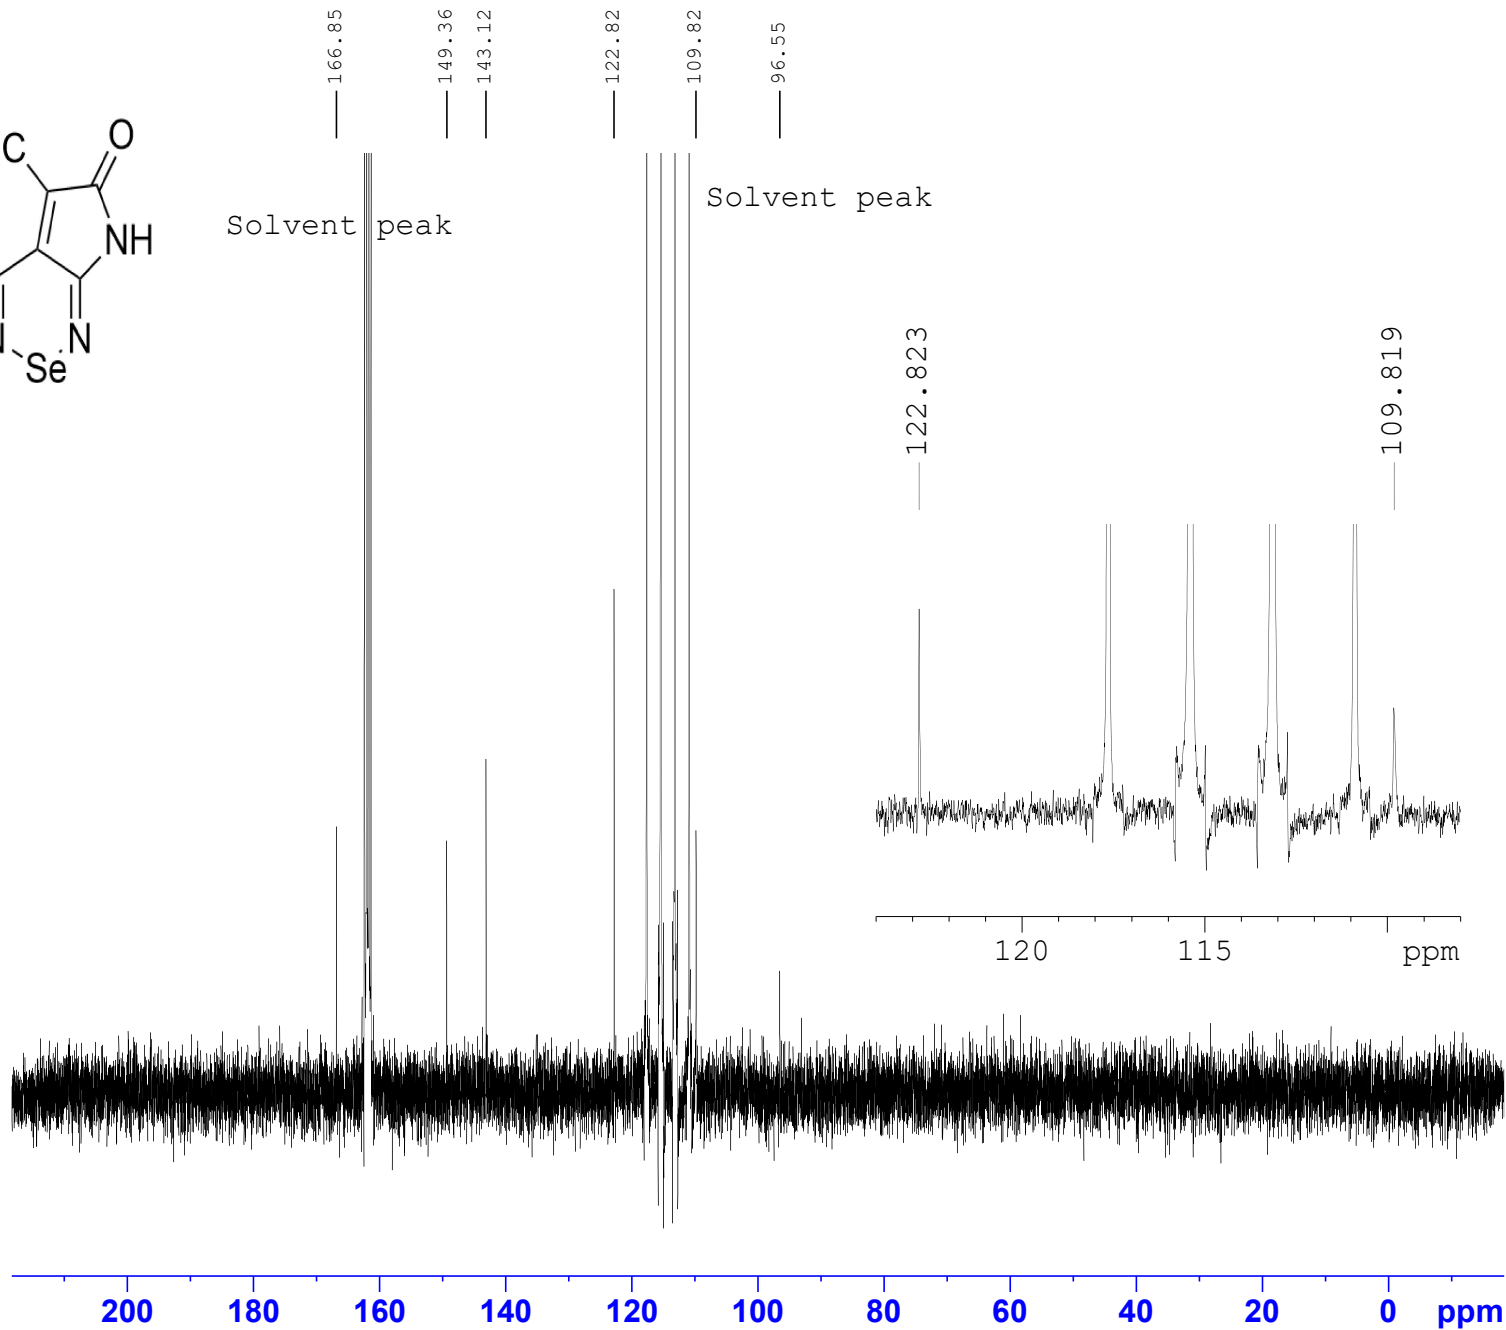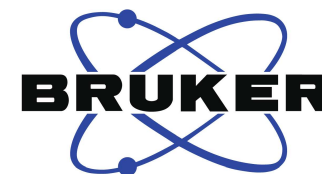

Current Data Parameters  
 NAME nmr 500  
 EXPNO 150  
 PROCNO 1

F2 - Acquisition Parameters  
 Date\_ 20230812  
 Time\_ 8.18 h  
 INSTRUM spect  
 PROBHD z113652\_0078 (  
 PULPROG jmod  
 TD 65536  
 SOLVENT TFA2  
 NS 11264  
 DS 4  
 SWH 29761.904 Hz  
 FIDRES 0.908261 Hz  
 AQ 1.1010048 sec  
 RG 2050  
 DW 16.800 usec  
 DE 6.50 usec  
 TE 301.9 K  
 CNST2 145.000000  
 CNST11 1.0000000  
 D1 2.0000000 sec  
 D20 0.00689655 sec  
 TD0 1  
 SFO1 125.7459712 MHz  
 NUC1 13C  
 P1 10.00 usec  
 P2 20.00 usec  
 PLW1 121.36000061 W  
 SFO2 500.0350001 MHz  
 NUC2 1H  
 CPDPRG[2] waltz65  
 PCPD2 80.00 usec  
 PLW2 16.34900093 W  
 PLW12 0.34647381 W

F2 - Processing parameters  
 SI 32768  
 SF 125.7333979 MHz  
 WDW EM  
 SSB 0  
 LB 1.00 Hz  
 GB 0  
 PC 1.40

4-Chloro-6-methoxypyrrolo[2,3-c][1,2,6]selenadiazine-5-carbonitrile 14

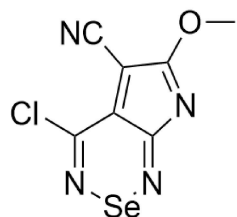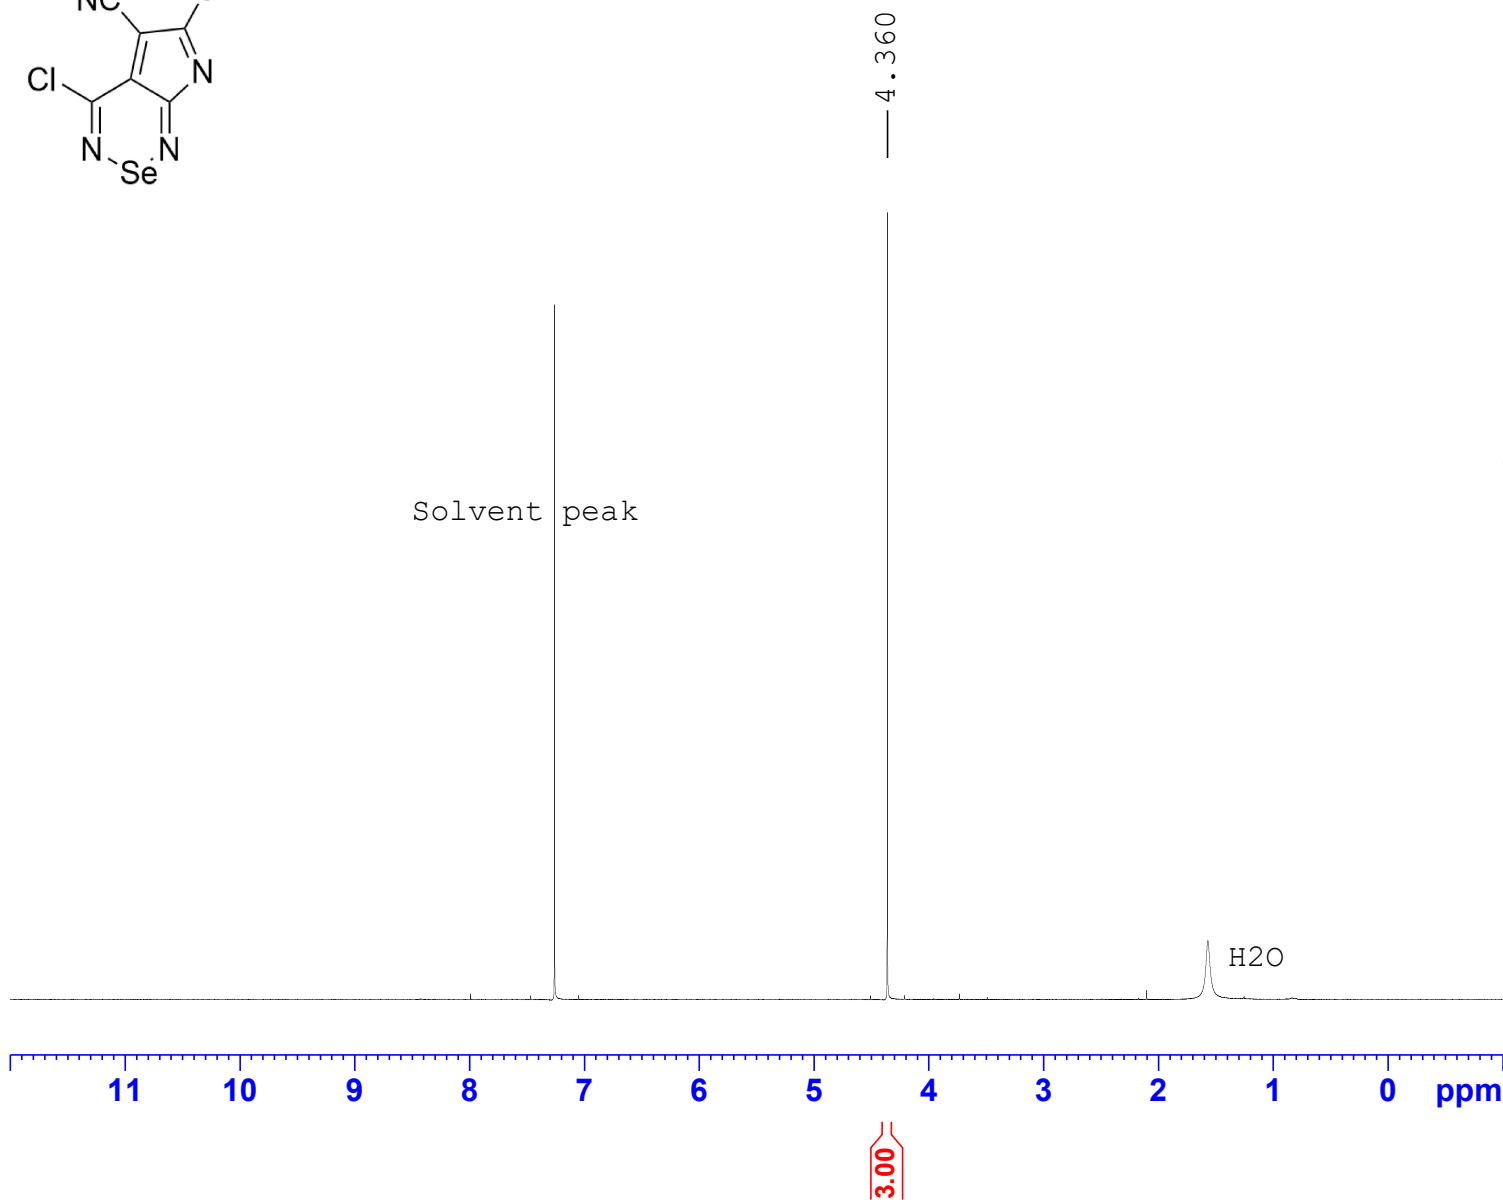

Current Data Parameters  
NAME nmr 500  
EXPNO 124  
PROCNO 1

F2 - Acquisition Parameters  
Date\_ 20230731  
Time\_ 9.44 h  
INSTRUM spect  
PROBHD z113652\_0078 (  
PULPROG zg30  
TD 65536  
SOLVENT CDCl3  
NS 16  
DS 2  
SWH 10000.000 Hz  
FIDRES 0.305176 Hz  
AQ 3.2767999 sec  
RG 256  
DW 50.000 usec  
DE 13.55 usec  
TE 299.5 K  
D1 1.00000000 sec  
TD0 1  
SFO1 500.0360877 MHz  
NUC1 1H  
P0 4.00 usec  
P1 12.00 usec  
PLW1 16.34900093 W

F2 - Processing parameters  
SI 65536  
SF 500.0330123 MHz  
WDW EM  
SSB 0  
LB 0.30 Hz  
GB 0  
PC 1.00

4-Chloro-6-methoxypyrrolo[2,3-c][1,2,6]selenadiazine-5-carbonitrile 14

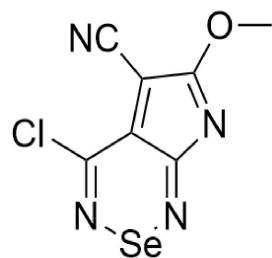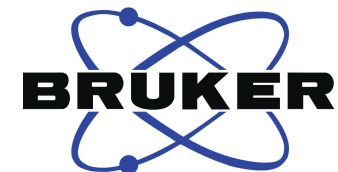

Current Data Parameters  
 NAME NMR 300  
 EXPNO 237  
 PROCNO 1

F2 - Acquisition Parameters  
 Date\_ 20230718  
 Time\_ 9.01 h  
 INSTRUM spect  
 PROBHD Z104275\_0375 (  
 PULPROG jmod  
 TD 65536  
 SOLVENT TFA-d  
 NS 10240  
 DS 4  
 SWH 18115.941 Hz  
 FIDRES 0.552855 Hz  
 AQ 1.8087935 sec  
 RG 201.81  
 DW 27.600 usec  
 DE 6.50 usec  
 TE 301.4 K  
 CNST2 145.000000  
 CNST11 1.000000  
 D1 2.0000000 sec  
 D20 0.00689655 sec  
 TD0 1  
 SFO1 75.4752953 MHz  
 NUC1 13C  
 P1 10.00 usec  
 P2 20.00 usec  
 PLW1 45.0000000 W  
 SFO2 300.1312005 MHz  
 NUC2 1H  
 CPDPRG[2] waltz65  
 PCPD2 90.00 usec  
 PLW2 7.09999990 W  
 PLW12 0.17180000 W

F2 - Processing parameters  
 SI 32768  
 SF 75.4677485 MHz  
 WDW EM  
 SSB 0  
 LB 1.00 Hz  
 GB 0  
 PC 1.40

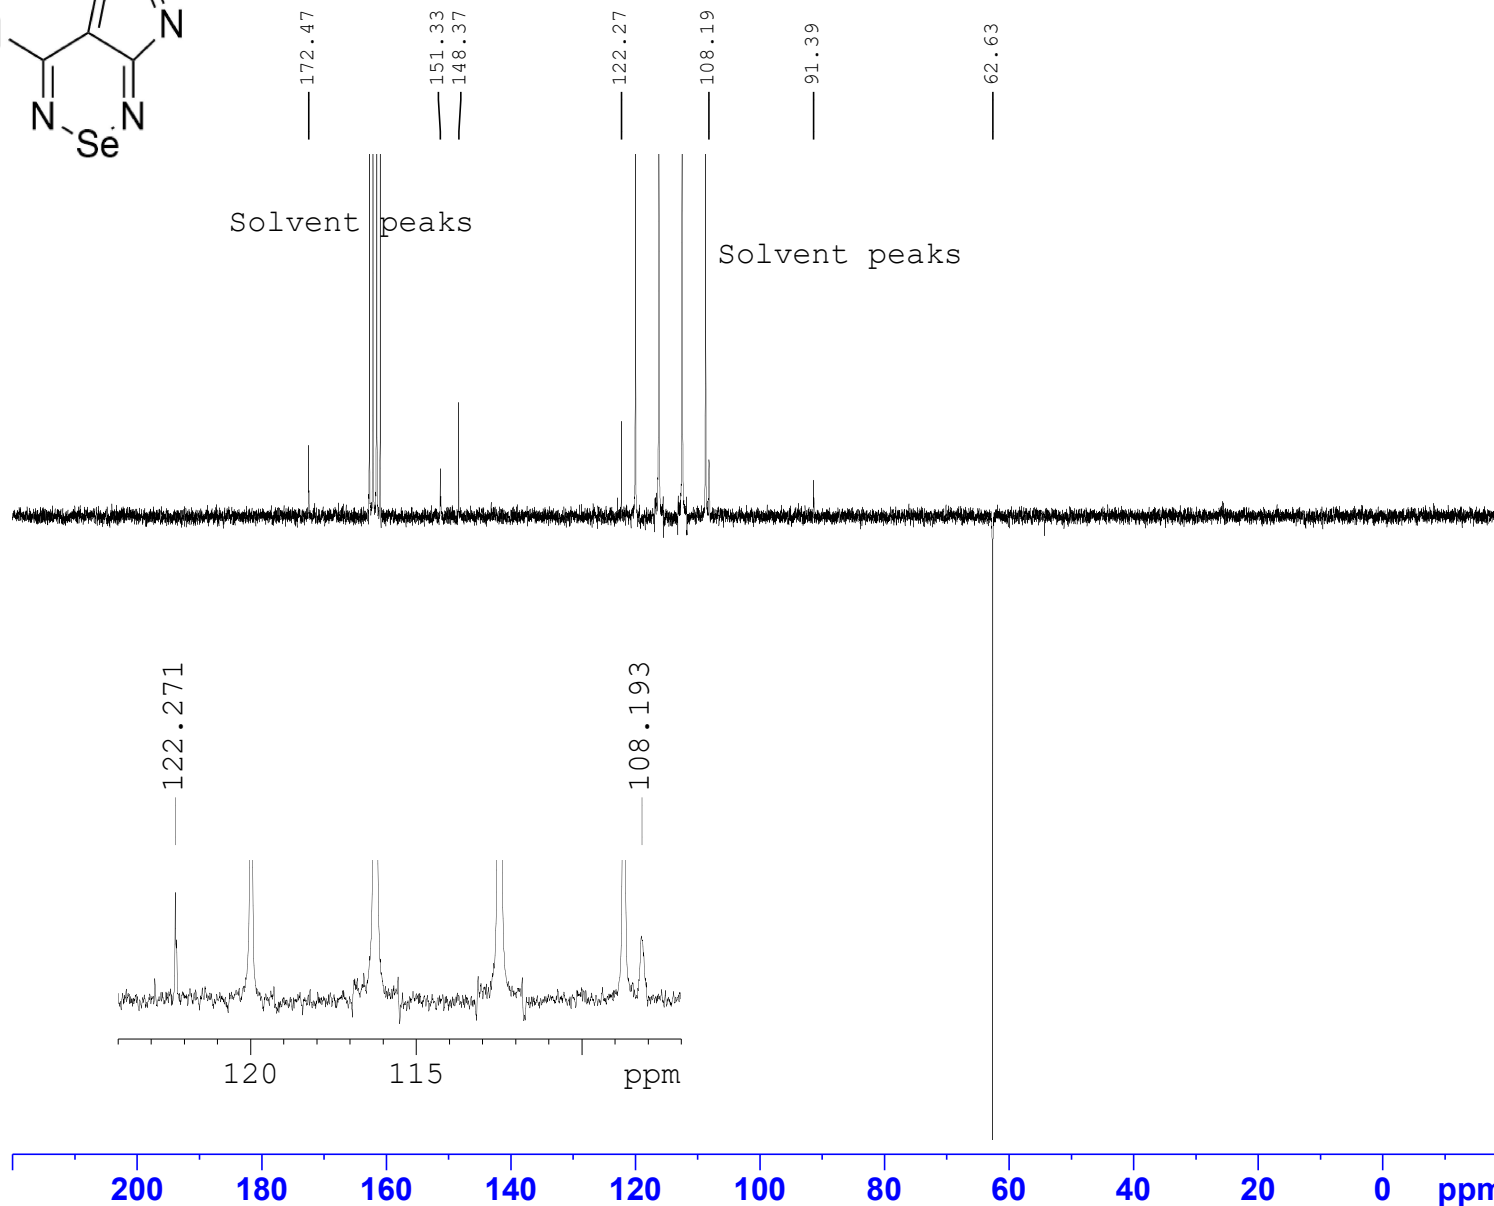

4-Chloro-6-phenoxy pyrrolo[2,3-c][1,2,6]selenadiazine-5-carbonitrile 15

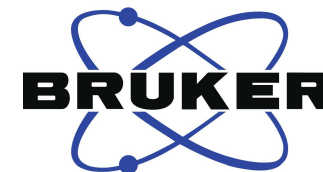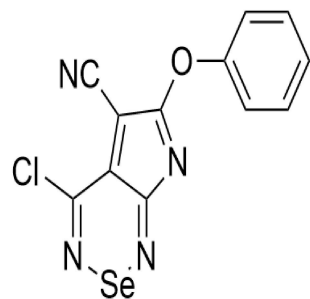

7.517  
7.510  
7.494  
7.489  
7.466  
7.465  
7.460  
7.449  
7.443  
7.435  
7.423  
7.419  
7.414  
7.374  
7.369  
7.364  
7.349  
7.346  
7.339  
7.328  
7.323  
7.318  
7.260

Solvent peak

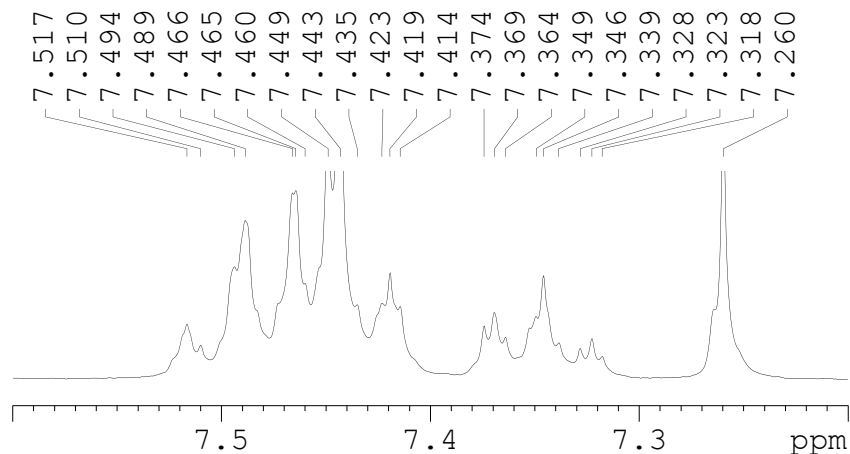

DCE

H2O c-hex

Current Data Parameters  
NAME NMR 300  
EXPNO 240  
PROCNO 1

F2 - Acquisition Parameters  
Date\_ 20230725  
Time\_ 19.09 h  
INSTRUM spect  
PROBHD z104275\_0375 (  
PULPROG zg30  
TD 65536  
SOLVENT CDCl3  
NS 16  
DS 2  
SWH 6009.615 Hz  
FIDRES 0.183399 Hz  
AQ 5.4525952 sec  
RG 201.81  
DW 83.200 usec  
DE 13.19 usec  
TE 300.9 K  
D1 1.00000000 sec  
TD0 1  
SFO1 300.1318533 MHz  
NUC1 1H  
P0 4.67 usec  
P1 14.00 usec  
PLW1 7.09999990 W

F2 - Processing parameters  
SI 65536  
SF 300.1300073 MHz  
WDW EM  
SSB 0  
LB 0.30 Hz  
GB 0  
PC 1.00

11 10 9 8 7 6 5 4 3 2 1 0 ppm

4.03  
1.00

4-Chloro-6-phenoxy pyrrolo[2,3-c][1,2,6]selenadiazine-5-carbonitrile 15

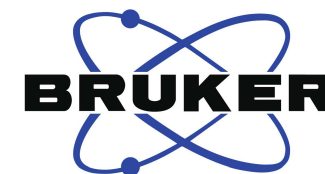

Current Data Parameters  
 NAME NMR 300  
 EXPNO 240  
 PROCNO 1

F2 - Acquisition Parameters  
 Date\_ 20230725  
 Time\_ 19.09 h  
 INSTRUM spect  
 PROBHD z104275\_0375 ( )  
 PULPROG zg30  
 TD 65536  
 SOLVENT CDCl3  
 NS 16  
 DS 2  
 SWH 6009.615 Hz  
 FIDRES 0.183399 Hz  
 AQ 5.4525952 sec  
 RG 201.81  
 DW 83.200 usec  
 DE 13.19 usec  
 TE 300.9 K  
 D1 1.00000000 sec  
 TD0 1  
 SFO1 300.1318533 MHz  
 NUC1 1H  
 P0 4.67 usec  
 P1 14.00 usec  
 PLW1 7.09999990 W

F2 - Processing parameters  
 SI 65536  
 SF 300.1300073 MHz  
 WDW EM  
 SSB 0  
 LB 0.30 Hz  
 GB 0  
 PC 1.00

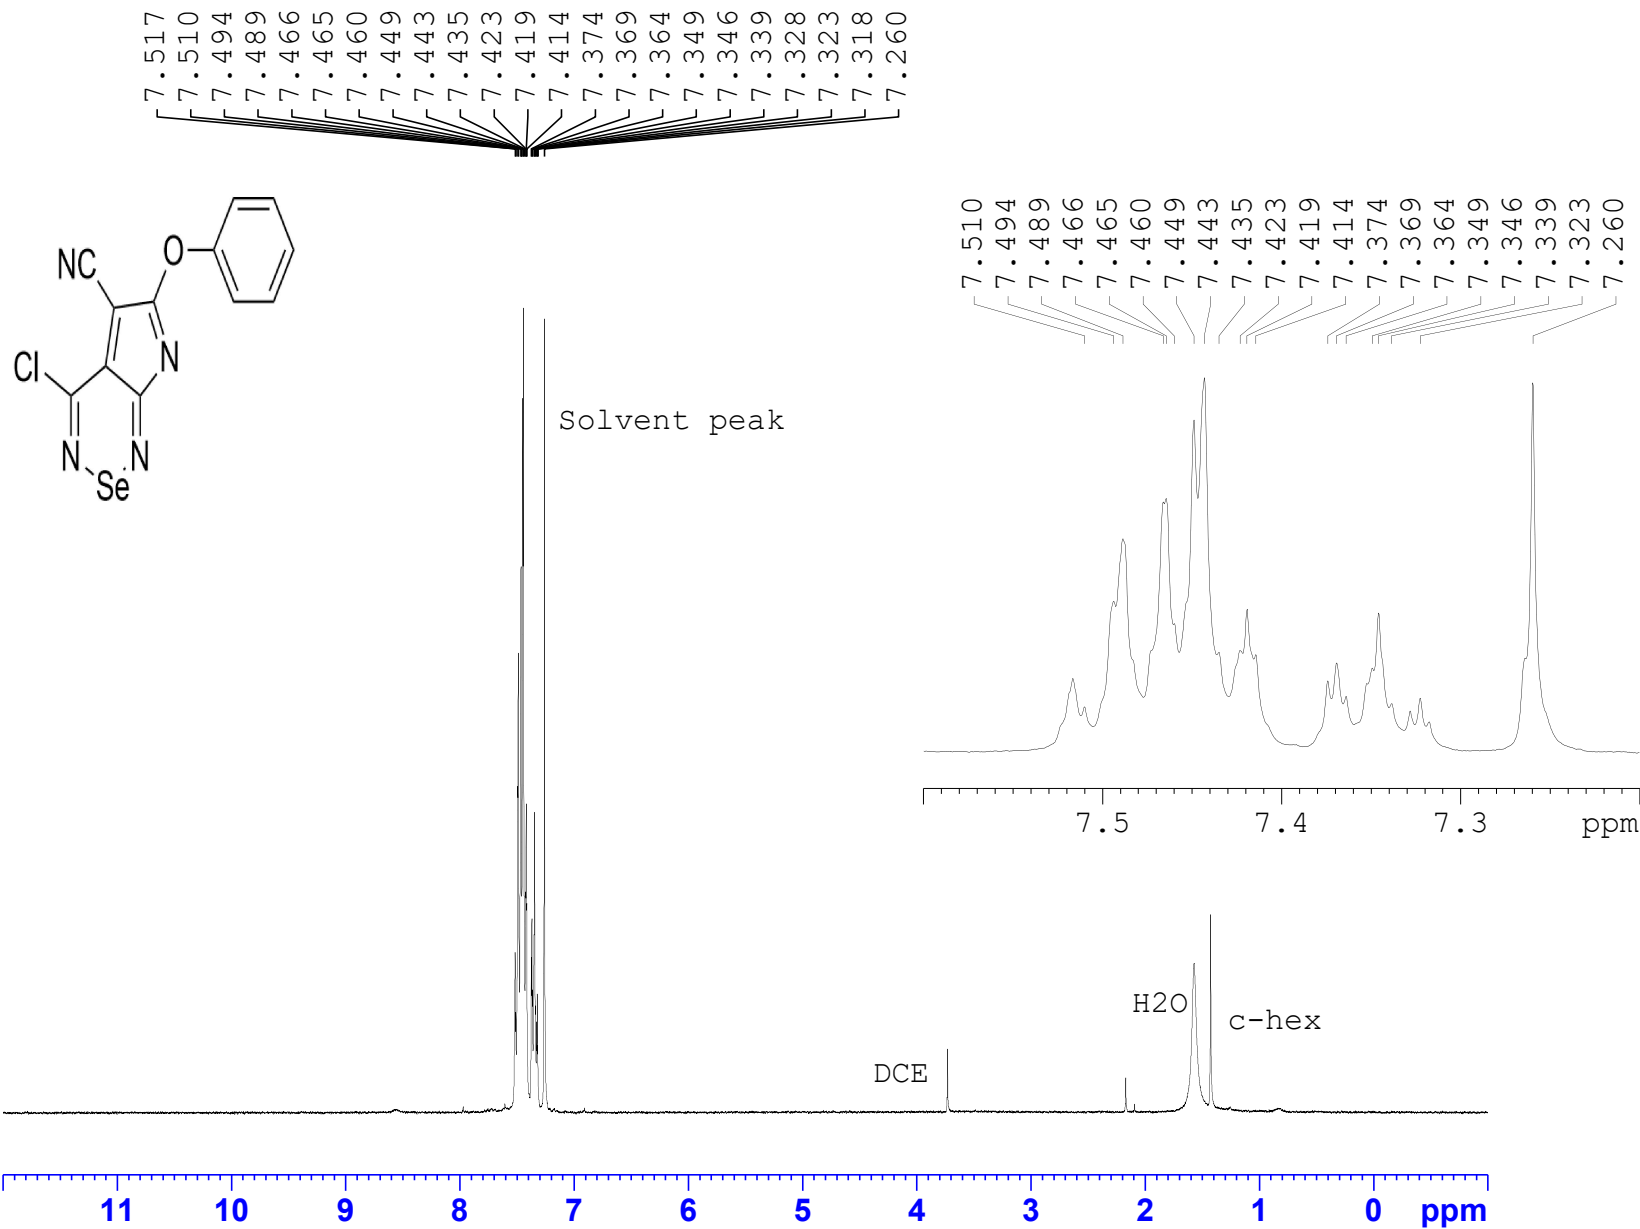



6-Amino-4-chloropyrrolo[2,3-c][1,2,6]selenadiazine-5-carbonitrile 16

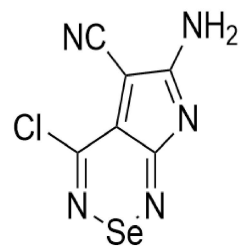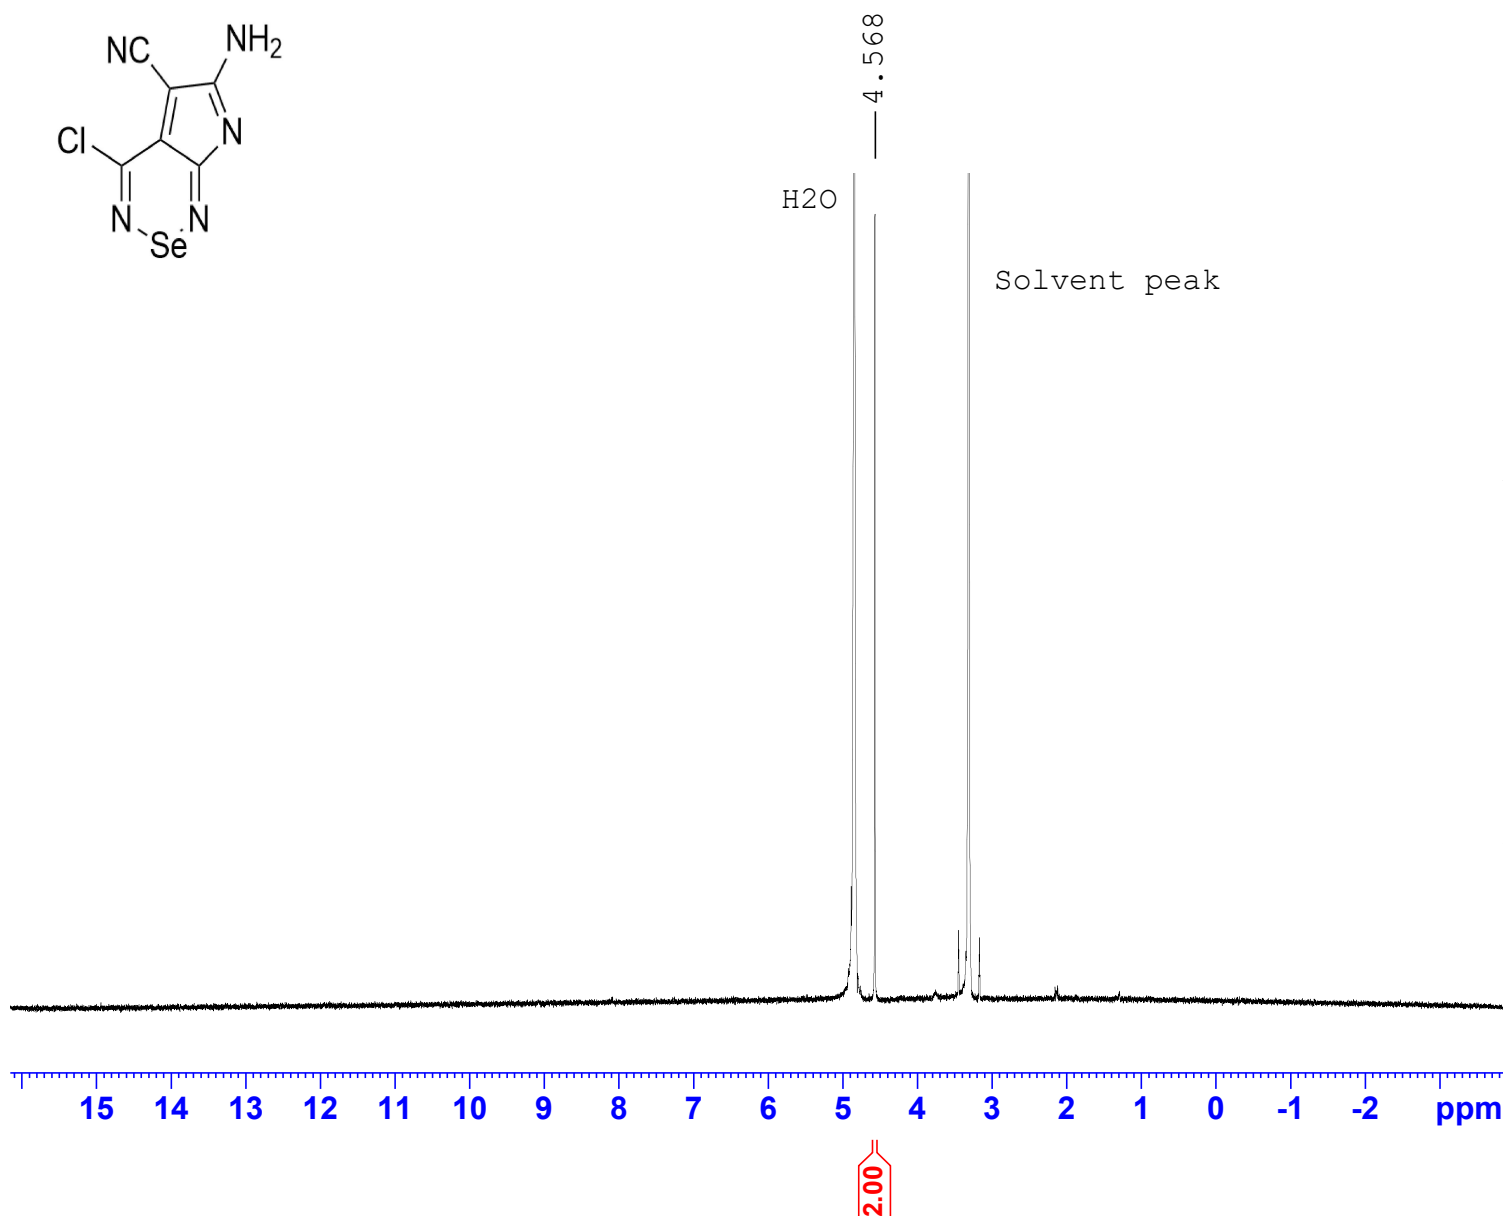

Current Data Parameters  
NAME nmr 500  
EXPNO 108  
PROCNO 1

F2 - Acquisition Parameters  
Date\_ 20230728  
Time\_ 16.05 h  
INSTRUM spect  
PROBHD z113652\_0078 (  
PULPROG zg30  
TD 65536  
SOLVENT MeOD  
NS 16  
DS 2  
SWH 10000.000 Hz  
FIDRES 0.305176 Hz  
AQ 3.2767999 sec  
RG 181  
DW 50.000 usec  
DE 13.55 usec  
TE 300.2 K  
D1 1.00000000 sec  
TD0 1  
SFO1 500.0360877 MHz  
NUC1 1H  
P0 4.00 usec  
P1 12.00 usec  
PLW1 16.34900093 W

F2 - Processing parameters  
SI 65536  
SF 500.0330100 MHz  
WDW EM  
SSB 0  
LB 0.30 Hz  
GB 0  
PC 1.00

6-Amino-4-chloropyrrolo[2,3-c][1,2,6]selenadiazine-5-carbonitrile 16

D2O wash in MeOD

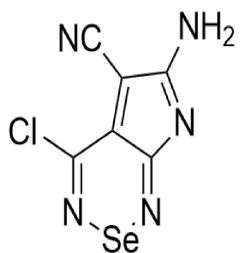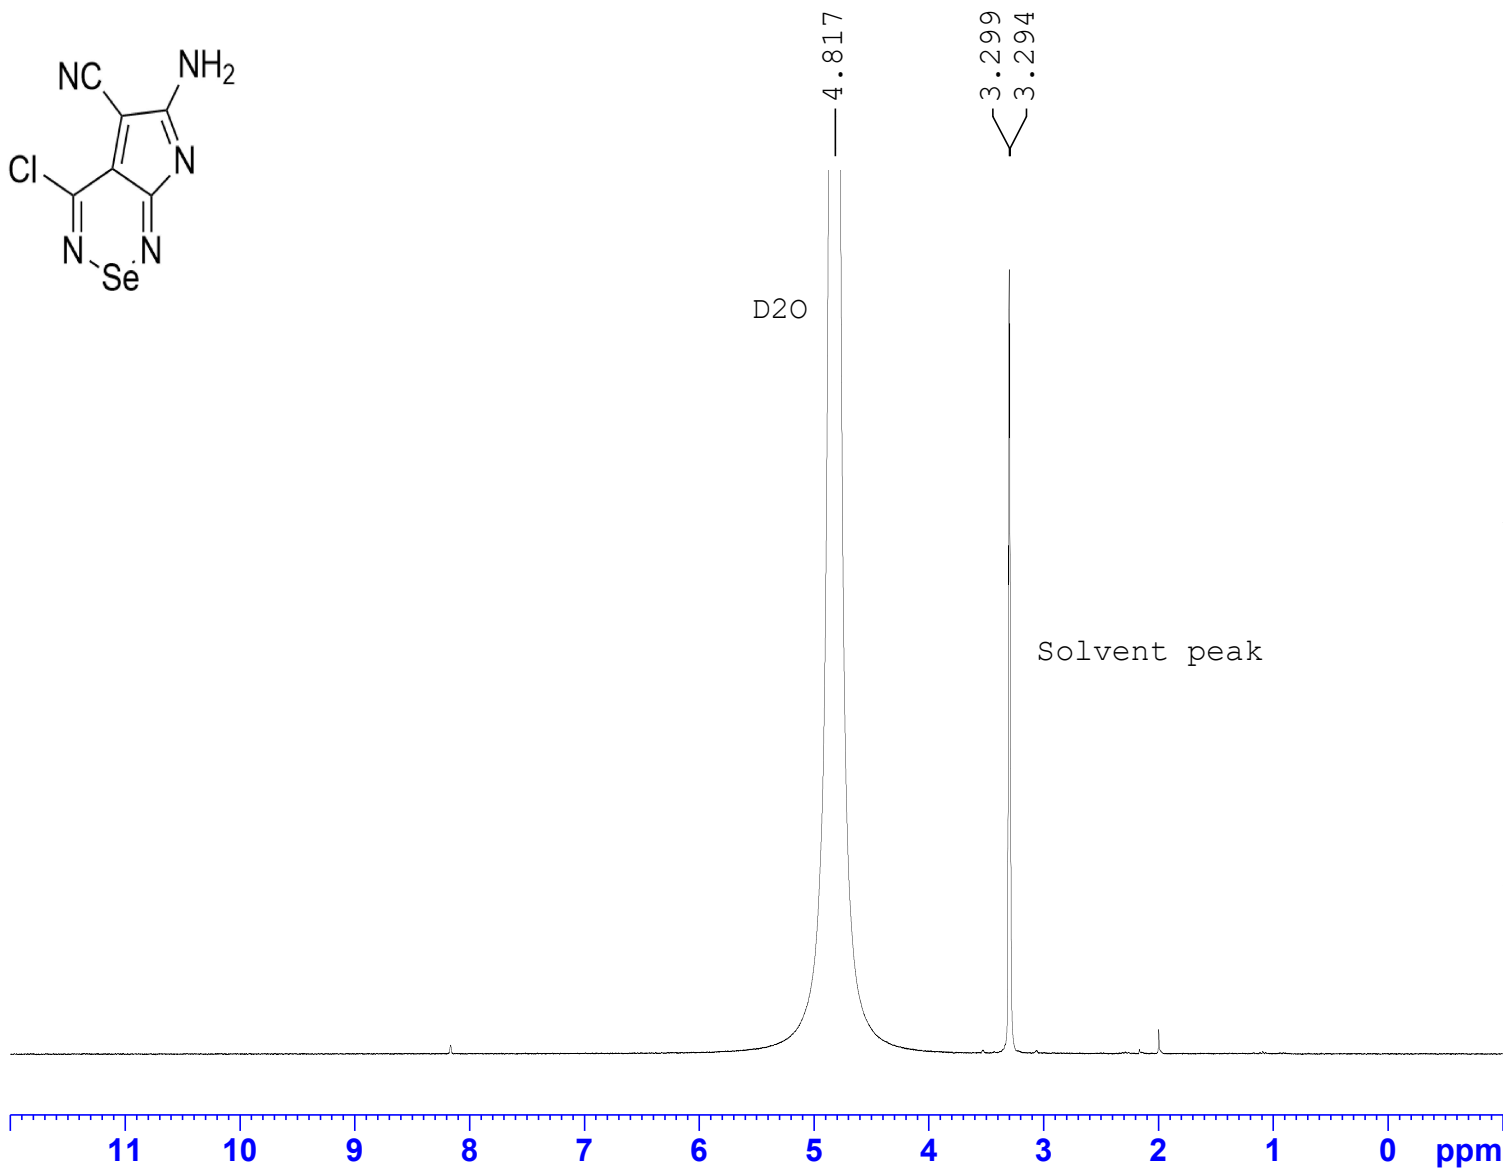

Current Data Parameters  
NAME NMR 300  
EXPNO 265  
PROCNO 1

F2 - Acquisition Parameters  
Date\_ 20230814  
Time\_ 14.08 h  
INSTRUM spect  
PROBHD z104275\_0375 (  
PULPROG zg30  
TD 65536  
SOLVENT MeOD  
NS 16  
DS 2  
SWH 6009.615 Hz  
FIDRES 0.183399 Hz  
AQ 5.4525952 sec  
RG 113.88  
DW 83.200 usec  
DE 13.19 usec  
TE 296.9 K  
D1 1.00000000 sec  
TD0 1  
SFO1 300.1318533 MHz  
NUC1 1H  
P0 4.67 usec  
P1 14.00 usec  
PLW1 7.09999990 W

F2 - Processing parameters  
SI 65536  
SF 300.1300089 MHz  
WDW EM  
SSB 0  
LB 0.30 Hz  
GB 0  
PC 1.00

6-Amino-4-chloropyrrolo[2,3-c][1,2,6]selenadiazine-5-carbonitrile 16

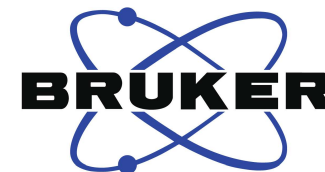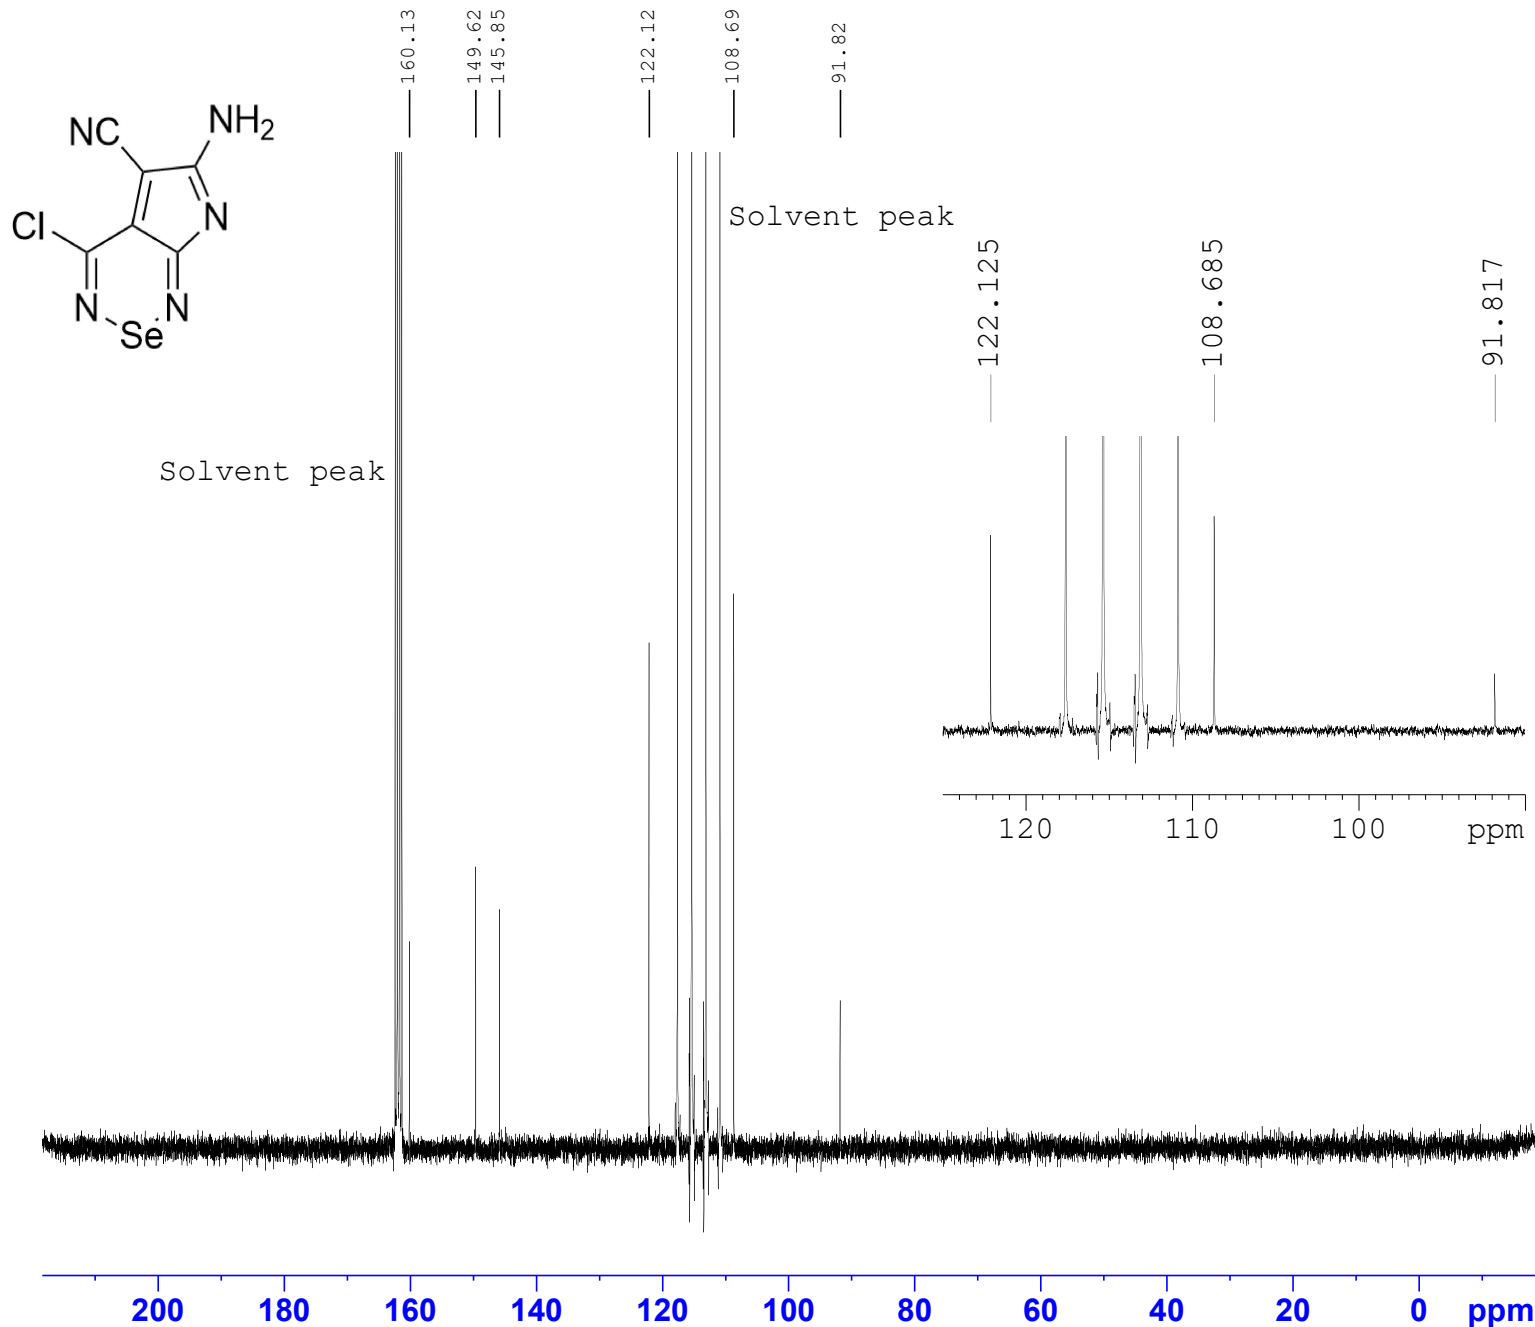

Current Data Parameters  
 NAME nmr 500  
 EXPNO 90  
 PROCNO 1

F2 - Acquisition Parameters  
 Date\_ 20230621  
 Time 8.25 h  
 INSTRUM spect  
 PROBHD z113652\_0078 (  
 PULPROG jmod  
 TD 65536  
 SOLVENT TFA2  
 NS 13312  
 DS 4  
 SWH 29761.904 Hz  
 FIDRES 0.908261 Hz  
 AQ 1.1010048 sec  
 RG 2050  
 DW 16.800 usec  
 DE 6.50 usec  
 TE 300.0 K  
 CNST2 145.000000  
 CNST11 1.000000  
 D1 2.0000000 sec  
 D20 0.00689655 sec  
 TD0 1  
 SFO1 125.7459712 MHz  
 NUC1 13C  
 P1 10.00 usec  
 P2 20.00 usec  
 PLW1 121.3600061 W  
 SFO2 500.0350001 MHz  
 NUC2 1H  
 CPDPRG[2] waltz65  
 PCPD2 80.00 usec  
 PLW2 16.34900093 W  
 PLW12 0.34647381 W

F2 - Processing parameters  
 SI 32768  
 SF 125.7333979 MHz  
 WDW EM  
 SSB 0  
 LB 1.00 Hz  
 GB 0  
 PC 1.40

4-Chloro-6-(methylamino)pyrrolo[2,3-c][1,2,6]selenadiazine-5-carbonitrile 17

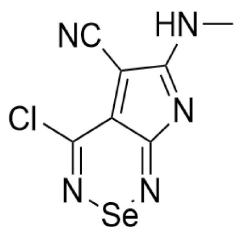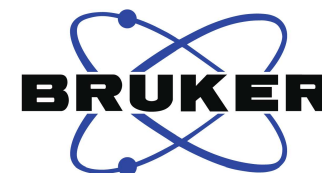

Current Data Parameters  
 NAME nmr 500  
 EXPNO 137  
 PROCNO 1

F2 - Acquisition Parameters  
 Date\_ 20230807  
 Time\_ 14.30 h  
 INSTRUM spect  
 PROBHD z113652\_0078 (  
 PULPROG zg30  
 TD 65536  
 SOLVENT DMSO  
 NS 16  
 DS 2  
 SWH 10000.000 Hz  
 FIDRES 0.305176 Hz  
 AQ 3.2767999 sec  
 RG 203  
 DW 50.000 usec  
 DE 13.55 usec  
 TE 299.2 K  
 D1 1.00000000 sec  
 TD0 1  
 SFO1 500.0360877 MHz  
 NUC1 1H  
 P0 4.00 usec  
 P1 12.00 usec  
 PLW1 16.34900093 W

F2 - Processing parameters  
 SI 65536  
 SF 500.0330043 MHz  
 WDW EM  
 SSB 0  
 LB 0.30 Hz  
 GB 0  
 PC 1.00

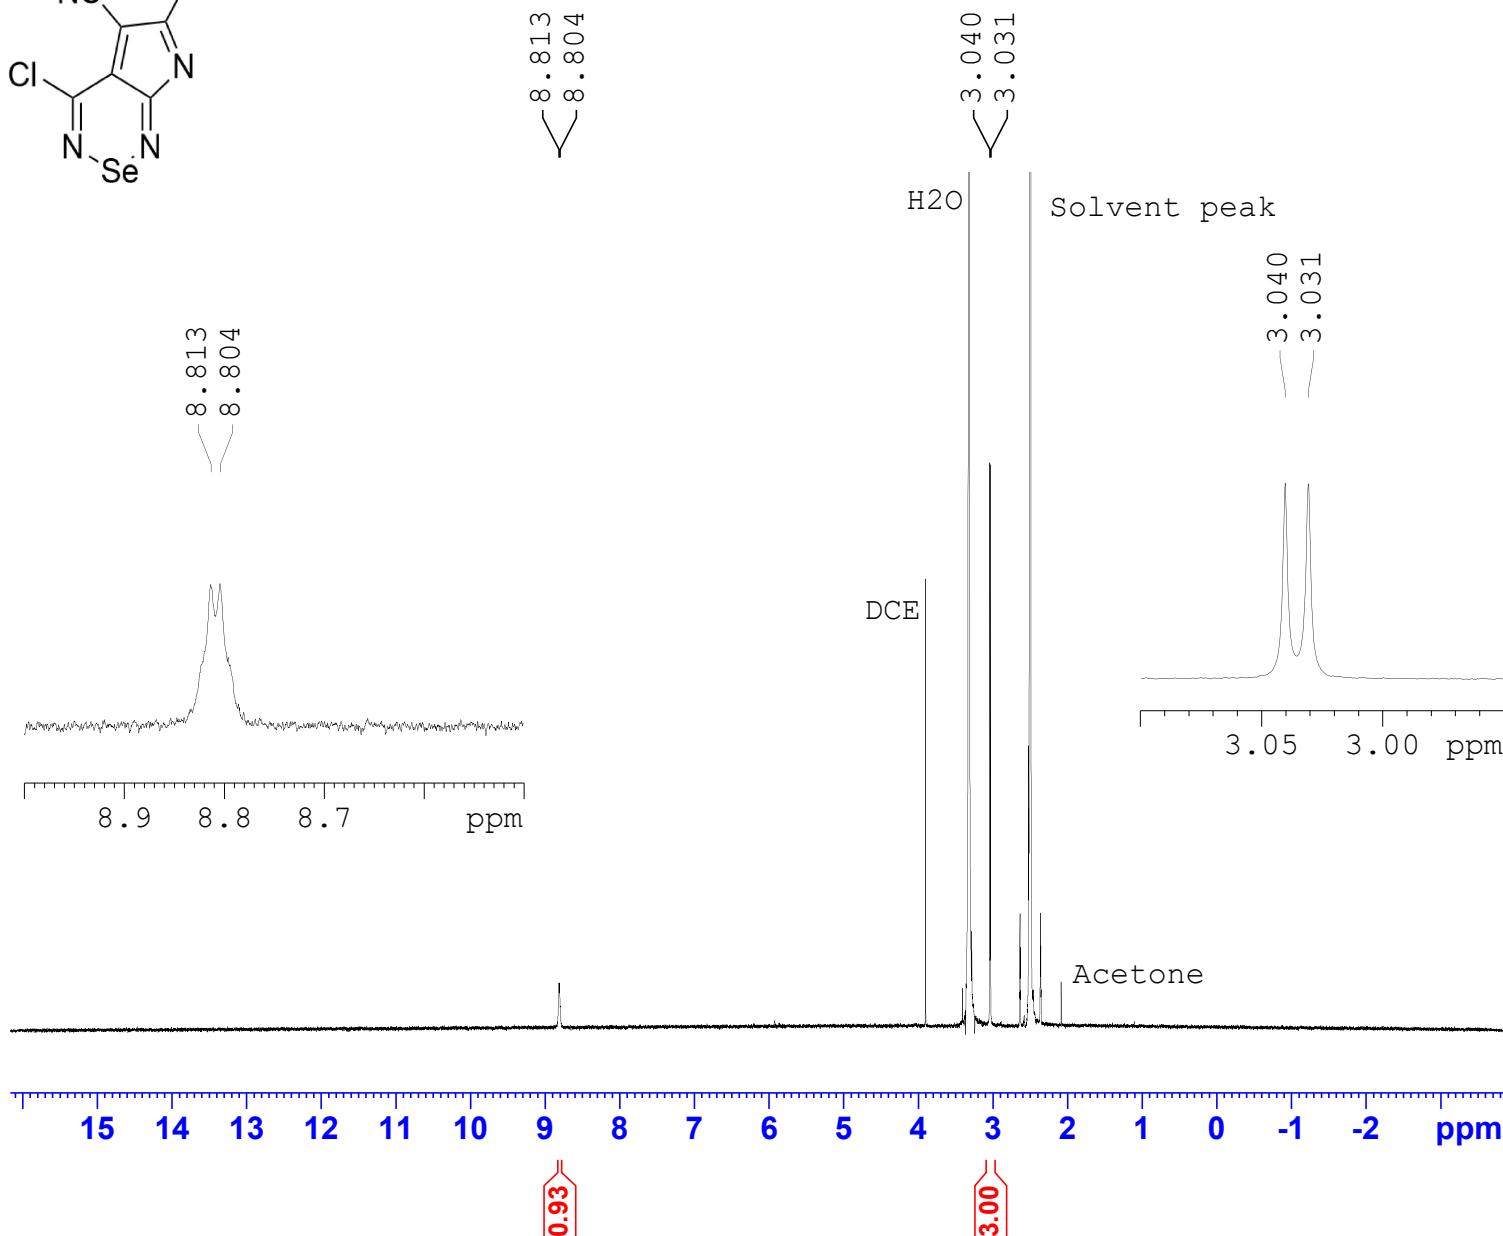

4-Chloro-6-(methylamino)pyrrolo[2,3-c][1,2,6]selenadiazine-5-carbonitrile 17

D2O wash in DMSO-d6

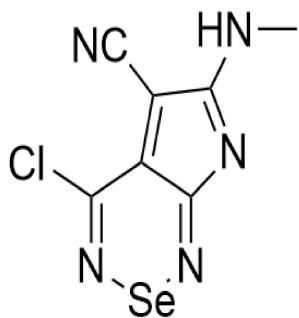

8.344

2.569

2.050

HOD

Solvent peak

Unknown impurity  
from D2O

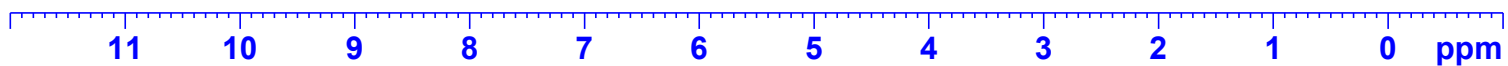

0.25

3.00



Current Data Parameters  
NAME nmr 500  
EXPNO 138  
PROCNO 1

F2 - Acquisition Parameters  
Date\_ 20230807  
Time\_ 14.43 h  
INSTRUM spect  
PROBHD z113652\_0078 (  
PULPROG zg30  
TD 65536  
SOLVENT DMSO  
NS 16  
DS 2  
SWH 10000.000 Hz  
FIDRES 0.305176 Hz  
AQ 3.2767999 sec  
RG 64  
DW 50.000 usec  
DE 13.55 usec  
TE 299.2 K  
D1 1.00000000 sec  
TD0 1  
SFO1 500.0360877 MHz  
NUC1 1H  
P0 4.00 usec  
P1 12.00 usec  
PLW1 16.34900093 W

F2 - Processing parameters  
SI 65536  
SF 500.0332294 MHz  
WDW EM  
SSB 0  
LB 0.30 Hz  
GB 0  
PC 1.00

4-Chloro-6-(methylamino)pyrrolo[2,3-c][1,2,6]selenadiazine-5-carbonitrile 17

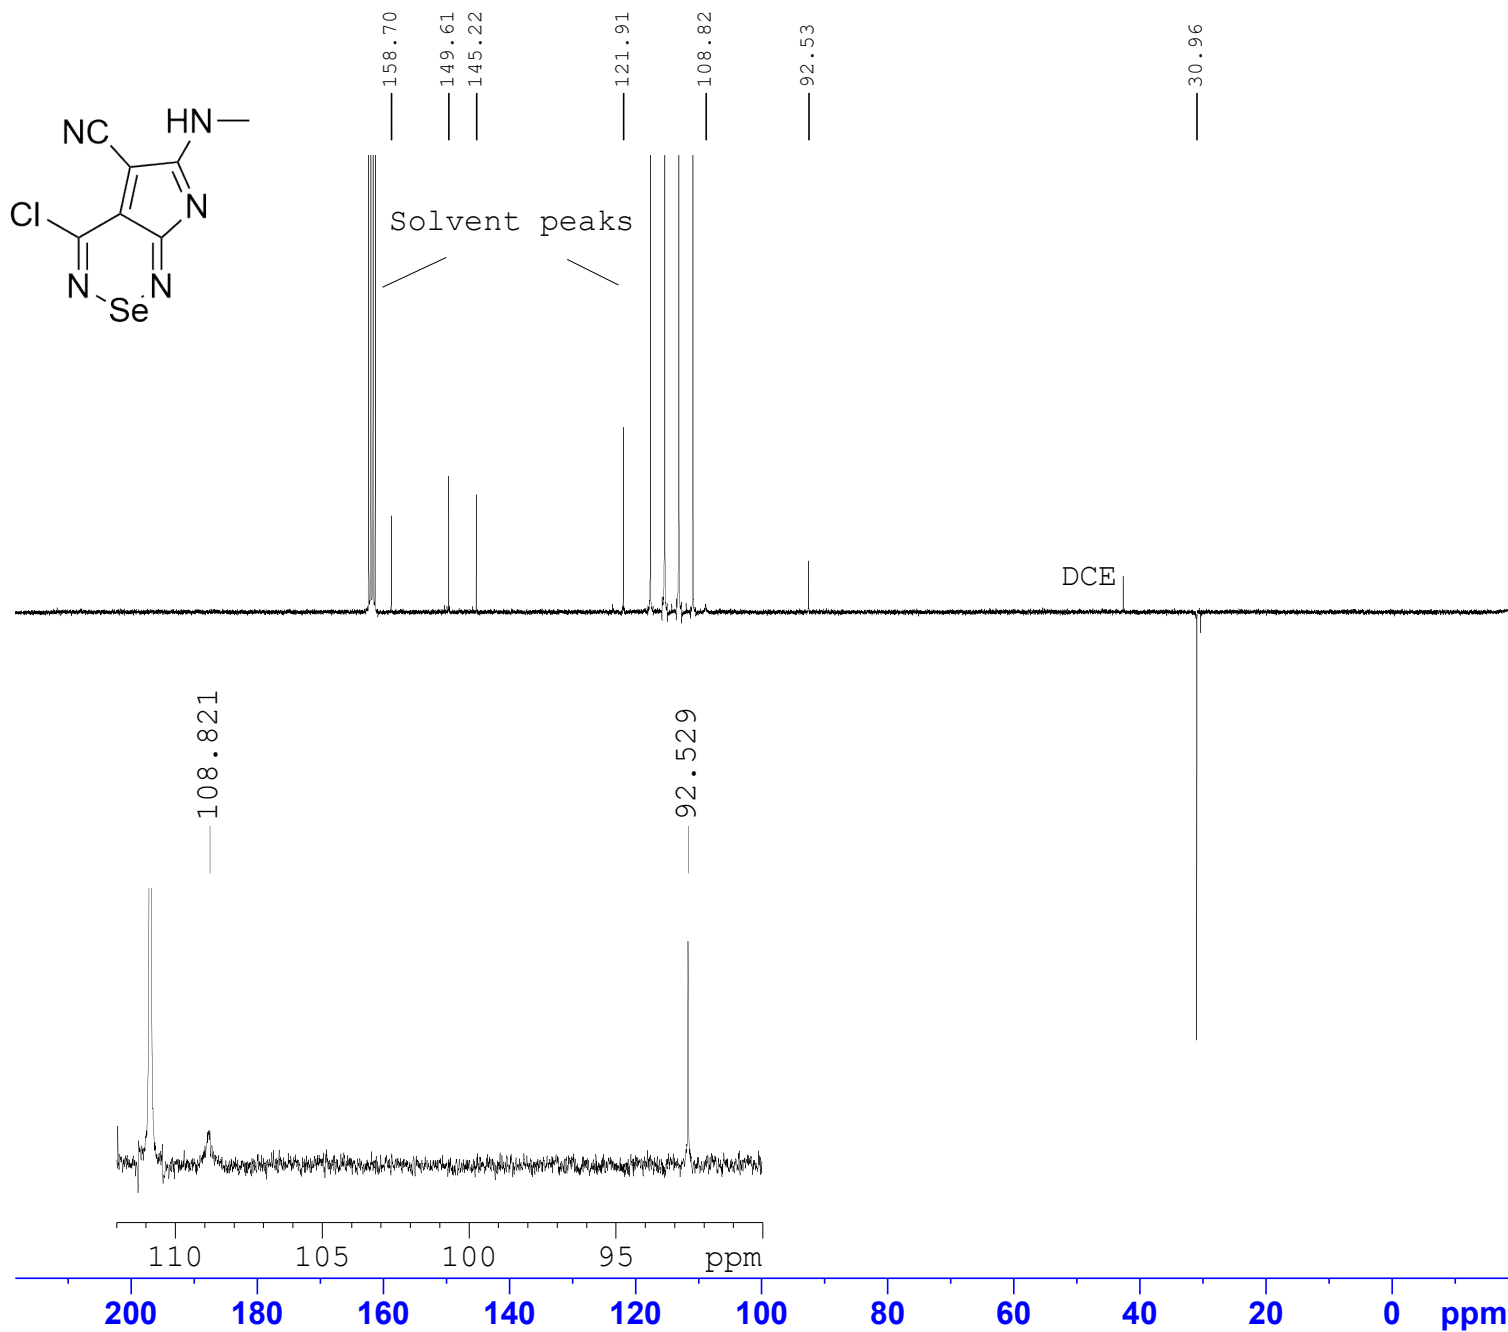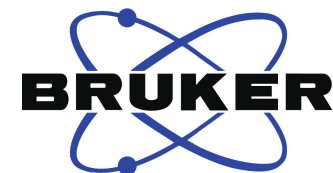

Current Data Parameters  
 NAME nmr 500  
 EXPNO 73  
 PROCNO 1

F2 - Acquisition Parameters  
 Date\_ 20230517  
 Time\_ 7.43 h  
 INSTRUM spect  
 PROBHD z113652\_0078 (  
 PULPROG jmod  
 TD 65536  
 SOLVENT TFA2  
 NS 13312  
 DS 4  
 SWH 29761.904 Hz  
 FIDRES 0.908261 Hz  
 AQ 1.1010048 sec  
 RG 2050  
 DW 16.800 usec  
 DE 6.50 usec  
 TE 299.8 K  
 CNST2 145.000000  
 CNST11 1.0000000  
 D1 2.0000000 sec  
 D20 0.00689655 sec  
 TD0 1  
 SFO1 125.7459712 MHz  
 NUC1 13C  
 P1 10.00 usec  
 P2 20.00 usec  
 PLW1 121.36000061 W  
 SFO2 500.0350001 MHz  
 NUC2 1H  
 CPDPRG[2] waltz65  
 PCPD2 80.00 usec  
 PLW2 16.34900093 W  
 PLW12 0.34647381 W

F2 - Processing parameters  
 SI 32768  
 SF 125.7333979 MHz  
 WDW EM  
 SSB 0  
 LB 1.00 Hz  
 GB 0  
 PC 1.40

6-(Benzylamino)-4-chloropyrrolo[2,3-c][1,2,6]selenadiazine-5-carbonitrile 18

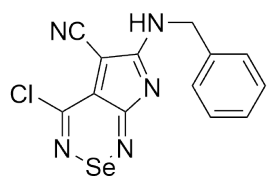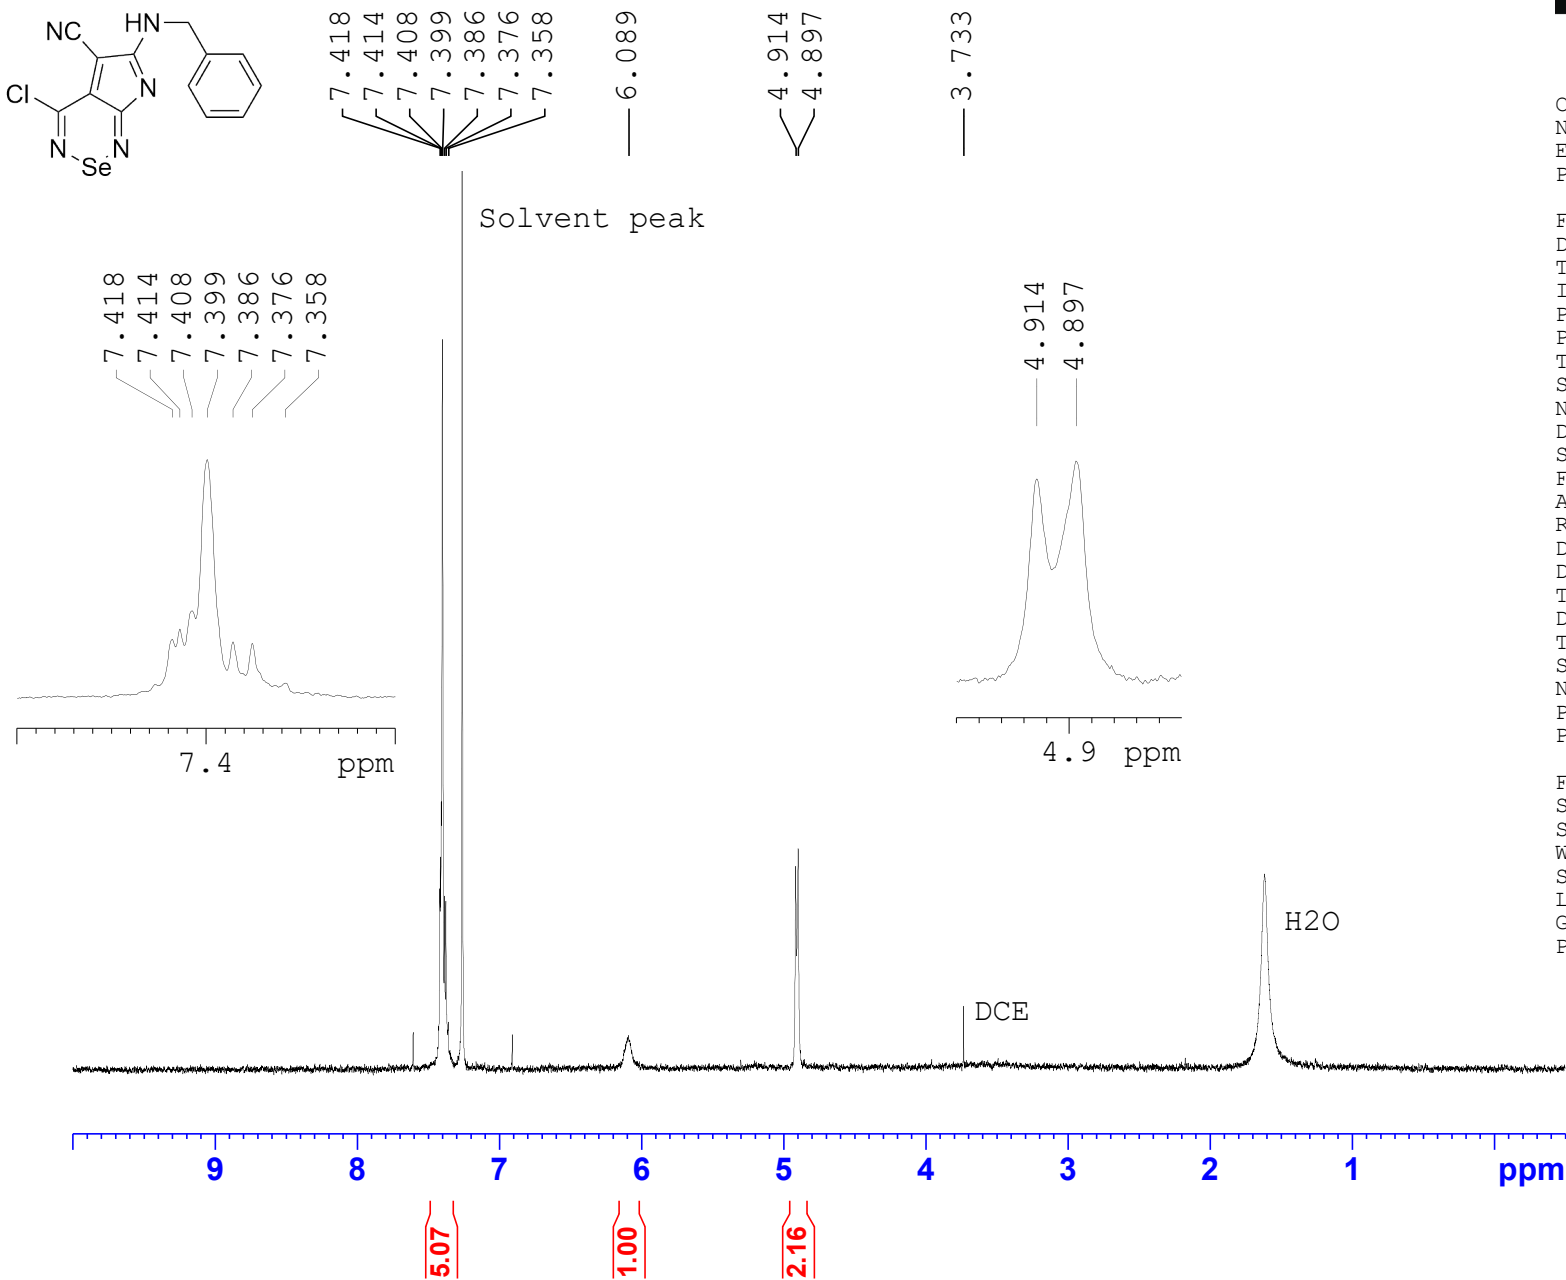

Current Data Parameters  
 NAME NMR 300  
 EXPNO 170  
 PROCNO 1

F2 - Acquisition Parameters  
 Date\_ 20230206  
 Time\_ 17.04 h  
 INSTRUM spect  
 PROBHD Z104275\_0375 (  
 PULPROG zg30  
 TD 65536  
 SOLVENT CDCl3  
 NS 16  
 DS 2  
 SWH 6009.615 Hz  
 FIDRES 0.183399 Hz  
 AQ 5.4525952 sec  
 RG 201.81  
 DW 83.200 usec  
 DE 6.50 usec  
 TE 294.4 K  
 D1 1.00000000 sec  
 TD0 1  
 SFO1 300.1318533 MHz  
 NUC1 1H  
 P1 14.00 usec  
 PLW1 7.85570002 W

F2 - Processing parameters  
 SI 65536  
 SF 300.1300074 MHz  
 WDW EM  
 SSB 0  
 LB 0.30 Hz  
 GB 0  
 PC 1.00

6-(Benzylamino)-4-chloropyrrolo[2,3-c][1,2,6]selenadiazine-5-carbonitrile 18

D2O wash in CDCl3

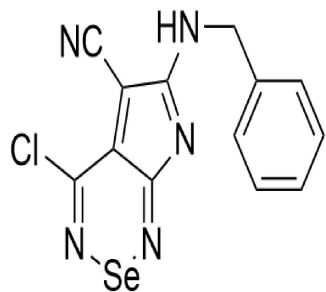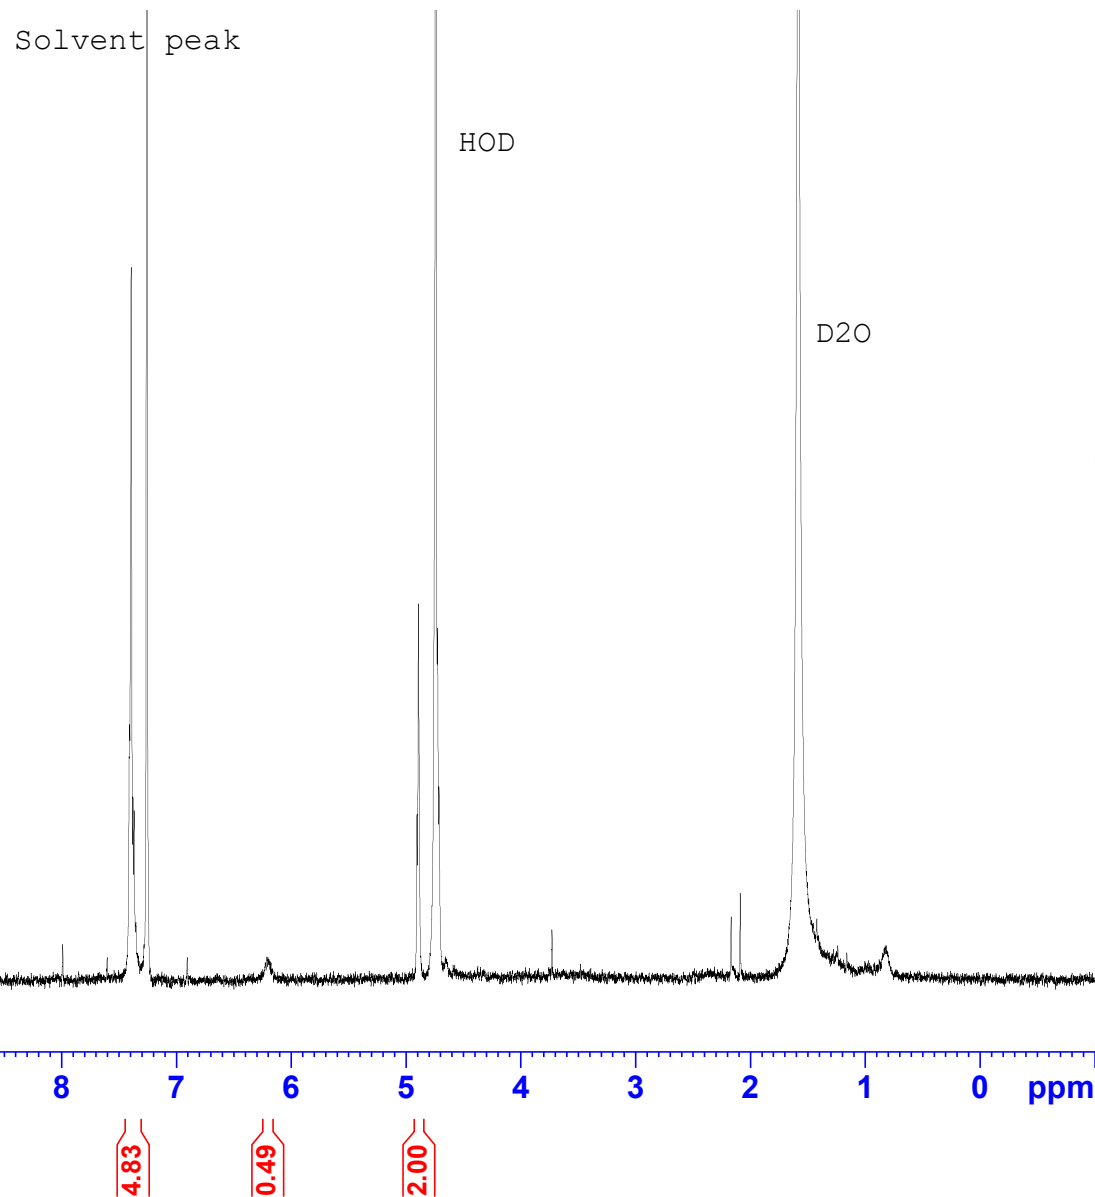

Current Data Parameters  
NAME NMR 300  
EXPNO 267  
PROCNO 1

F2 - Acquisition Parameters  
Date\_ 20230814  
Time\_ 14.47 h  
INSTRUM spect  
PROBHD z104275\_0375 (  
PULPROG zg30  
TD 65536  
SOLVENT CDCl3  
NS 16  
DS 2  
SWH 6009.615 Hz  
FIDRES 0.183399 Hz  
AQ 5.4525952 sec  
RG 201.81  
DW 83.200 usec  
DE 13.19 usec  
TE 296.9 K  
D1 1.00000000 sec  
TD0 1  
SFO1 300.1318533 MHz  
NUC1 1H  
P0 4.67 usec  
P1 14.00 usec  
PLW1 7.09999990 W

F2 - Processing parameters  
SI 65536  
SF 300.1300083 MHz  
WDW EM  
SSB 0  
LB 0.30 Hz  
GB 0  
PC 1.00



6-(Benzylamino)-4-chloropyrrolo[2,3-c][1,2,6]selenadiazine-5-carbonitrile 18

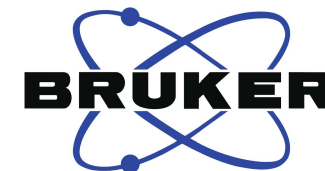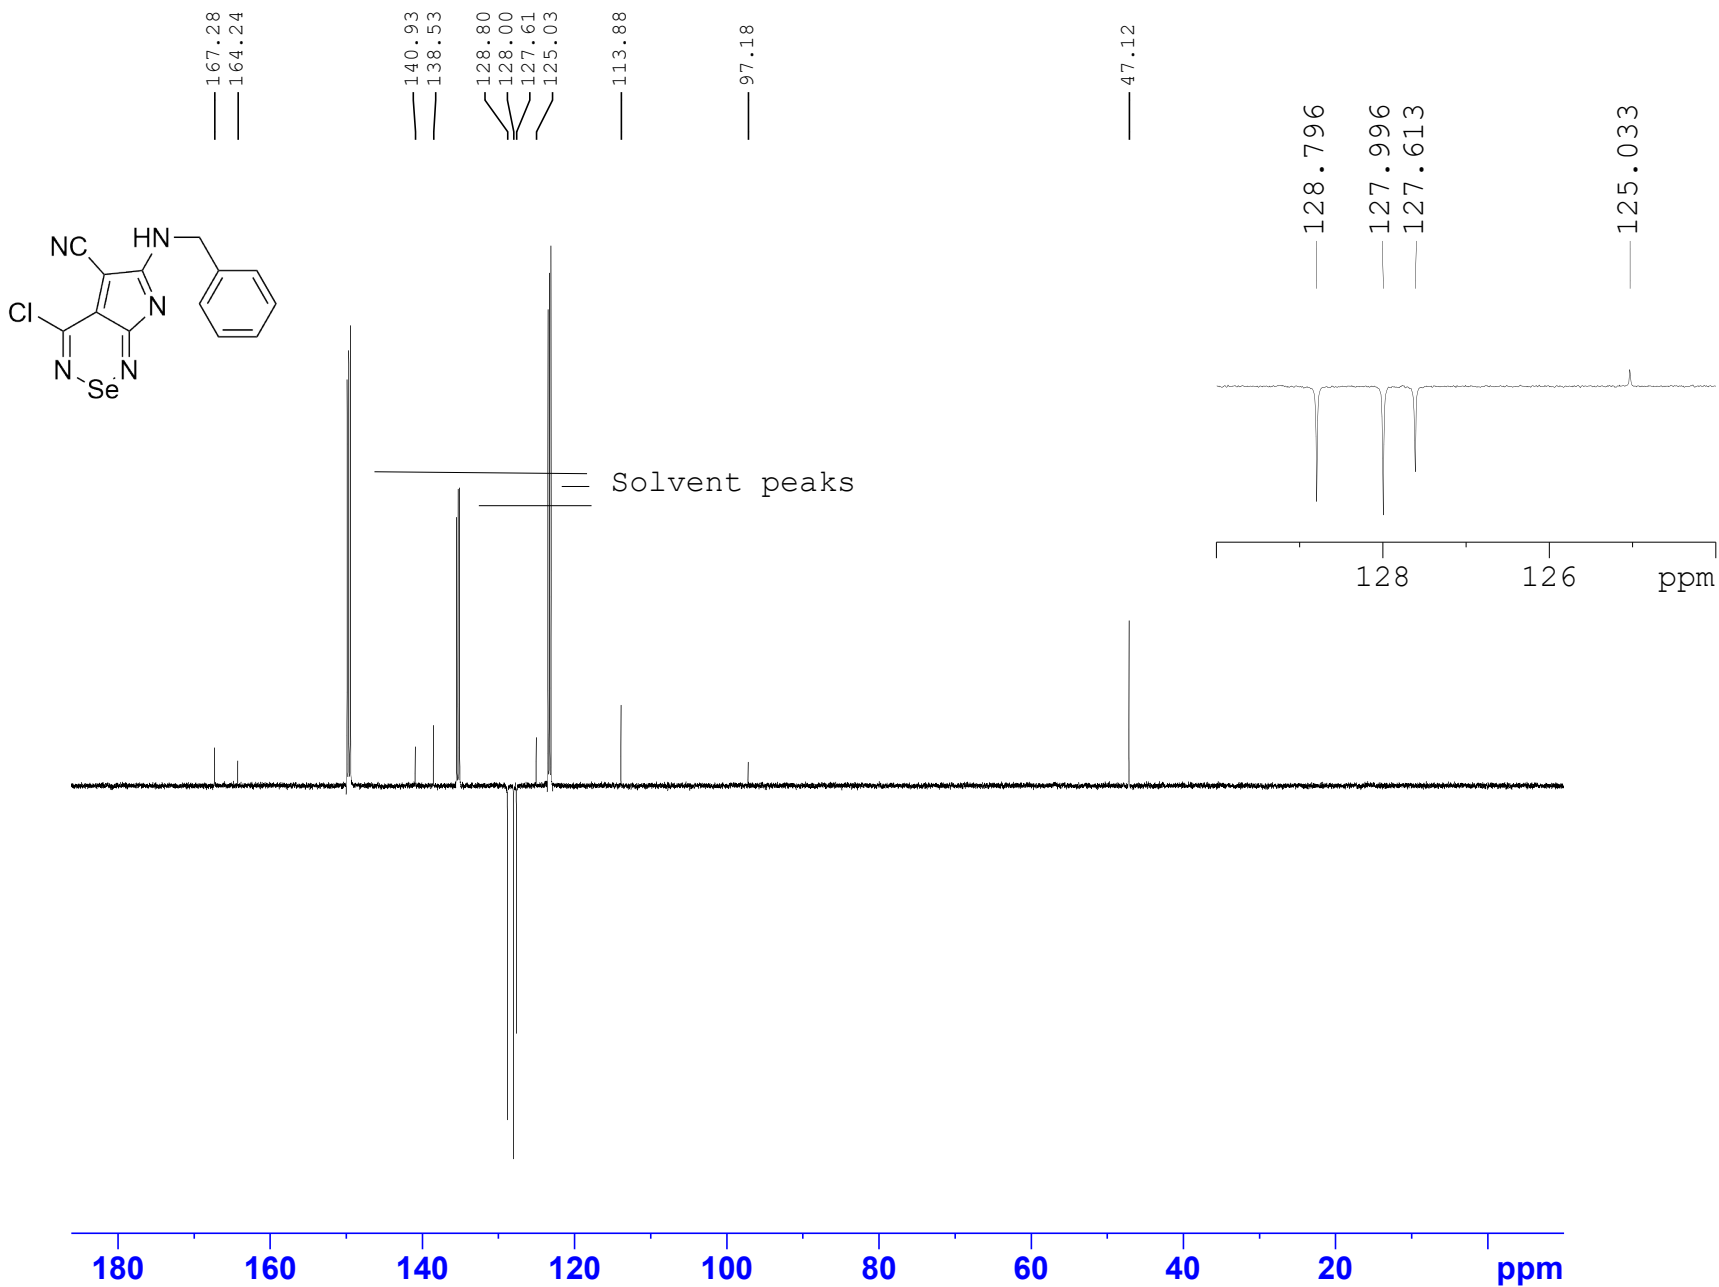

Current Data Parameters  
 NAME nmr 500  
 EXPNO 77  
 PROCNO 1

F2 - Acquisition Parameters  
 Date\_ 20230526  
 Time 15.17 h  
 INSTRUM spect  
 PROBHD z113652\_0078 (  
 PULPROG jmod  
 TD 65536  
 SOLVENT Pyr  
 NS 655  
 DS 4  
 SWH 29761.904 Hz  
 FIDRES 0.908261 Hz  
 AQ 1.1010048 sec  
 RG 2050  
 DW 16.800 usec  
 DE 6.50 usec  
 TE 297.7 K  
 CNST2 145.0000000  
 CNST11 1.0000000  
 D1 2.00000000 sec  
 D20 0.00689655 sec  
 TD0 1  
 SFO1 125.7459712 MHz  
 NUC1 13C  
 P1 10.00 usec  
 P2 20.00 usec  
 PLW1 121.36000061 W  
 SFO2 500.0350001 MHz  
 NUC2 1H  
 CPDPRG[2] waltz65  
 PCPD2 80.00 usec  
 PLW2 16.34900093 W  
 PLW12 0.34647381 W

F2 - Processing parameters  
 SI 32768  
 SF 125.7333979 MHz  
 WDW EM  
 SSB 0  
 LB 1.00 Hz  
 GB 0  
 PC 1.40

4-Chloro-6-(phenylamino)pyrrolo[2,3-c][1,2,6]selenadiazine-5-carbonitrile 19

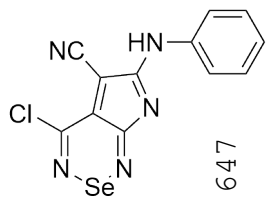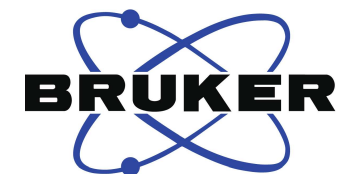

Current Data Parameters  
 NAME nmr 500  
 EXPNO 91  
 PROCNO 1

F2 - Acquisition Parameters

Date\_ 20230621  
 Time\_ 14.57 h  
 INSTRUM spect  
 PROBHD z113652\_0078 (  
 PULPROG zg30  
 TD 65536  
 SOLVENT Acetone  
 NS 16  
 DS 2  
 SWH 10000.000 Hz  
 FIDRES 0.305176 Hz  
 AQ 3.2767999 sec  
 RG 203  
 DW 50.000 usec  
 DE 13.55 usec  
 TE 298.6 K  
 D1 1.0000000 sec  
 TD0 1  
 SF01 500.0360877 MHz  
 NUC1 1H  
 P0 4.00 usec  
 P1 12.00 usec  
 PLW1 16.34900093 W

F2 - Processing parameters

SI 65536  
 SF 500.0330080 MHz  
 WDW EM  
 SSB 0  
 LB 0.30 Hz  
 GB 0  
 PC 1.00

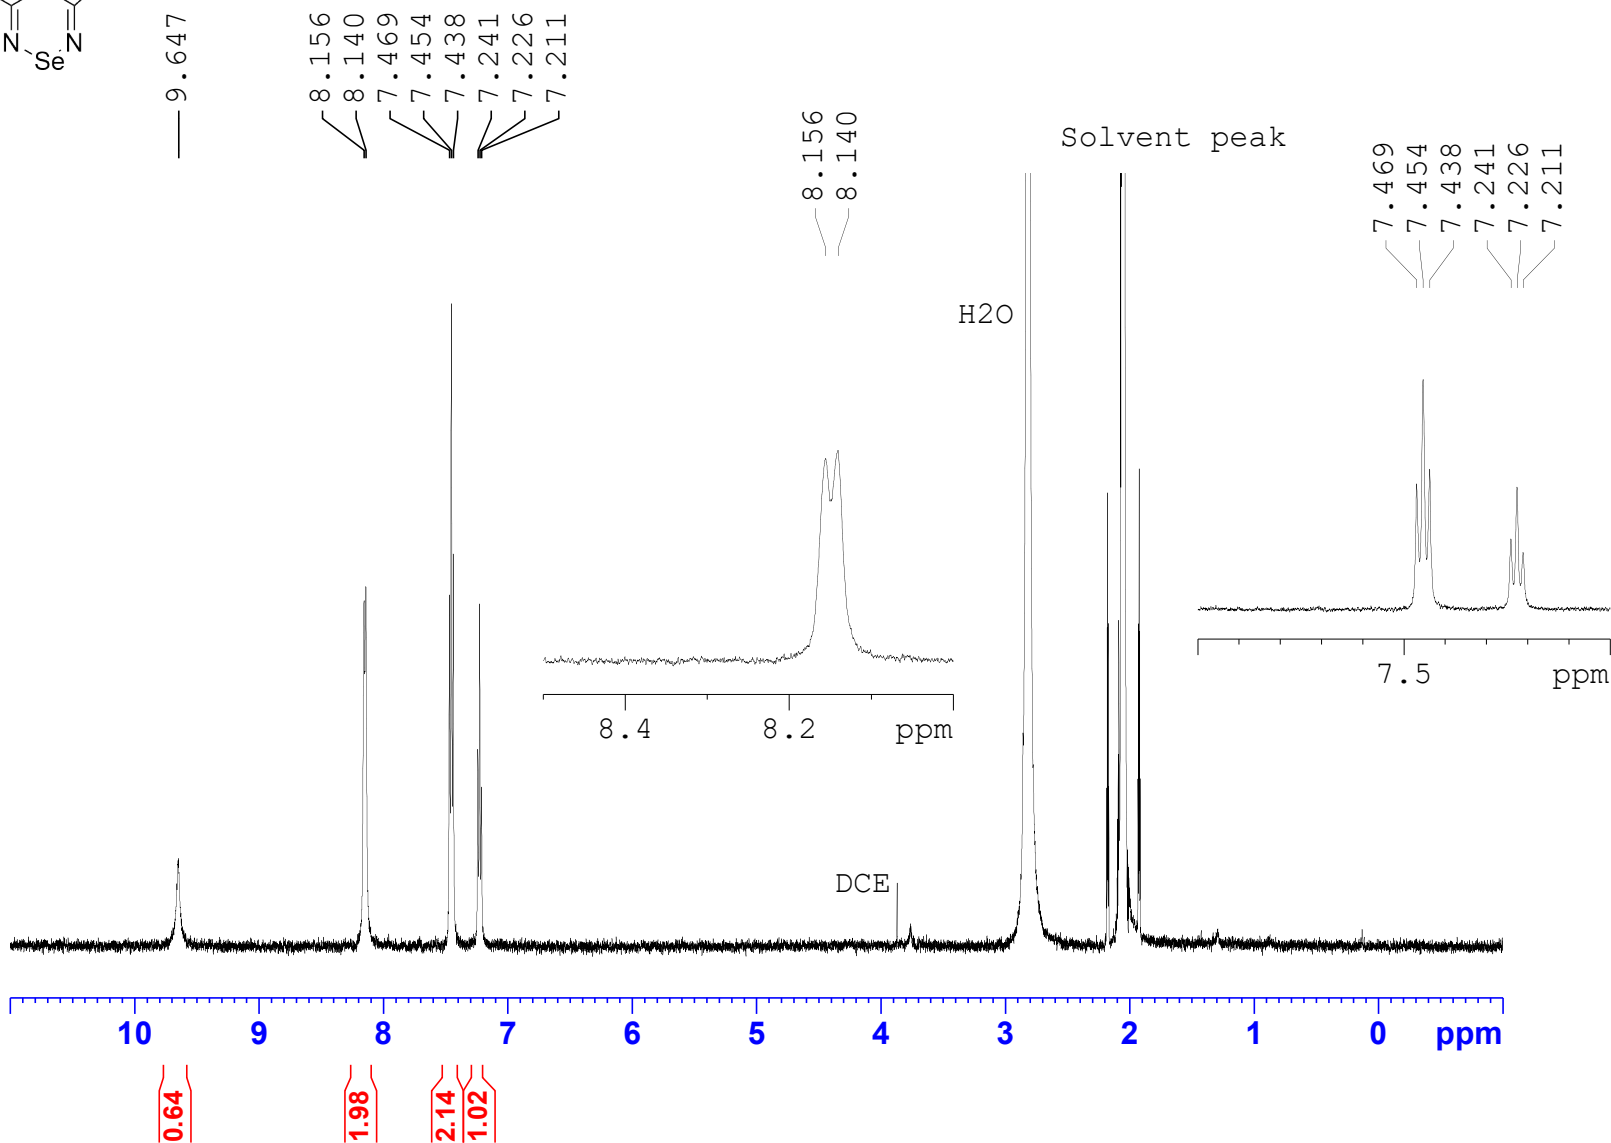

4-Chloro-6-(phenylamino)pyrrolo[2,3-c][1,2,6]selenadiazine-5-carbonitrile 19

D2O wash in Acetone-d6

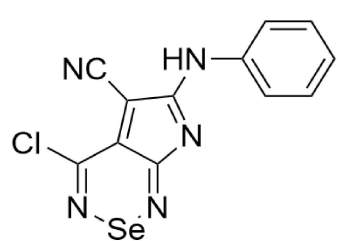

8.158  
8.029  
7.427  
7.207

4.219  
3.999

2.069  
2.065

Solvent peak

HOD +  
H2O

Unknown impurity  
from D2O

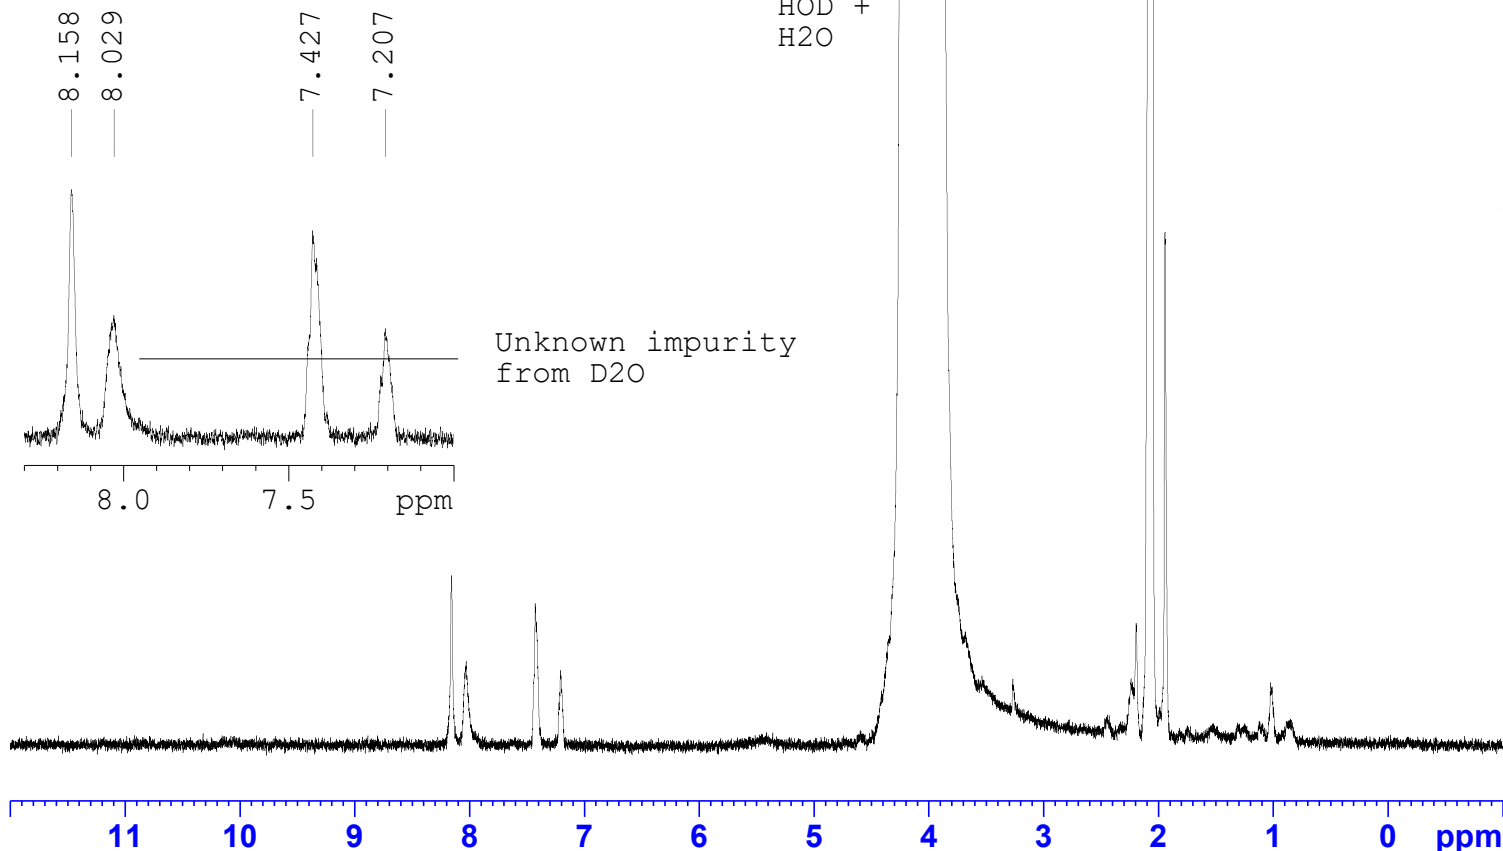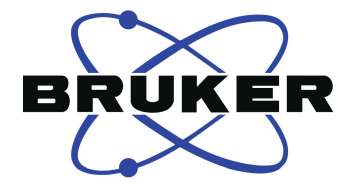

Current Data Parameters  
NAME nmr 500  
EXPNO 92  
PROCNO 1

F2 - Acquisition Parameters  
Date\_ 20230621  
Time\_ 15.16 h  
INSTRUM spect  
PROBHD z113652\_0078 (  
PULPROG zg30  
TD 65536  
SOLVENT Acetone  
NS 16  
DS 2  
SWH 10000.000 Hz  
FIDRES 0.305176 Hz  
AQ 3.2767999 sec  
RG 32  
DW 50.000 usec  
DE 13.55 usec  
TE 298.6 K  
D1 1.00000000 sec  
TD0 1  
SFO1 500.0360877 MHz  
NUC1 1H  
P0 4.00 usec  
P1 12.00 usec  
PLW1 16.34900093 W

F2 - Processing parameters  
SI 65536  
SF 500.0330000 MHz  
WDW EM  
SSB 0  
LB 0.30 Hz  
GB 0  
PC 1.00

4-Chloro-6-(phenylamino)pyrrolo[2,3-c][1,2,6]selenadiazine-5-carbonitrile 19

Very poor solubility, 6 C (s) missing

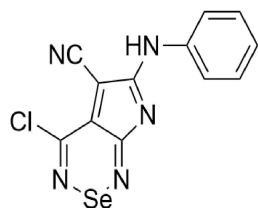

129.96  
125.89  
122.00  
113.66

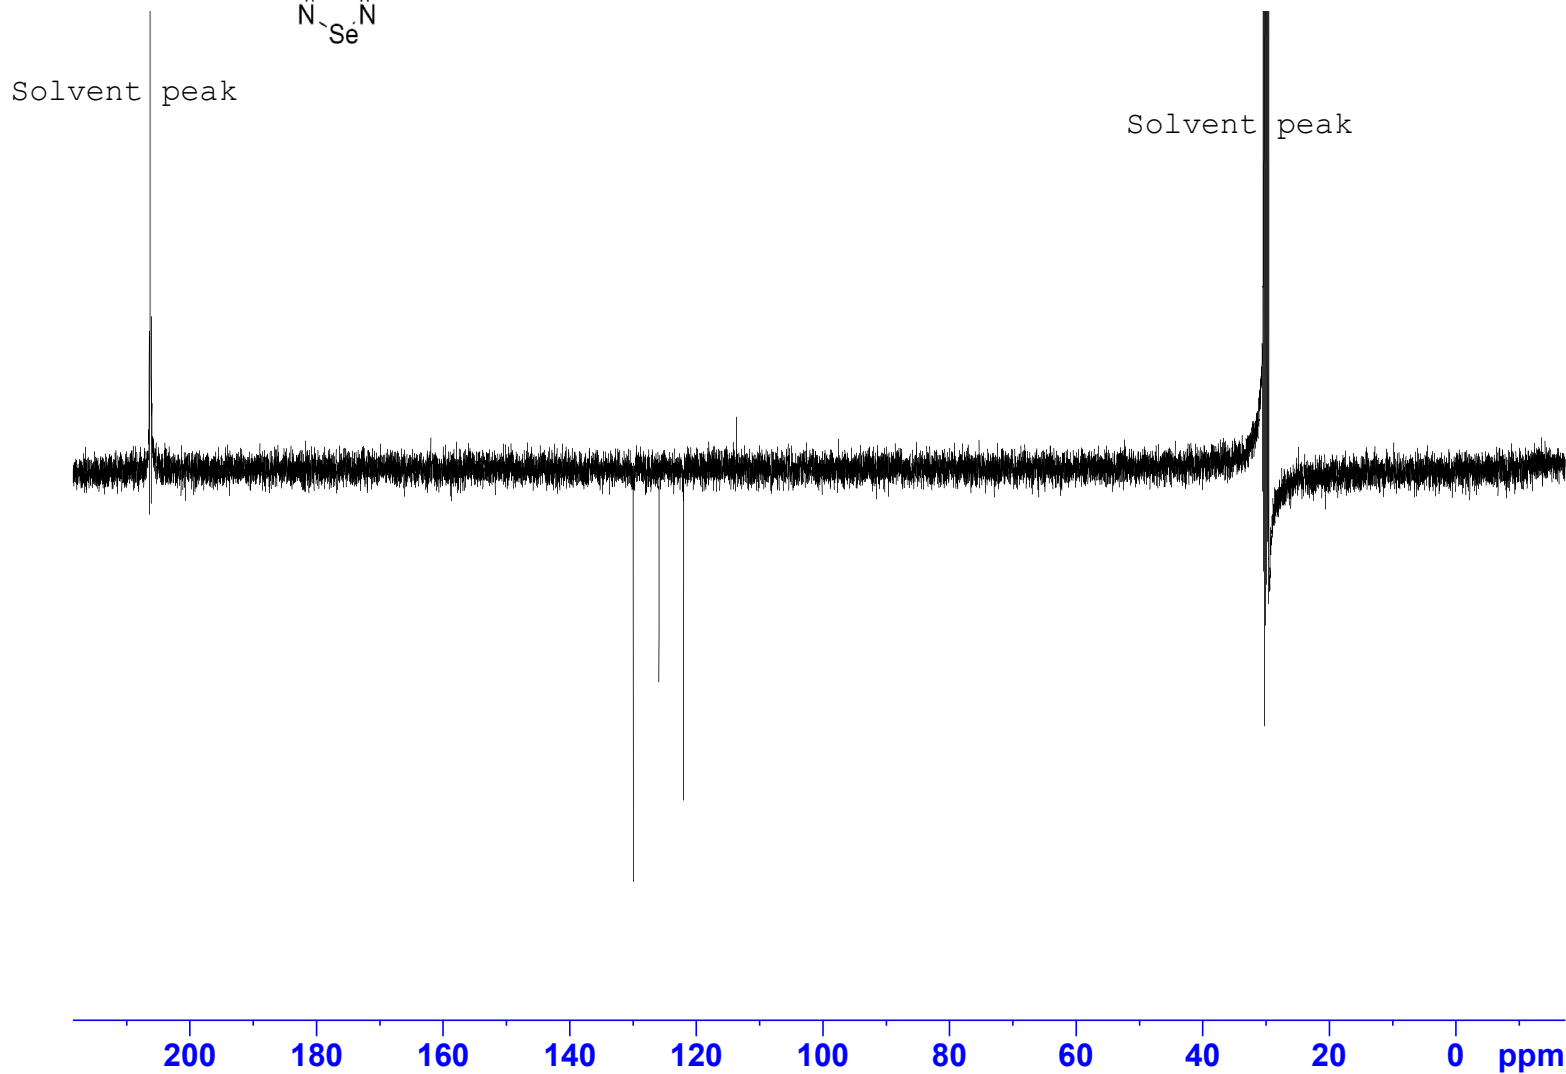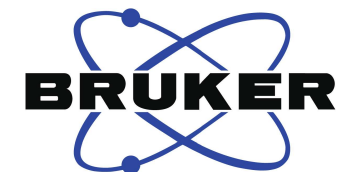

Current Data Parameters  
NAME nmr 500  
EXPNO 96  
PROCNO 1

F2 - Acquisition Parameters  
Date\_ 20230703  
Time\_ 8.45 h  
INSTRUM spect  
PROBHD z113652\_0078 (  
PULPROG jmod  
TD 65536  
SOLVENT Acetone  
NS 13312  
DS 4  
SWH 29761.904 Hz  
FIDRES 0.908261 Hz  
AQ 1.1010048 sec  
RG 2050  
DW 16.800 usec  
DE 6.50 usec  
TE 301.8 K  
CNST2 145.000000  
CNST11 1.0000000  
D1 2.0000000 sec  
D20 0.00689655 sec  
TD0 1  
SFO1 125.7459712 MHz  
NUC1 13C  
P1 10.00 usec  
P2 20.00 usec  
PLW1 121.36000061 W  
SFO2 500.0350001 MHz  
NUC2 1H  
CPDPRG[2] waltz65  
PCPD2 80.00 usec  
PLW2 16.34900093 W  
PLW12 0.34647381 W

F2 - Processing parameters  
SI 32768  
SF 125.7332646 MHz  
WDW EM  
SSB 0  
LB 1.00 Hz  
GB 0  
PC 1.40

4-Chloro-6-(dimethylamino)pyrrolo[2,3-c][1,2,6]selenadiazine-5-carbonitrile 20

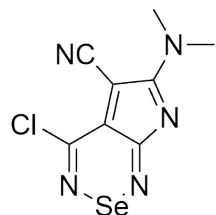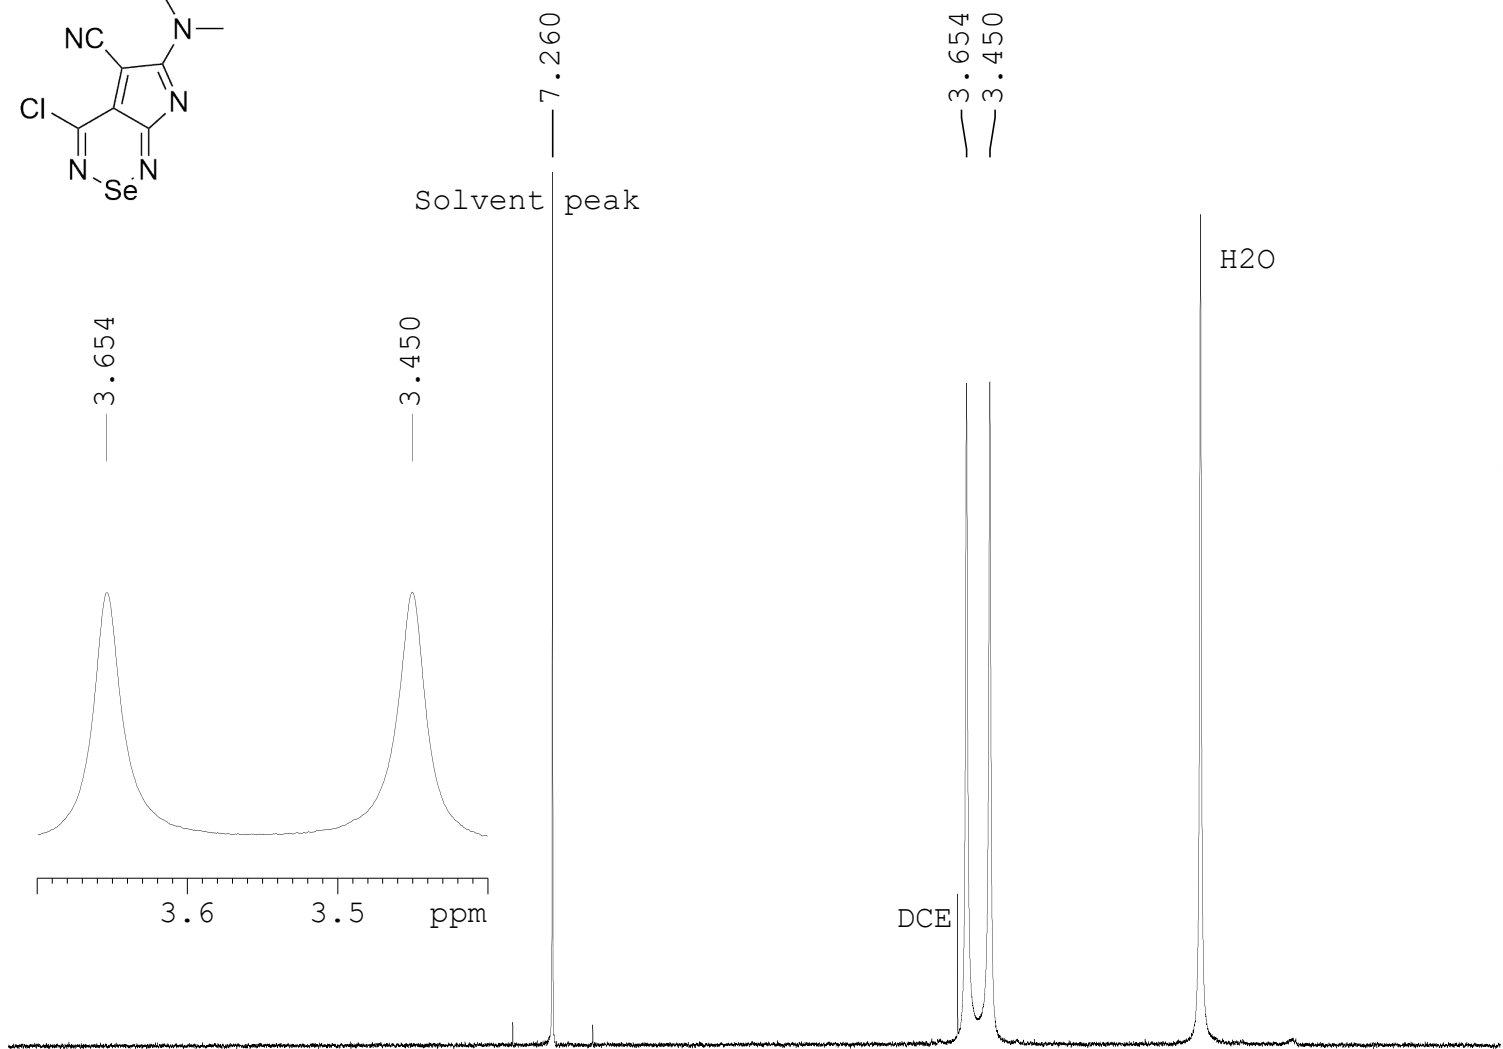

Current Data Parameters  
 NAME NMR 300  
 EXPNO 193  
 PROCNO 1

F2 - Acquisition Parameters  
 Date\_ 20230425  
 Time\_ 19.12 h  
 INSTRUM spect  
 PROBHD z104275\_0375 (  
 PULPROG zg30  
 TD 65536  
 SOLVENT CDCl3  
 NS 16  
 DS 2  
 SWH 6009.615 Hz  
 FIDRES 0.183399 Hz  
 AQ 5.4525952 sec  
 RG 201.81  
 DW 83.200 usec  
 DE 13.19 usec  
 TE -9.5 K  
 D1 1.00000000 sec  
 TD0 1  
 SFO1 300.1318533 MHz  
 NUC1 1H  
 P0 4.67 usec  
 P1 14.00 usec  
 PLW1 7.09999990 W

F2 - Processing parameters  
 SI 65536  
 SF 300.1300073 MHz  
 WDW EM  
 SSB 0  
 LB 0.30 Hz  
 GB 0  
 PC 1.00

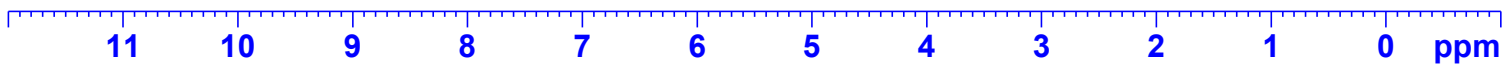

3.00  
2.93

4-Chloro-6-(dimethylamino)pyrrolo[2,3-c][1,2,6]selenadiazine-5-carbonitrile 20

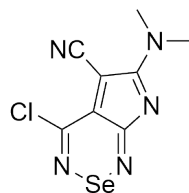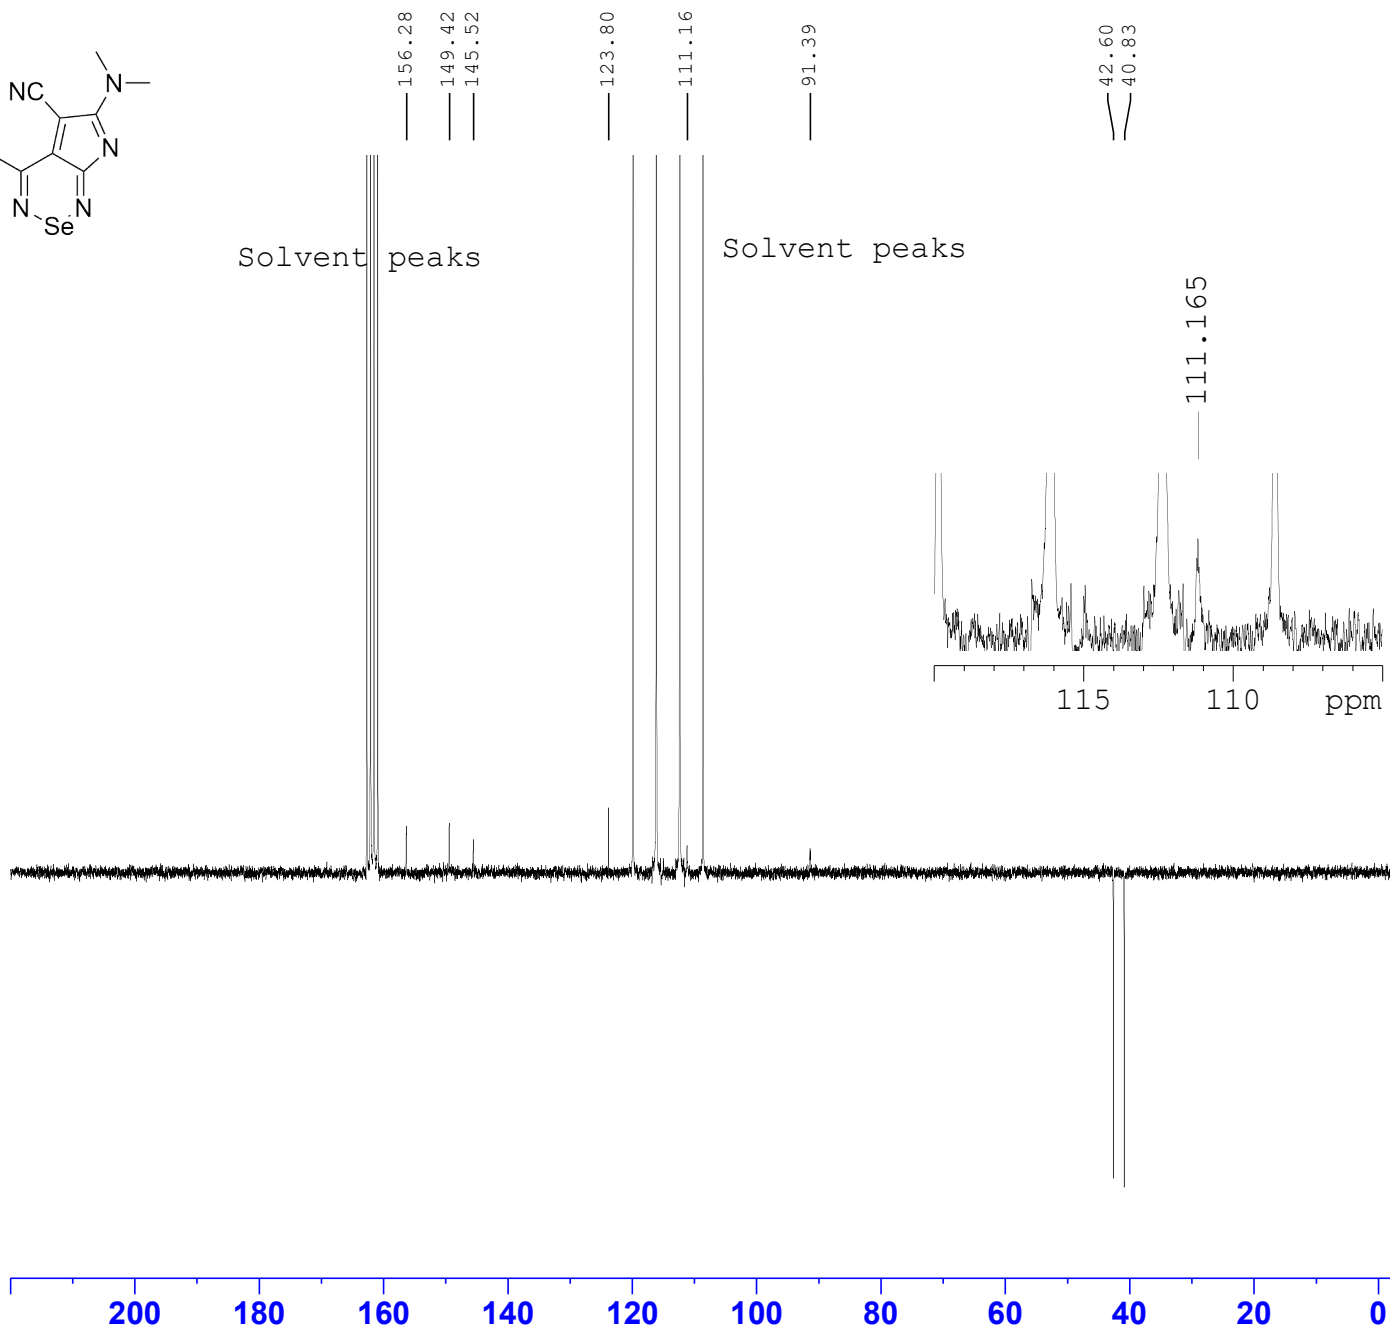

Current Data Parameters  
 NAME NMR 300  
 EXPNO 203  
 PROCNO 1

F2 - Acquisition Parameters  
 Date\_ 20230513  
 Time\_ 10.46 h  
 INSTRUM spect  
 PROBHD Z104275\_0375 (  
 PULPROG jmod  
 TD 65536  
 SOLVENT TFA-d  
 NS 13312  
 DS 4  
 SWH 18115.941 Hz  
 FIDRES 0.552855 Hz  
 AQ 1.8087935 sec  
 RG 201.81  
 DW 27.600 usec  
 DE 6.50 usec  
 TE 296.1 K  
 CNST2 145.000000  
 CNST11 1.0000000  
 D1 2.0000000 sec  
 D20 0.00689655 sec  
 TD0 1  
 SFO1 75.4752953 MHz  
 NUC1 13C  
 P1 10.00 usec  
 P2 20.00 usec  
 PLW1 45.0000000 W  
 SFO2 300.1312005 MHz  
 NUC2 1H  
 CPDPRG[2] waltz65  
 PCPD2 90.00 usec  
 PLW2 7.09999990 W  
 PLW12 0.17180000 W

F2 - Processing parameters  
 SI 32768  
 SF 75.4677485 MHz  
 WDW EM  
 SSB 0  
 LB 1.00 Hz  
 GB 0  
 PC 1.40

4-(Aziridin-1-yl)-6-chloropyrrolo[2,3-c][1,2,6]selenadiazine-5-carbonitrile 21

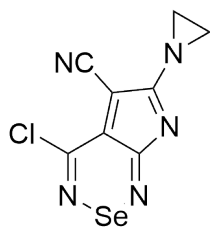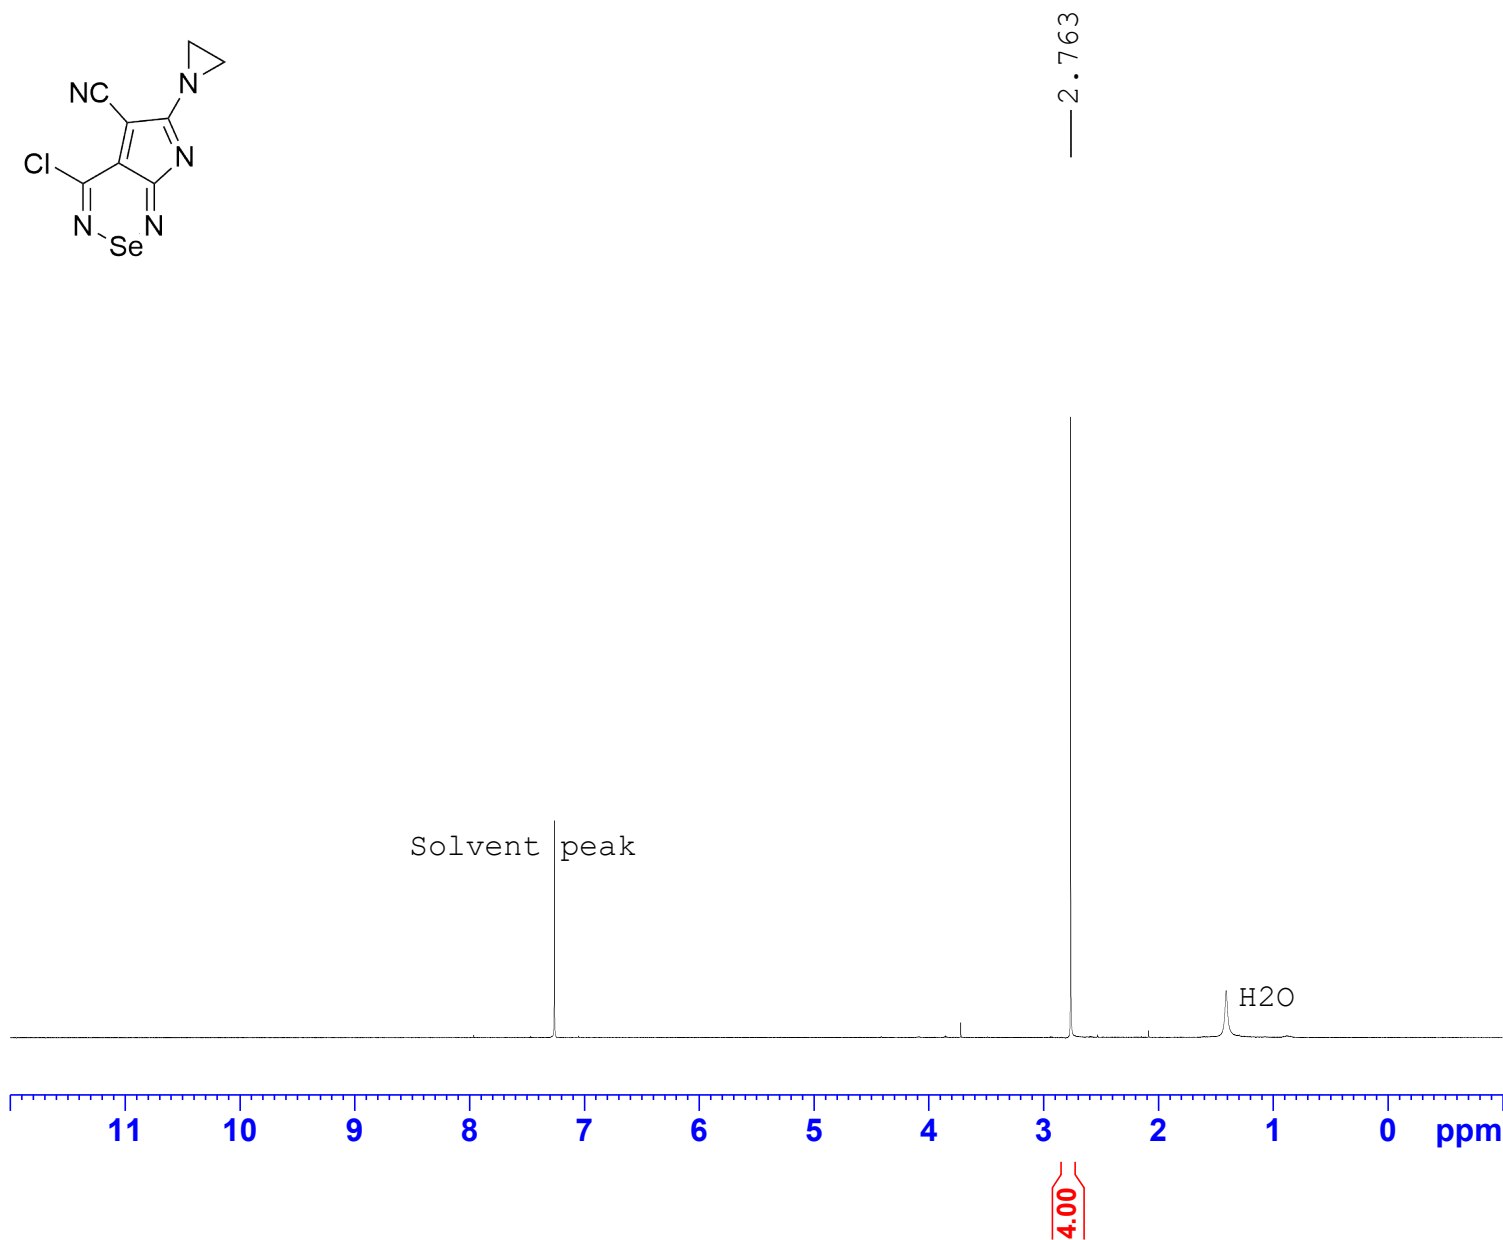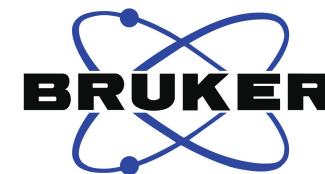

Current Data Parameters  
NAME nmr 500  
EXPNO 141  
PROCNO 1

F2 - Acquisition Parameters  
Date\_ 20230808  
Time\_ 15.13 h  
INSTRUM spect  
PROBHD z113652\_0078 (  
PULPROG zg30  
TD 65536  
SOLVENT CDCl3  
NS 16  
DS 2  
SWH 10000.000 Hz  
FIDRES 0.305176 Hz  
AQ 3.2767999 sec  
RG 456  
DW 50.000 usec  
DE 13.55 usec  
TE 353.2 K  
D1 1.00000000 sec  
TD0 1  
SFO1 500.0360877 MHz  
NUC1 1H  
P0 4.00 usec  
P1 12.00 usec  
PLW1 16.34900093 W

F2 - Processing parameters  
SI 65536  
SF 500.0330000 MHz  
WDW EM  
SSB 0  
LB 0.30 Hz  
GB 0  
PC 1.00

4-(Aziridin-1-yl)-6-chloropyrrolo[2,3-c][1,2,6]selenadiazine-5-carbonitrile 21

Very poor solubility, 6 C (s) missing

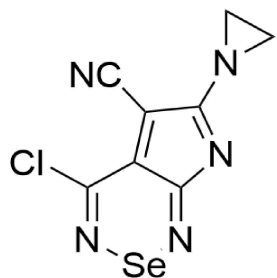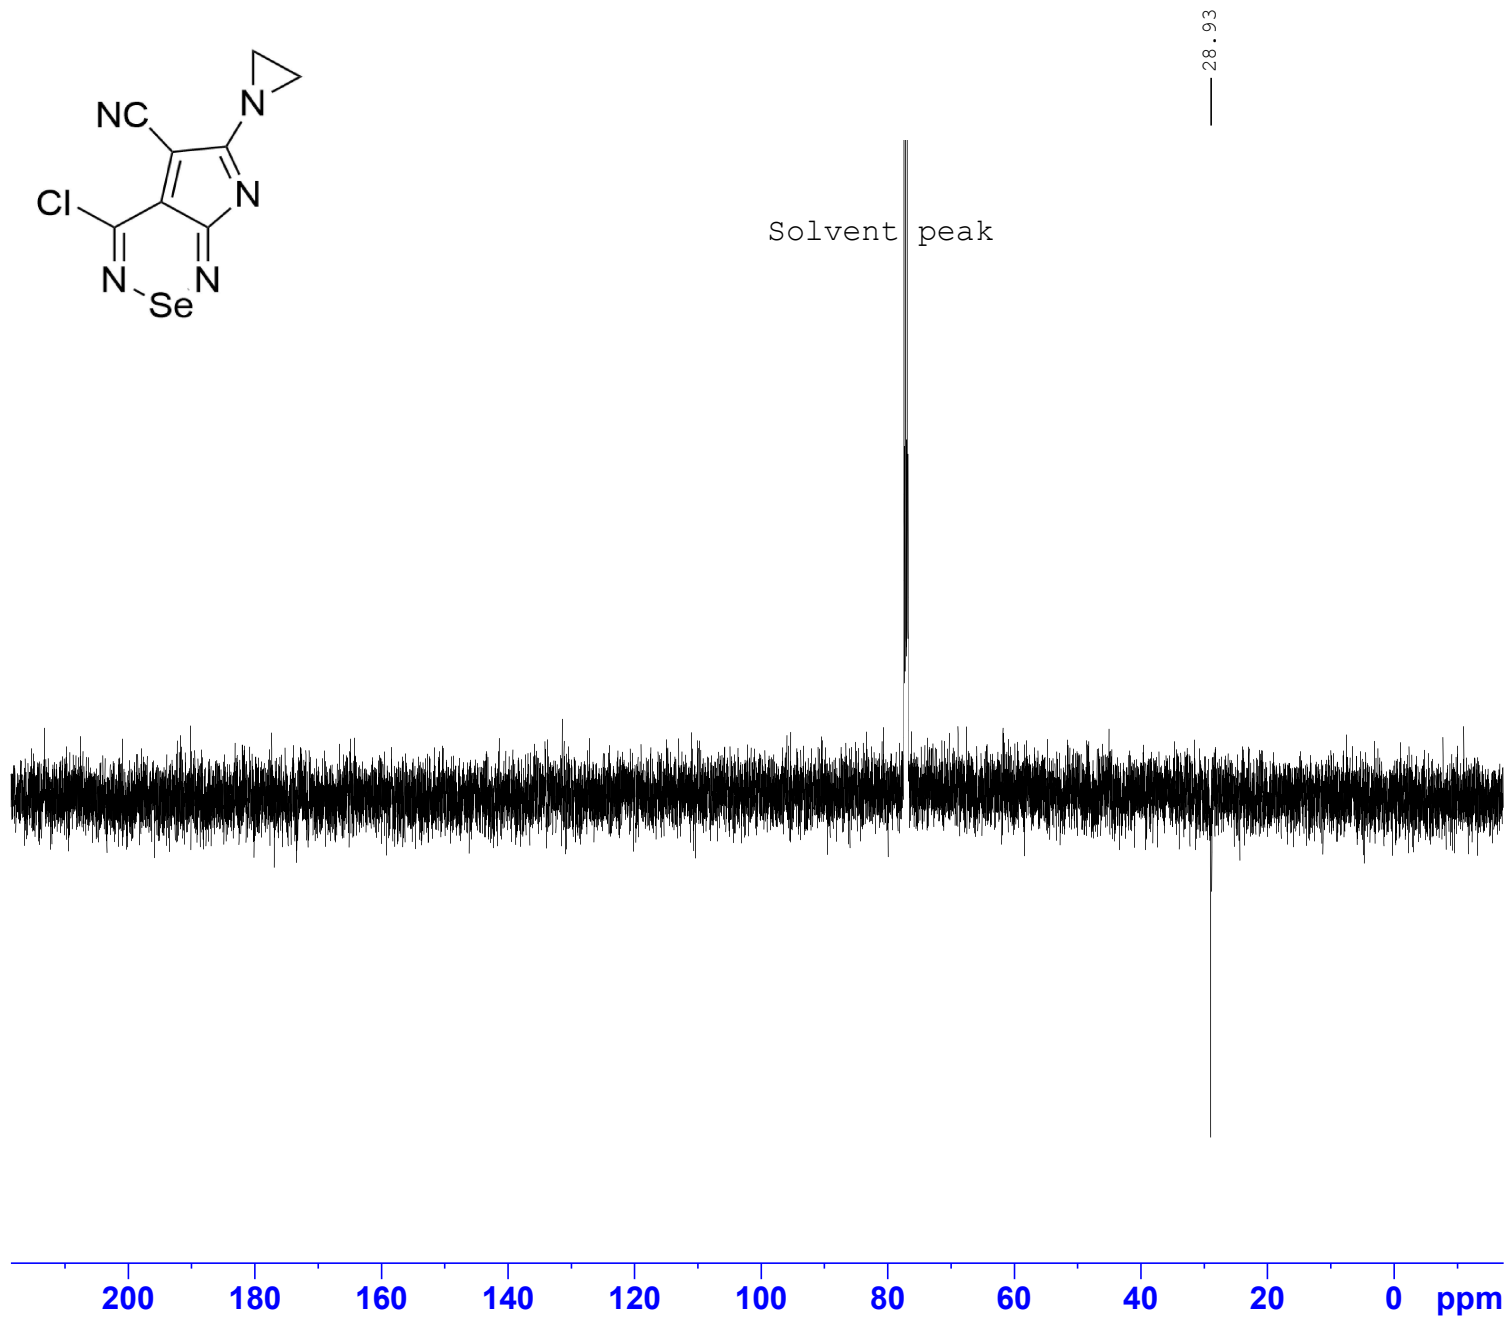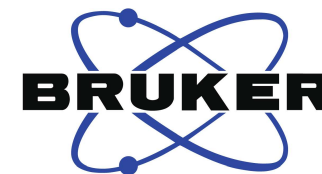

Current Data Parameters  
NAME nmr 500  
EXPNO 143  
PROCNO 1

F2 - Acquisition Parameters  
Date\_ 20230808  
Time\_ 17.31 h  
INSTRUM spect  
PROBHD z113652\_0078 (  
PULPROG jmod  
TD 65536  
SOLVENT CDC13  
NS 2581  
DS 4  
SWH 29761.904 Hz  
FIDRES 0.908261 Hz  
AQ 1.1010048 sec  
RG 2050  
DW 16.800 usec  
DE 6.50 usec  
TE 353.5 K  
CNST2 145.000000  
CNST11 1.0000000  
D1 2.0000000 sec  
D20 0.00689655 sec  
TD0 1  
SFO1 125.7459712 MHz  
NUC1 13C  
P1 10.00 usec  
P2 20.00 usec  
PLW1 121.36000061 W  
SFO2 500.0350001 MHz  
NUC2 1H  
CPDPRG[2] waltz65  
PCPD2 80.00 usec  
PLW2 16.34900093 W  
PLW12 0.34647381 W

F2 - Processing parameters  
SI 32768  
SF 125.7333760 MHz  
WDW EM  
SSB 0  
LB 1.00 Hz  
GB 0  
PC 1.40



6-(Azetidin-1-yl)-4-chloropyrrolo[2,3-c][1,2,6]selenadiazine-5-carbonitrile 22

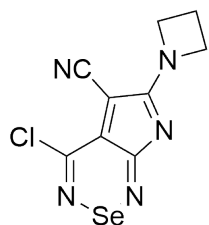

— 4.988  
— 4.643  
— 2.755



Current Data Parameters  
NAME nmr 500  
EXPNO 54  
PROCNO 1

F2 - Acquisition Parameters  
Date\_ 20230328  
Time\_ 22.52 h  
INSTRUM spect  
PROBHD z113652\_0078 (  
PULPROG zg30  
TD 65536  
SOLVENT TFA2  
NS 16  
DS 2  
SWH 10000.000 Hz  
FIDRES 0.305176 Hz  
AQ 3.2767999 sec  
RG 181  
DW 50.000 usec  
DE 13.55 usec  
TE 295.6 K  
D1 1.00000000 sec  
TD0 1  
SFO1 500.0360877 MHz  
NUC1 1H  
P0 4.00 usec  
P1 12.00 usec  
PLW1 16.34900093 W

F2 - Processing parameters  
SI 65536  
SF 500.0330657 MHz  
WDW EM  
SSB 0  
LB 0.30 Hz  
GB 0  
PC 1.00

Solvent peak

DCE

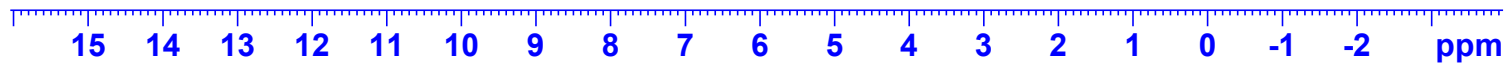

2.00  
2.02  
2.04

6-(Azetidin-1-yl)-4-chloropyrrolo[2,3-c][1,2,6]selenadiazine-5-carbonitrile 22

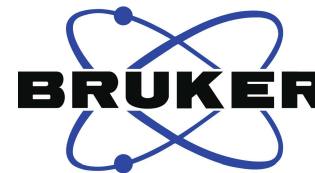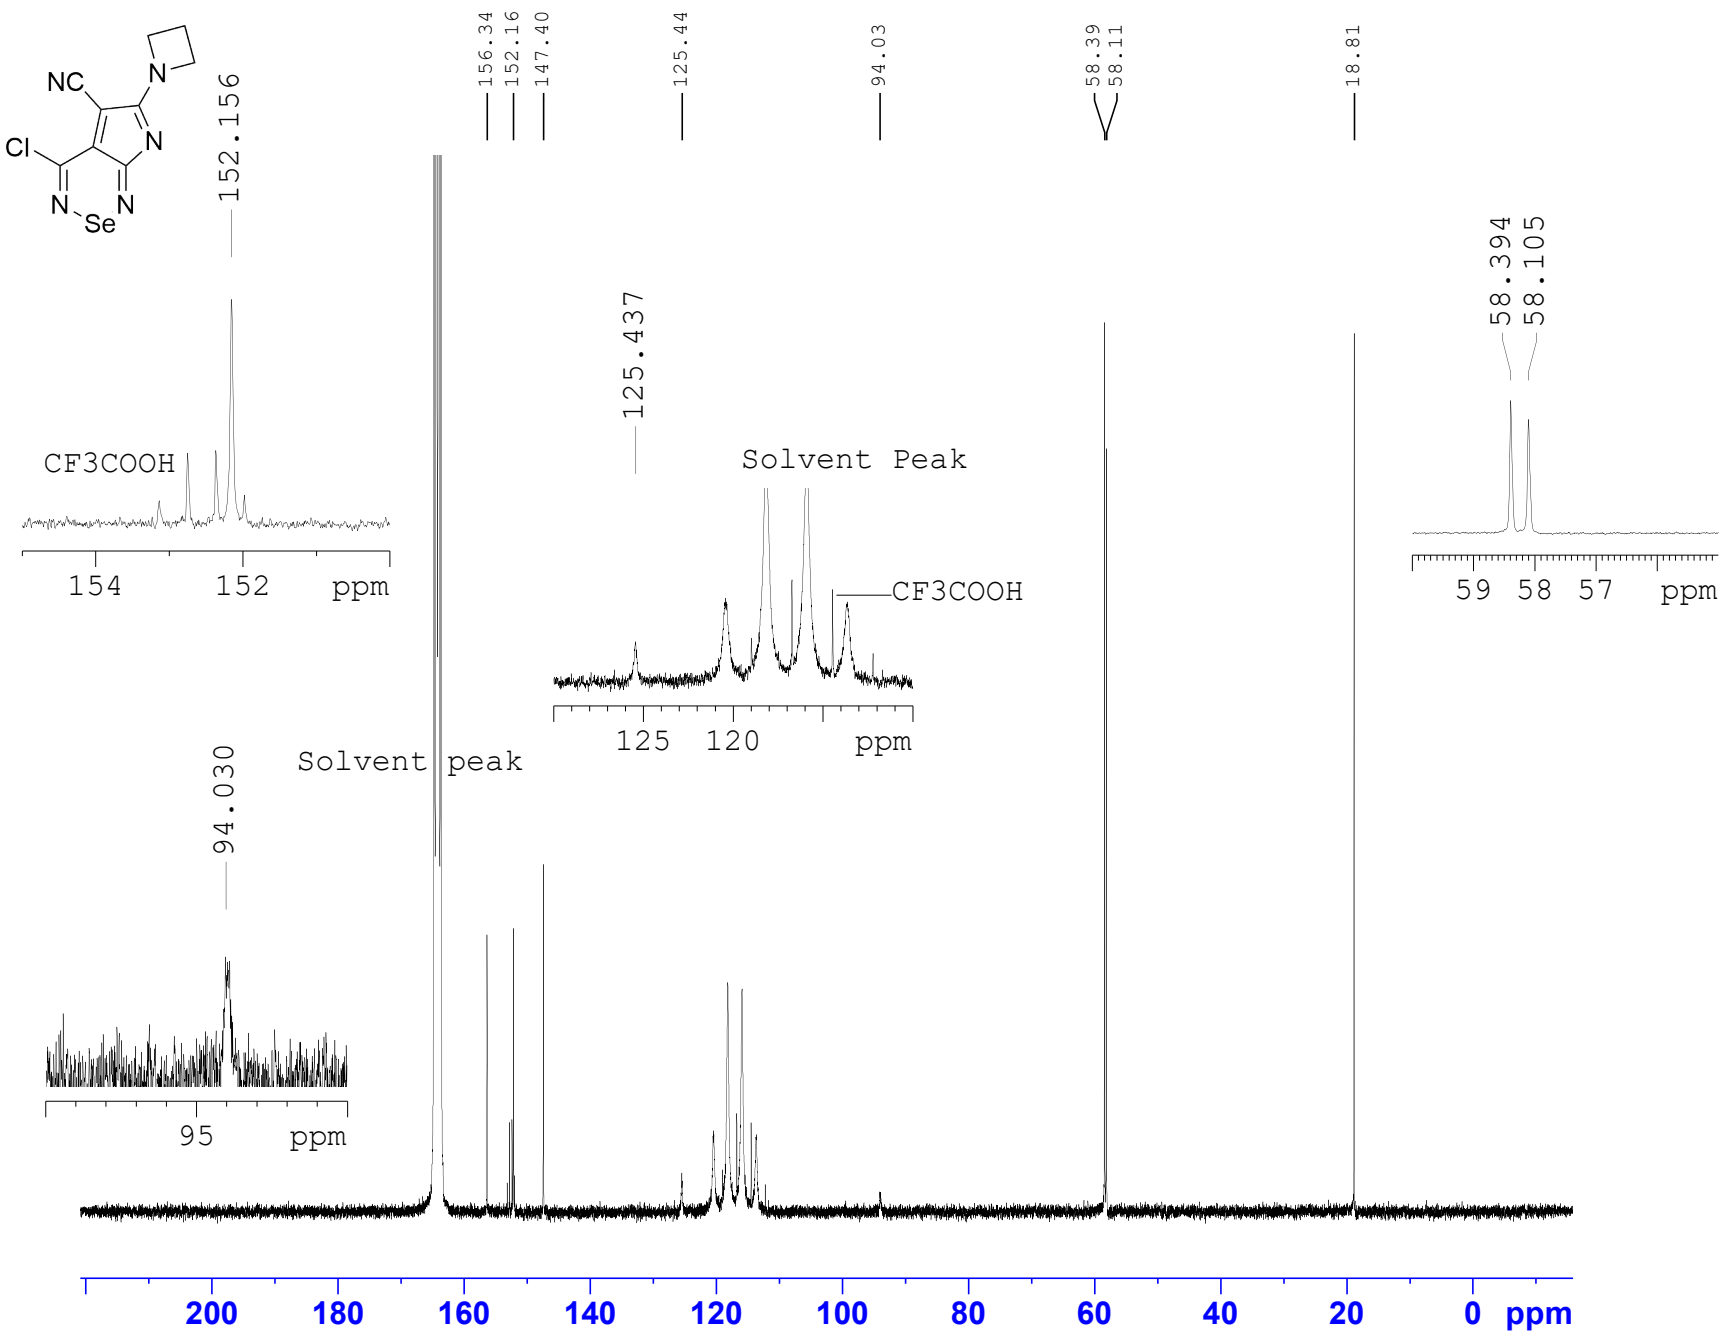

Current Data Parameters  
 NAME nmr 500  
 EXPNO 56  
 PROCNO 1

F2 - Acquisition Parameters

Date\_ 20230329  
 Time\_ 8.46 h  
 INSTRUM spect  
 PROBHD z113652\_0078 (  
 PULPROG jmod  
 TD 65536  
 SOLVENT TFA2  
 NS 10240  
 DS 4  
 SWH 29761.904 Hz  
 FIDRES 0.908261 Hz  
 AQ 1.1010048 sec  
 RG 2050  
 DW 16.800 usec  
 DE 6.50 usec  
 TE 299.0 K  
 CNST2 145.000000  
 CNST11 1.000000  
 D1 2.00000000 sec  
 D20 0.00689655 sec  
 TD0 1  
 SFO1 125.7459712 MHz  
 NUC1 13C  
 P1 10.00 usec  
 P2 20.00 usec  
 PLW1 121.36000061 W  
 SFO2 500.0350001 MHz  
 NUC2 1H  
 CPDPRG[2] waltz65  
 PCPD2 80.00 usec  
 PLW2 16.34900093 W  
 PLW12 0.34647381 W

F2 - Processing parameters

SI 32768  
 SF 125.7330836 MHz  
 WDW EM  
 SSB 0  
 LB 1.00 Hz  
 GB 0  
 PC 1.40

4-Chloro-6-(pyrrolidin-1-yl)pyrrolo[2,3-c][1,2,6]selenadiazine-5-carbonitrile 23

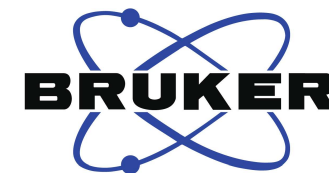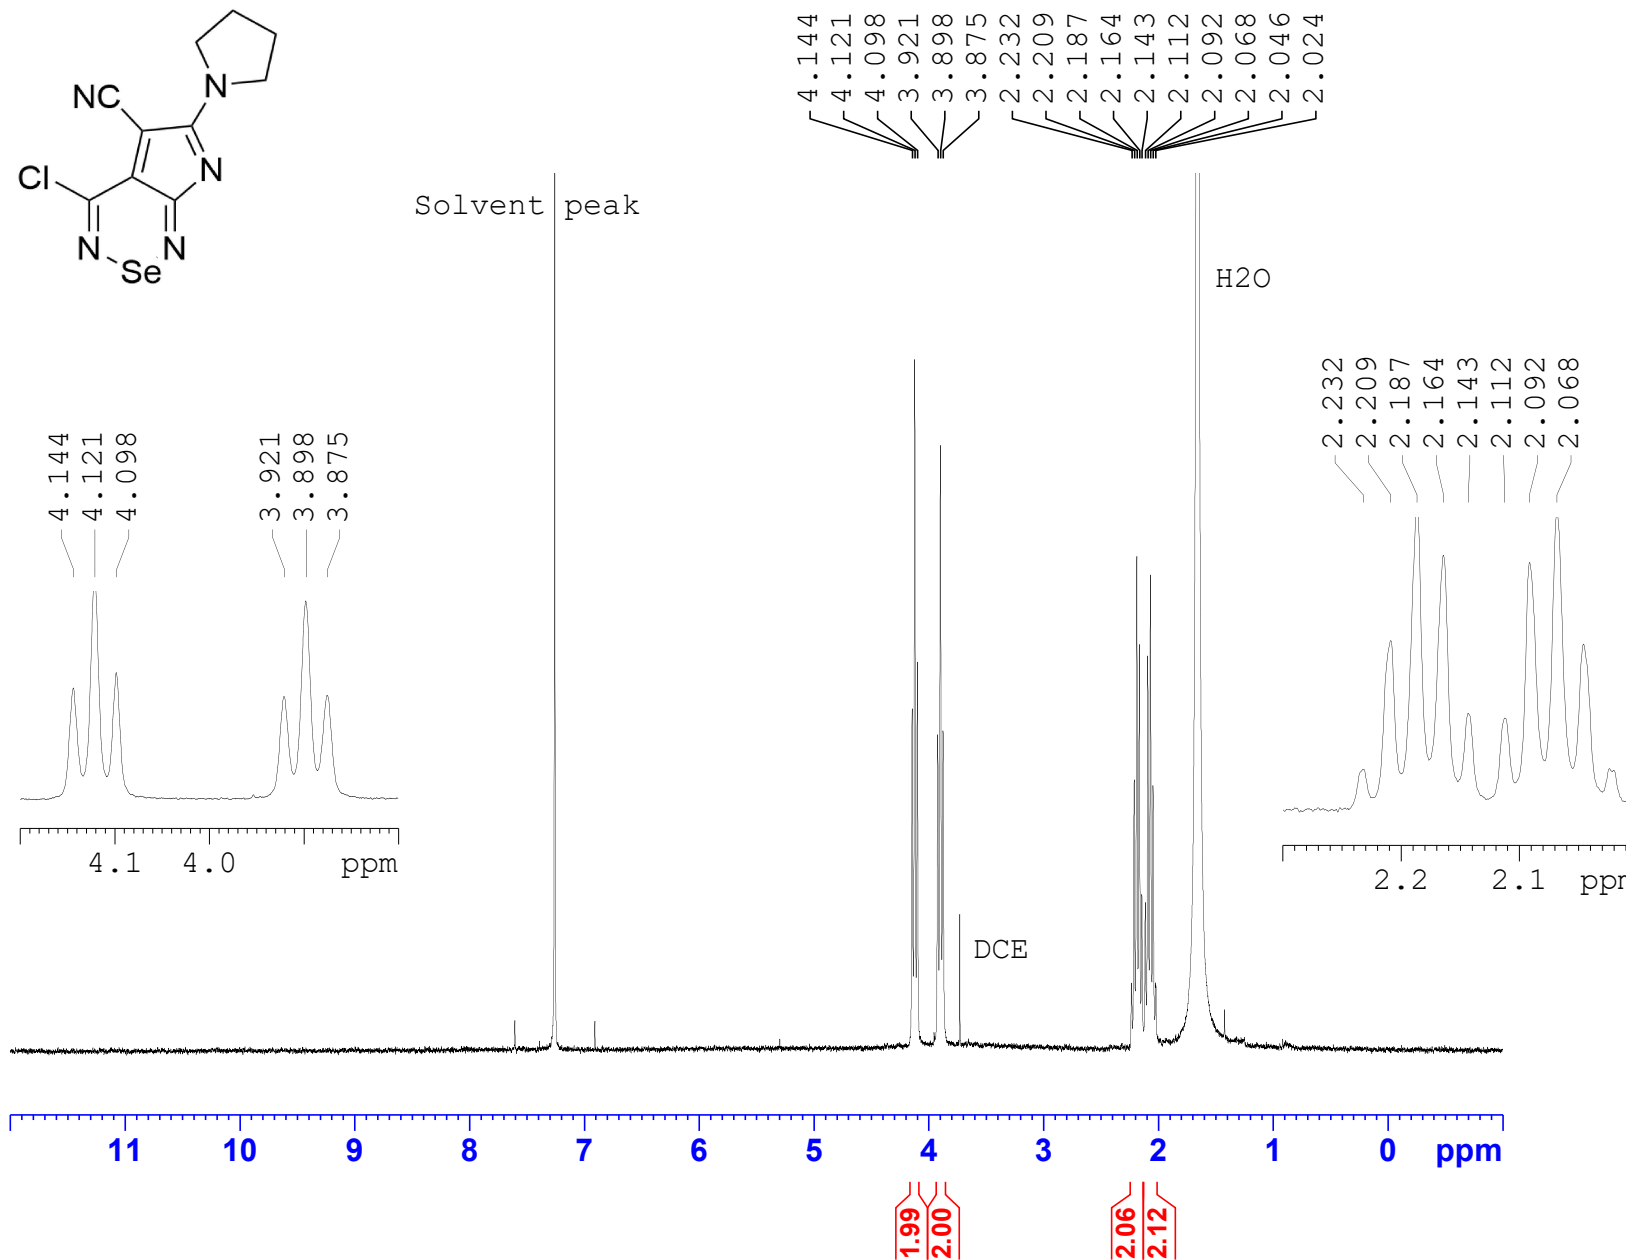

Current Data Parameters  
 NAME NMR 300  
 EXPNO 123  
 PROCNO 1

F2 - Acquisition Parameters  
 Date\_ 20221105  
 Time\_ 18.40 h  
 INSTRUM spect  
 PROBHD z104275\_0375 (  
 PULPROG zg30  
 TD 65536  
 SOLVENT CDC13  
 NS 64  
 DS 2  
 SWH 6009.615 Hz  
 FIDRES 0.183399 Hz  
 AQ 5.4525952 sec  
 RG 201.81  
 DW 83.200 usec  
 DE 6.50 usec  
 TE 298.0 K  
 D1 1.00000000 sec  
 TD0 1  
 SFO1 300.1318533 MHz  
 NUC1 1H  
 P1 14.00 usec  
 PLW1 7.85570002 W

F2 - Processing parameters  
 SI 65536  
 SF 300.1300079 MHz  
 WDW EM  
 SSB 0  
 LB 0.30 Hz  
 GB 0  
 PC 1.00

4-Chloro-6-(pyrrolidin-1-yl)pyrrolo[2,3-c][1,2,6]selenadiazine-5-carbonitrile 23

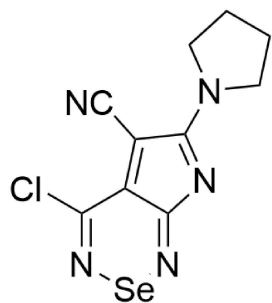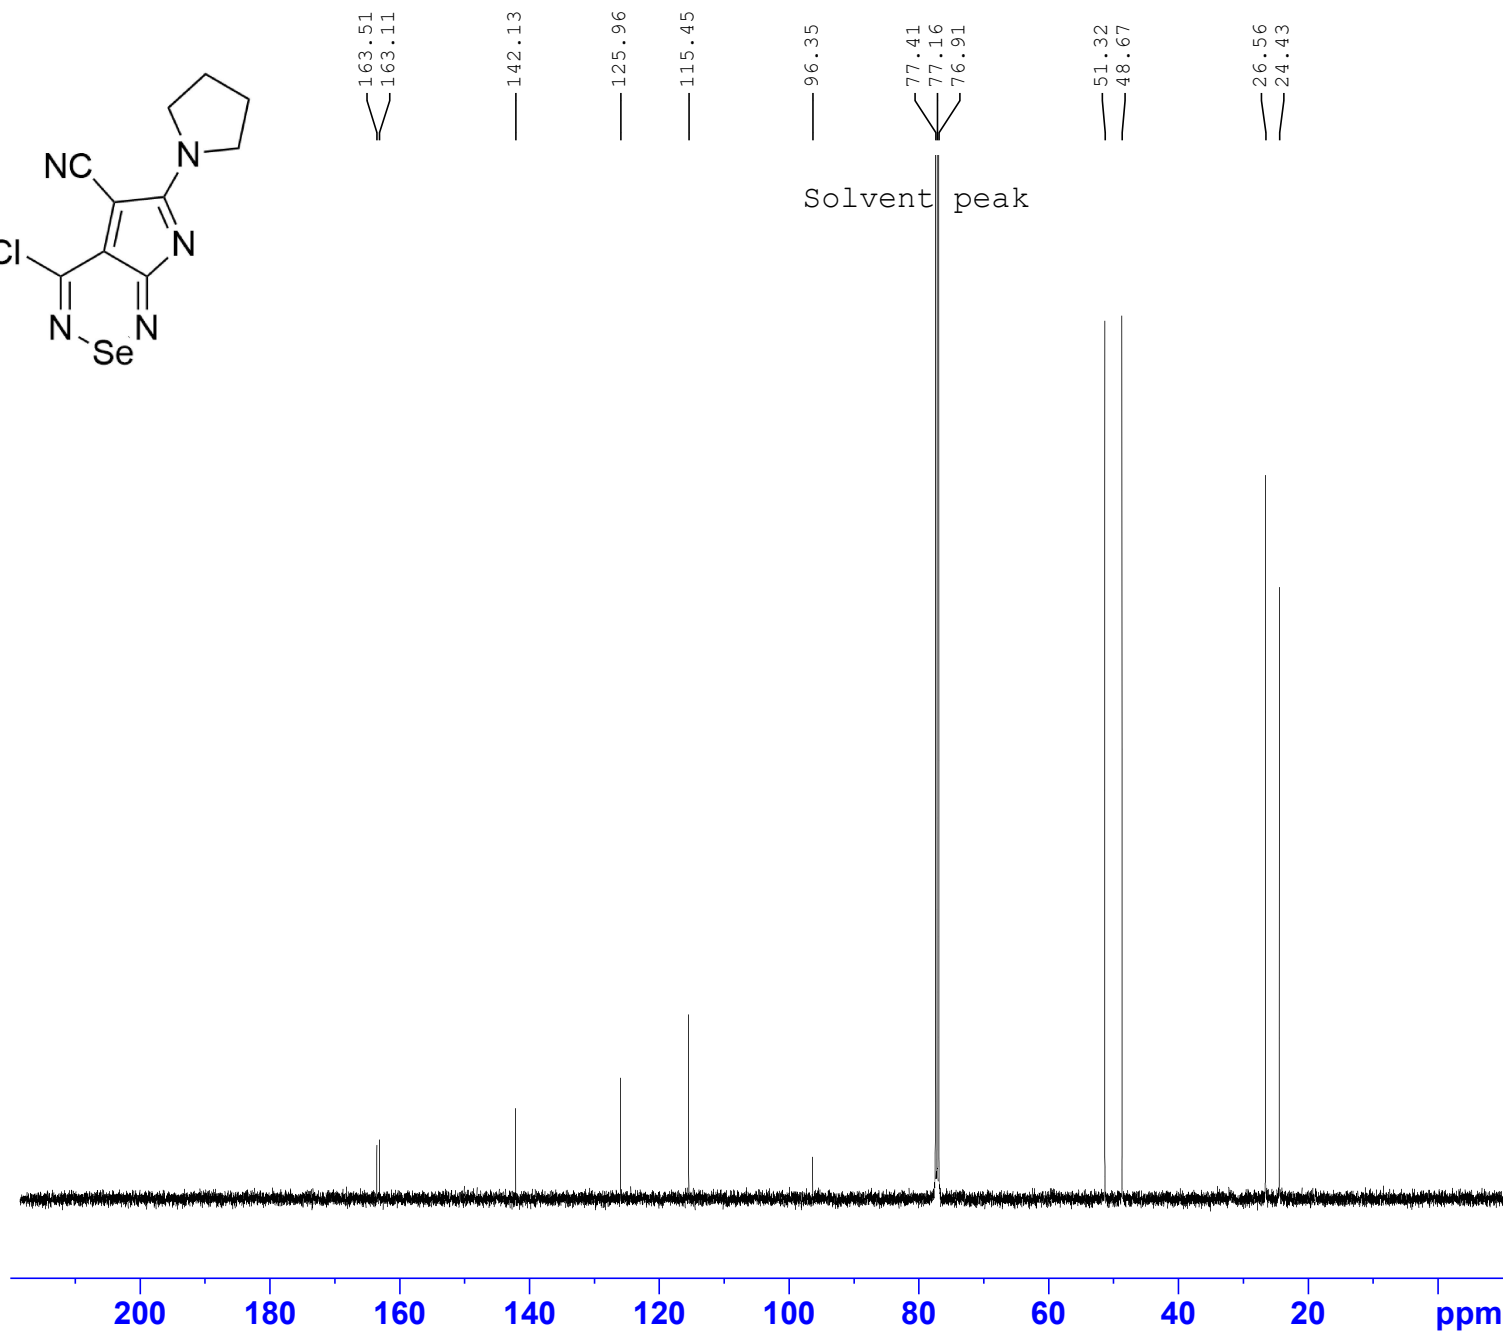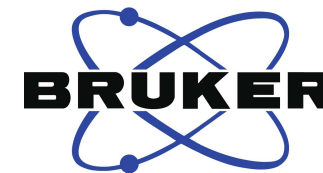

Current Data Parameters  
 NAME nmr 500  
 EXPNO 37  
 PROCNO 1

F2 - Acquisition Parameters  
 Date\_ 20230312  
 Time\_ 8.38 h  
 INSTRUM spect  
 PROBHD Z113652\_0078 (  
 PULPROG jmod  
 TD 65536  
 SOLVENT CDC13  
 NS 14336  
 DS 4  
 SWH 29761.904 Hz  
 FIDRES 0.908261 Hz  
 AQ 1.1010048 sec  
 RG 2050  
 DW 16.800 usec  
 DE 6.50 usec  
 TE 299.6 K  
 CNST2 145.0000000  
 CNST11 1.0000000  
 D1 2.00000000 sec  
 D20 0.00689655 sec  
 TD0 1  
 SFO1 125.7459712 MHz  
 NUC1 13C  
 P1 10.00 usec  
 P2 20.00 usec  
 PLW1 121.36000061 W  
 SFO2 500.0350001 MHz  
 NUC2 1H  
 CPDPRG[2] waltz65  
 PCPD2 80.00 usec  
 PLW2 16.34900093 W  
 PLW12 0.34647381 W

F2 - Processing parameters  
 SI 32768  
 SF 125.7333803 MHz  
 WDW EM  
 SSB 0  
 LB 1.00 Hz  
 GB 0  
 PC 1.40

4-Chloro-6-(piperidin-1-yl)pyrrolo[2,3-c][1,2,6]selenadiazine-5-carbonitrile 24

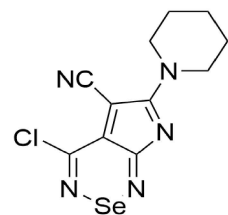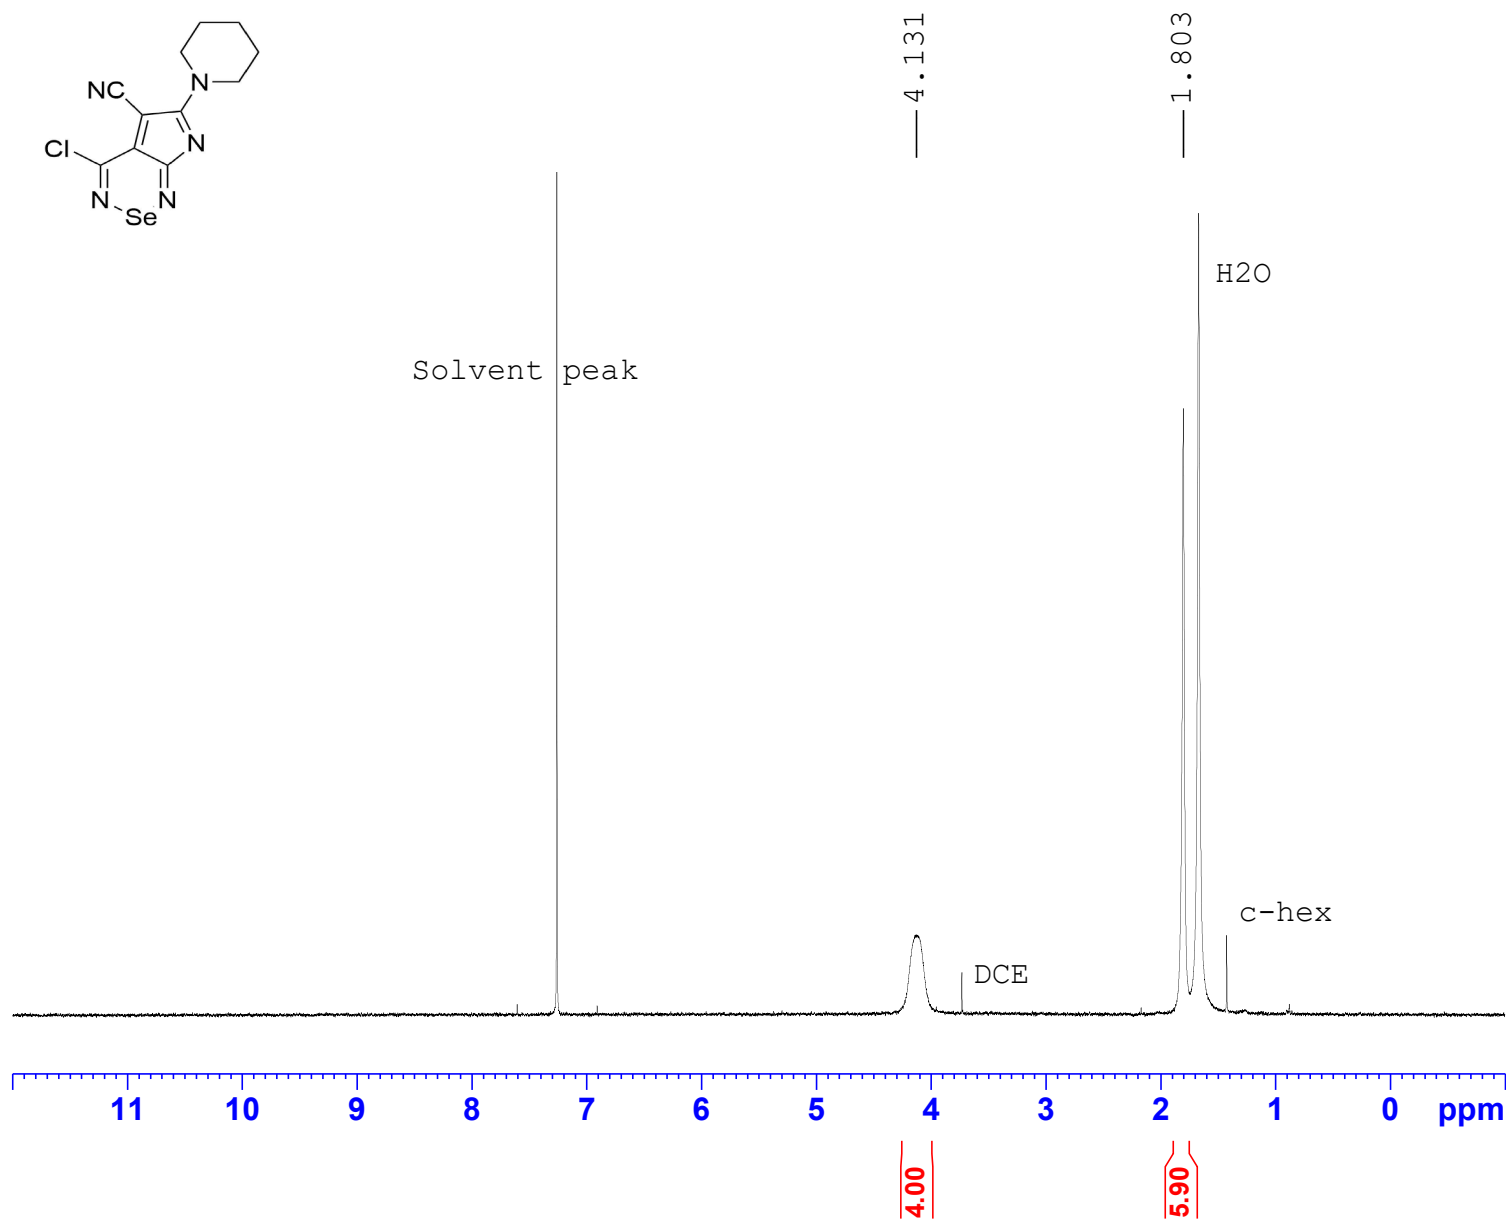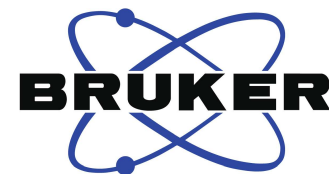

Current Data Parameters  
NAME NMR 300  
EXPNO 135  
PROCNO 1

F2 - Acquisition Parameters  
Date\_ 20221116  
Time 18.58 h  
INSTRUM spect  
PROBHD z104275\_0375 (  
PULPROG zg30  
TD 65536  
SOLVENT CDC13  
NS 16  
DS 2  
SWH 6009.615 Hz  
FIDRES 0.183399 Hz  
AQ 5.4525952 sec  
RG 201.81  
DW 83.200 usec  
DE 6.50 usec  
TE 298.0 K  
D1 1.00000000 sec  
TD0 1  
SFO1 300.1318533 MHz  
NUC1 1H  
P1 14.00 usec  
PLW1 7.85570002 W

F2 - Processing parameters  
SI 65536  
SF 300.1300000 MHz  
WDW EM  
SSB 0  
LB 0.30 Hz  
GB 0  
PC 1.00

4-Chloro-6-(piperidin-1-yl)pyrrolo[2,3-c][1,2,6]selenadiazine-5-carbonitrile 24

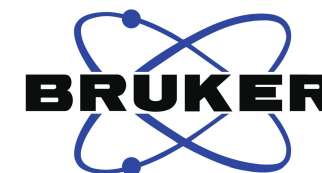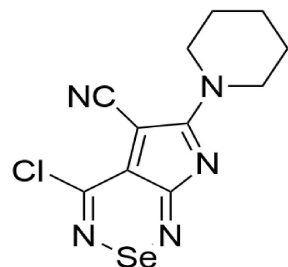

164.71  
162.69  
141.90  
126.85  
115.62  
95.41  
49.72  
48.40  
26.91  
25.78  
24.14

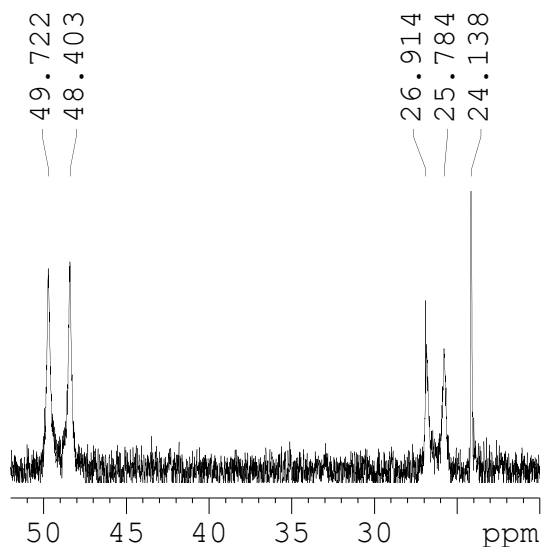

Solvent peak

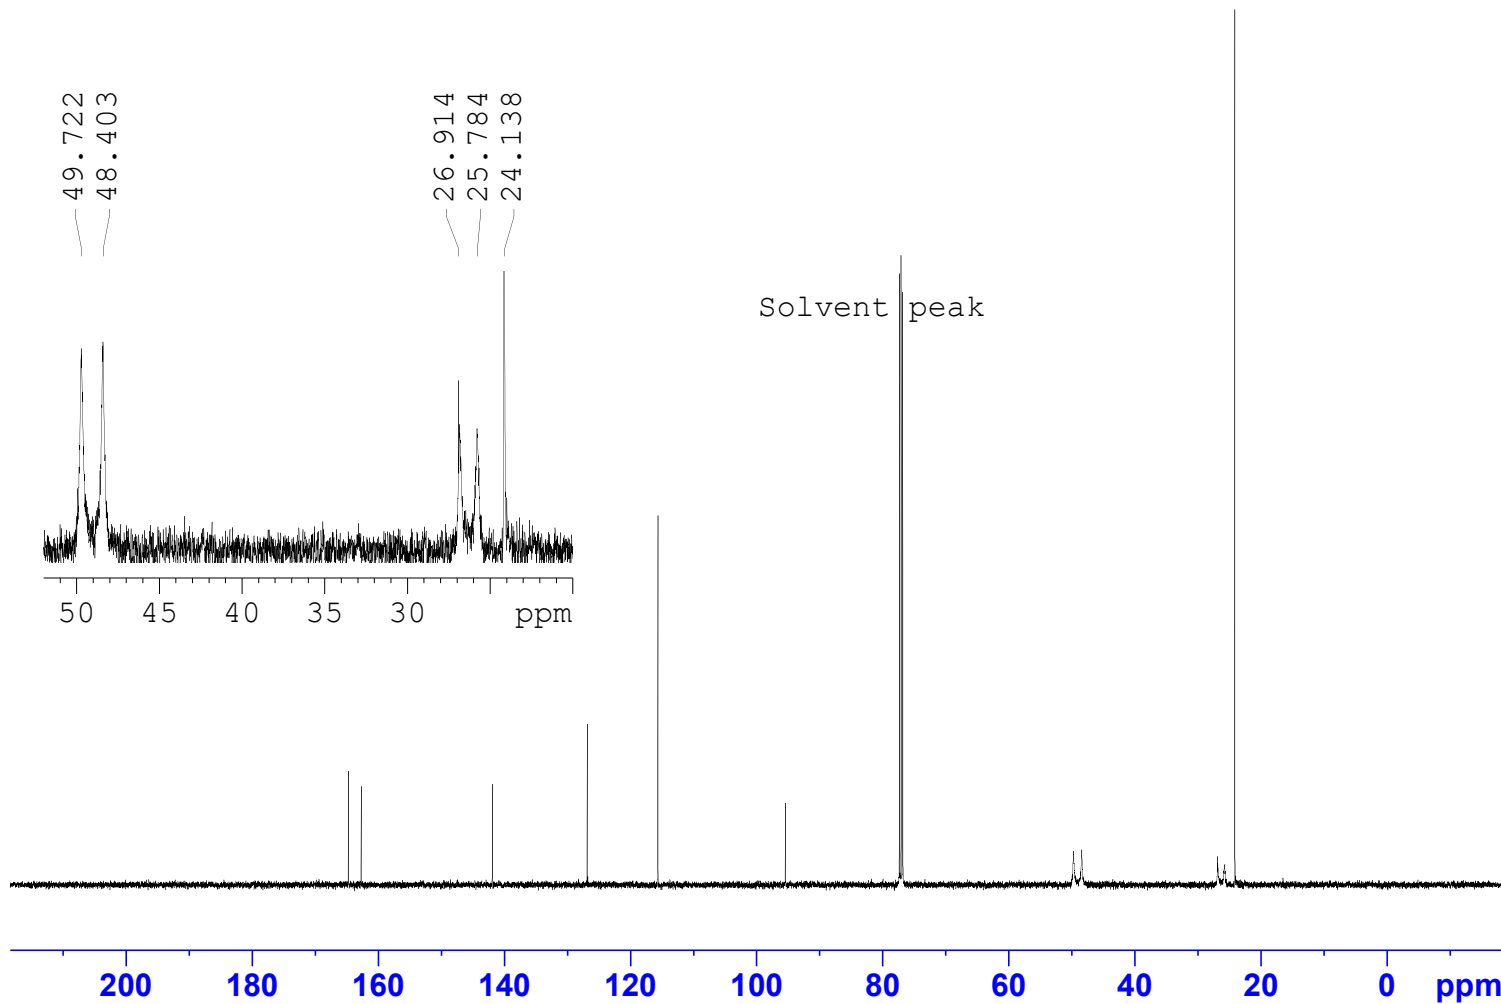

Current Data Parameters  
NAME nmr 500  
EXPNO 35  
PROCNO 1

F2 - Acquisition Parameters

Date\_ 20230306  
Time\_ 20.00 h  
INSTRUM spect  
PROBHD z113652\_0078 (  
PULPROG jmod  
TD 65536  
SOLVENT CDC13  
NS 4352  
DS 4  
SWH 29761.904 Hz  
FIDRES 0.908261 Hz  
AQ 1.1010048 sec  
RG 2050  
DW 16.800 usec  
DE 6.50 usec  
TE 297.6 K  
CNST2 145.0000000  
CNST11 1.0000000  
D1 2.00000000 sec  
D20 0.00689655 sec  
TD0 1  
SFO1 125.7459712 MHz  
NUC1 13C  
P1 10.00 usec  
P2 20.00 usec  
PLW1 121.36000061 W  
SFO2 500.0350001 MHz  
NUC2 1H  
CPDPRG[2] waltz65  
PCPD2 80.00 usec  
PLW2 16.34900093 W  
PLW12 0.34647381 W

F2 - Processing parameters

SI 32768  
SF 125.7333979 MHz  
WDW EM  
SSB 0  
LB 1.00 Hz  
GB 0  
PC 1.40

4-Chloro-6-(4-methylpiperazin-1-yl)pyrrolo[2,3-c][1,2,6]selenadiazine-5-carbonitrile 25

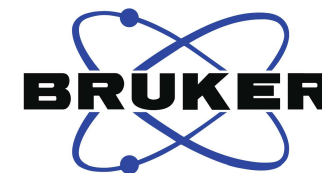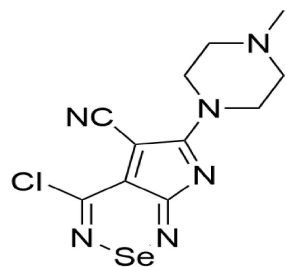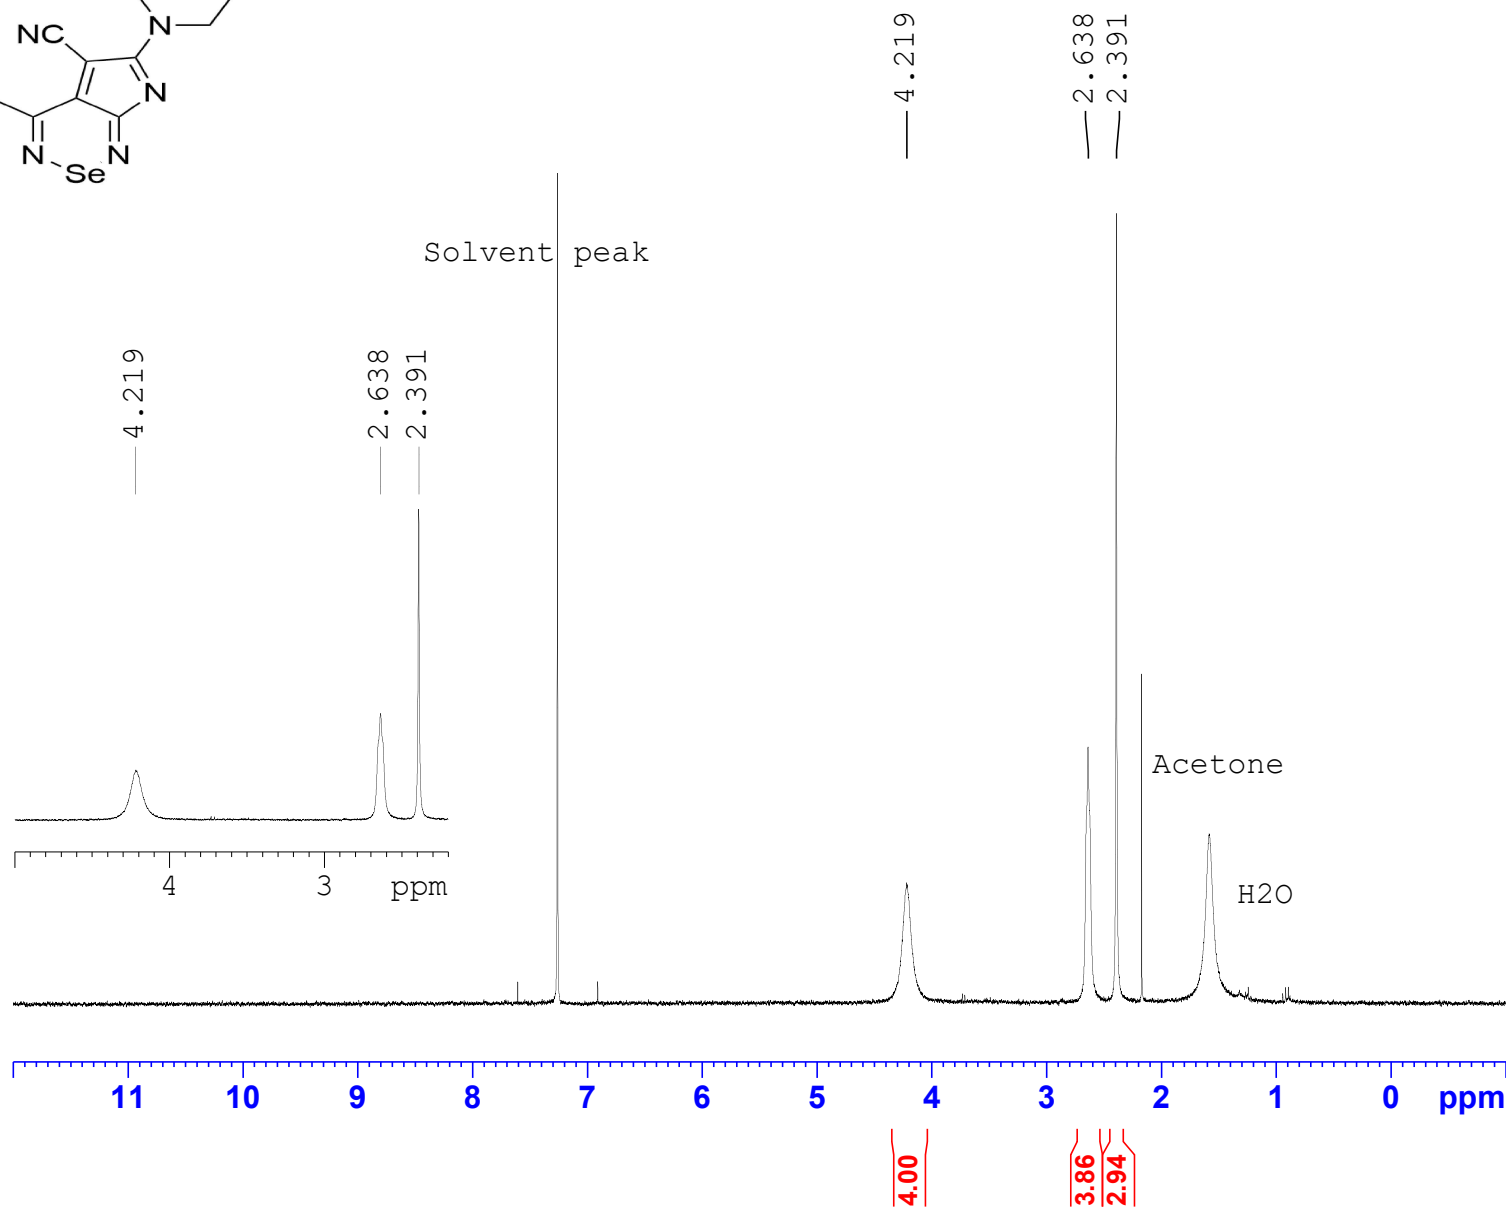

Current Data Parameters  
 NAME NMR 300  
 EXPNO 153  
 PROCNO 1

F2 - Acquisition Parameters  
 Date\_ 20230105  
 Time\_ 19.34 h  
 INSTRUM spect  
 PROBHD Z104275\_0375 ( )  
 PULPROG zg30  
 TD 65536  
 SOLVENT CDCl3  
 NS 16  
 DS 2  
 SWH 6009.615 Hz  
 FIDRES 0.183399 Hz  
 AQ 5.4525952 sec  
 RG 201.81  
 DW 83.200 usec  
 DE 6.50 usec  
 TE 295.3 K  
 D1 1.00000000 sec  
 TD0 1  
 SFO1 300.1318533 MHz  
 NUC1 1H  
 P1 14.00 usec  
 PLW1 7.85570002 W

F2 - Processing parameters  
 SI 65536  
 SF 300.1300074 MHz  
 WDW EM  
 SSB 0  
 LB 0.30 Hz  
 GB 0  
 PC 1.00

4-Chloro-6-(4-methylpiperazin-1-yl) [2,3-c] [1,2,6] selenadiazine-5-carbonitrile 25

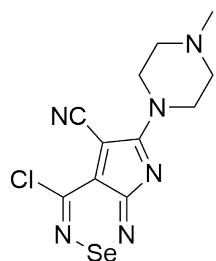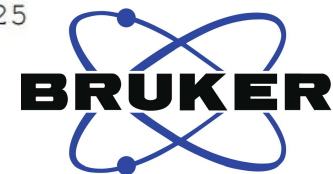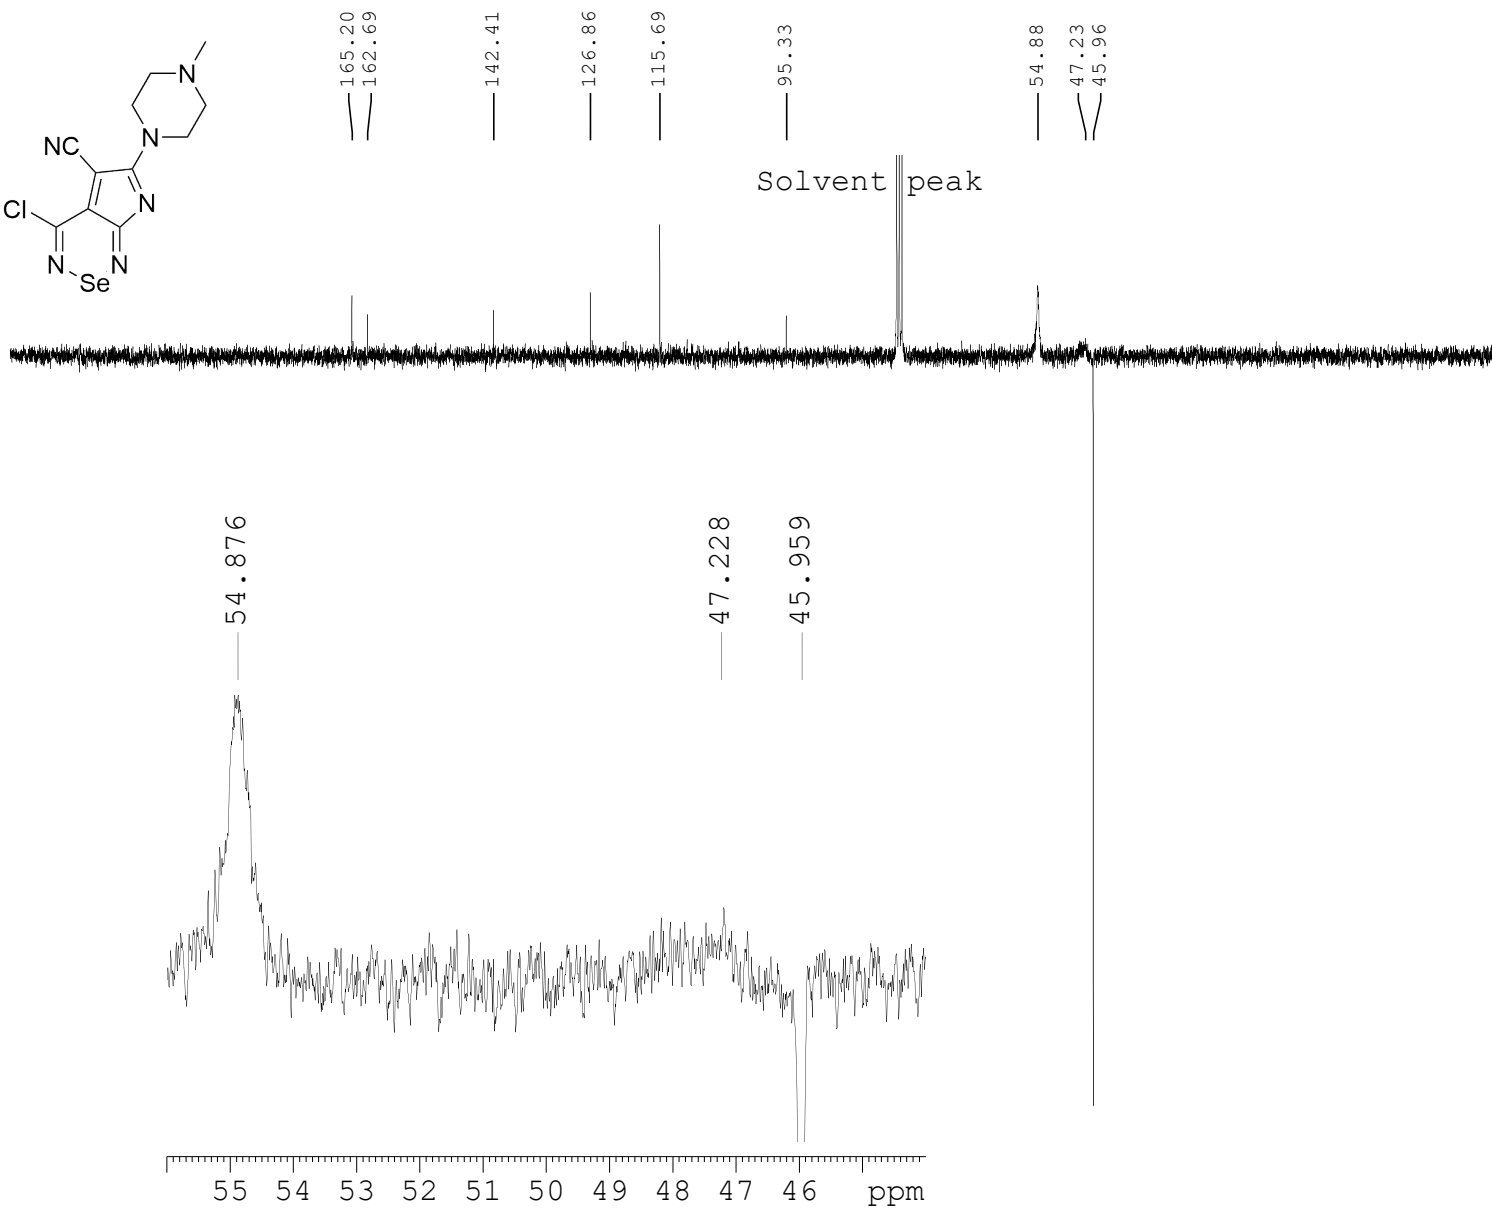

Current Data Parameters  
 NAME NMR 300  
 EXPNO 192  
 PROCNO 1

F2 - Acquisition Parameters

Date\_ 20230424  
 Time\_ 8.57 h  
 INSTRUM spect  
 PROBHD z104275\_0375 (  
 PULPROG jmod  
 TD 65536  
 SOLVENT CDCl3  
 NS 10240  
 DS 4  
 SWH 18115.941 Hz  
 FIDRES 0.552855 Hz  
 AQ 1.8087935 sec  
 RG 201.81  
 DW 27.600 usec  
 DE 6.50 usec  
 TE -9.5 K  
 CNST2 145.000000  
 CNST11 1.000000  
 D1 2.0000000 sec  
 D20 0.00689655 sec  
 TD0 1  
 SFO1 75.4752953 MHz  
 NUC1 13C  
 P1 10.00 usec  
 P2 20.00 usec  
 PLW1 45.0000000 W  
 SFO2 300.1312005 MHz  
 NUC2 1H  
 CPDPRG[2] waltz65  
 PCPD2 90.00 usec  
 PLW2 7.09999990 W  
 PLW12 0.17180000 W

F2 - Processing parameters

SI 32768  
 SF 75.4677388 MHz  
 WDW EM  
 SSB 0  
 LB 1.00 Hz  
 GB 0  
 PC 1.40

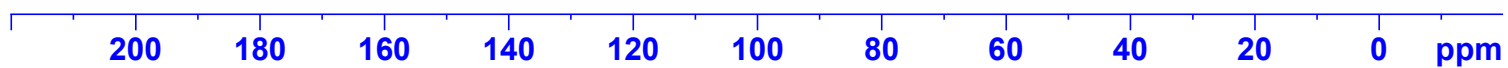





4-Chloro-6-morpholinopyrrolo[2,3-c][1,2,6]selenadiazine-5-carbonitrile 26

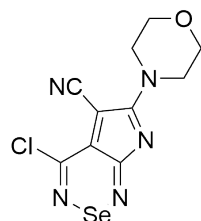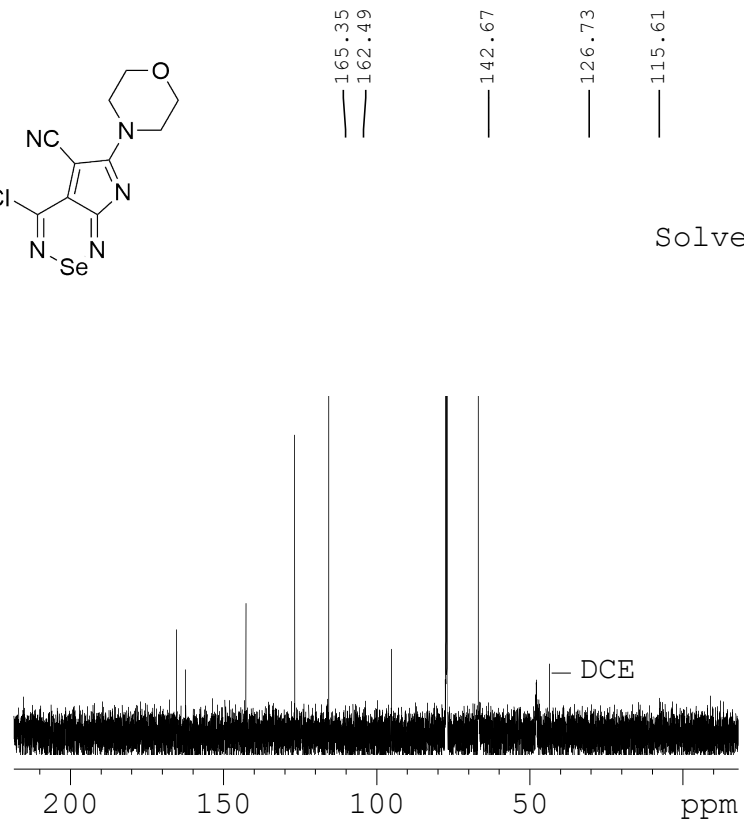

165.35  
162.49  
142.67  
126.73  
115.61  
95.10  
77.41  
77.15  
76.90  
66.79  
47.73  
43.57

Solvent peak

DCE

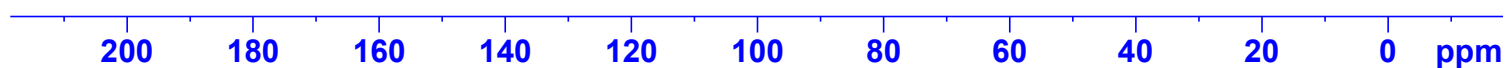

Current Data Parameters  
NAME nmr 500  
EXPNO 43  
PROCNO 1

F2 - Acquisition Parameters

Date\_ 20230320  
Time\_ 9.04 h  
INSTRUM spect  
PROBHD z113652\_0078 (  
PULPROG jmod  
TD 65536  
SOLVENT CDCl3  
NS 13312  
DS 4  
SWH 29761.904 Hz  
FIDRES 0.908261 Hz  
AQ 1.1010048 sec  
RG 2050  
DW 16.800 usec  
DE 6.50 usec  
TE 299.0 K  
CNST2 145.000000  
CNST11 1.000000  
D1 2.0000000 sec  
D20 0.00689655 sec  
TD0 1  
SFO1 125.7459712 MHz  
NUC1 13C  
P1 10.00 usec  
P2 20.00 usec  
PLW1 121.3600061 W  
SFO2 500.0350001 MHz  
NUC2 1H  
CPDPRG[2] waltz65  
PCPD2 80.00 usec  
PLW2 16.34900093 W  
PLW12 0.34647381 W

F2 - Processing parameters

SI 32768  
SF 125.7333803 MHz  
WDW EM  
SSB 0  
LB 1.00 Hz  
GB 0  
PC 1.40

4-Chloro-6-thiomorpholinopyrrolo[2,3-c][1,2,6]selenadiazine-5-carbonitrile 27

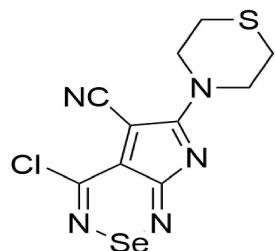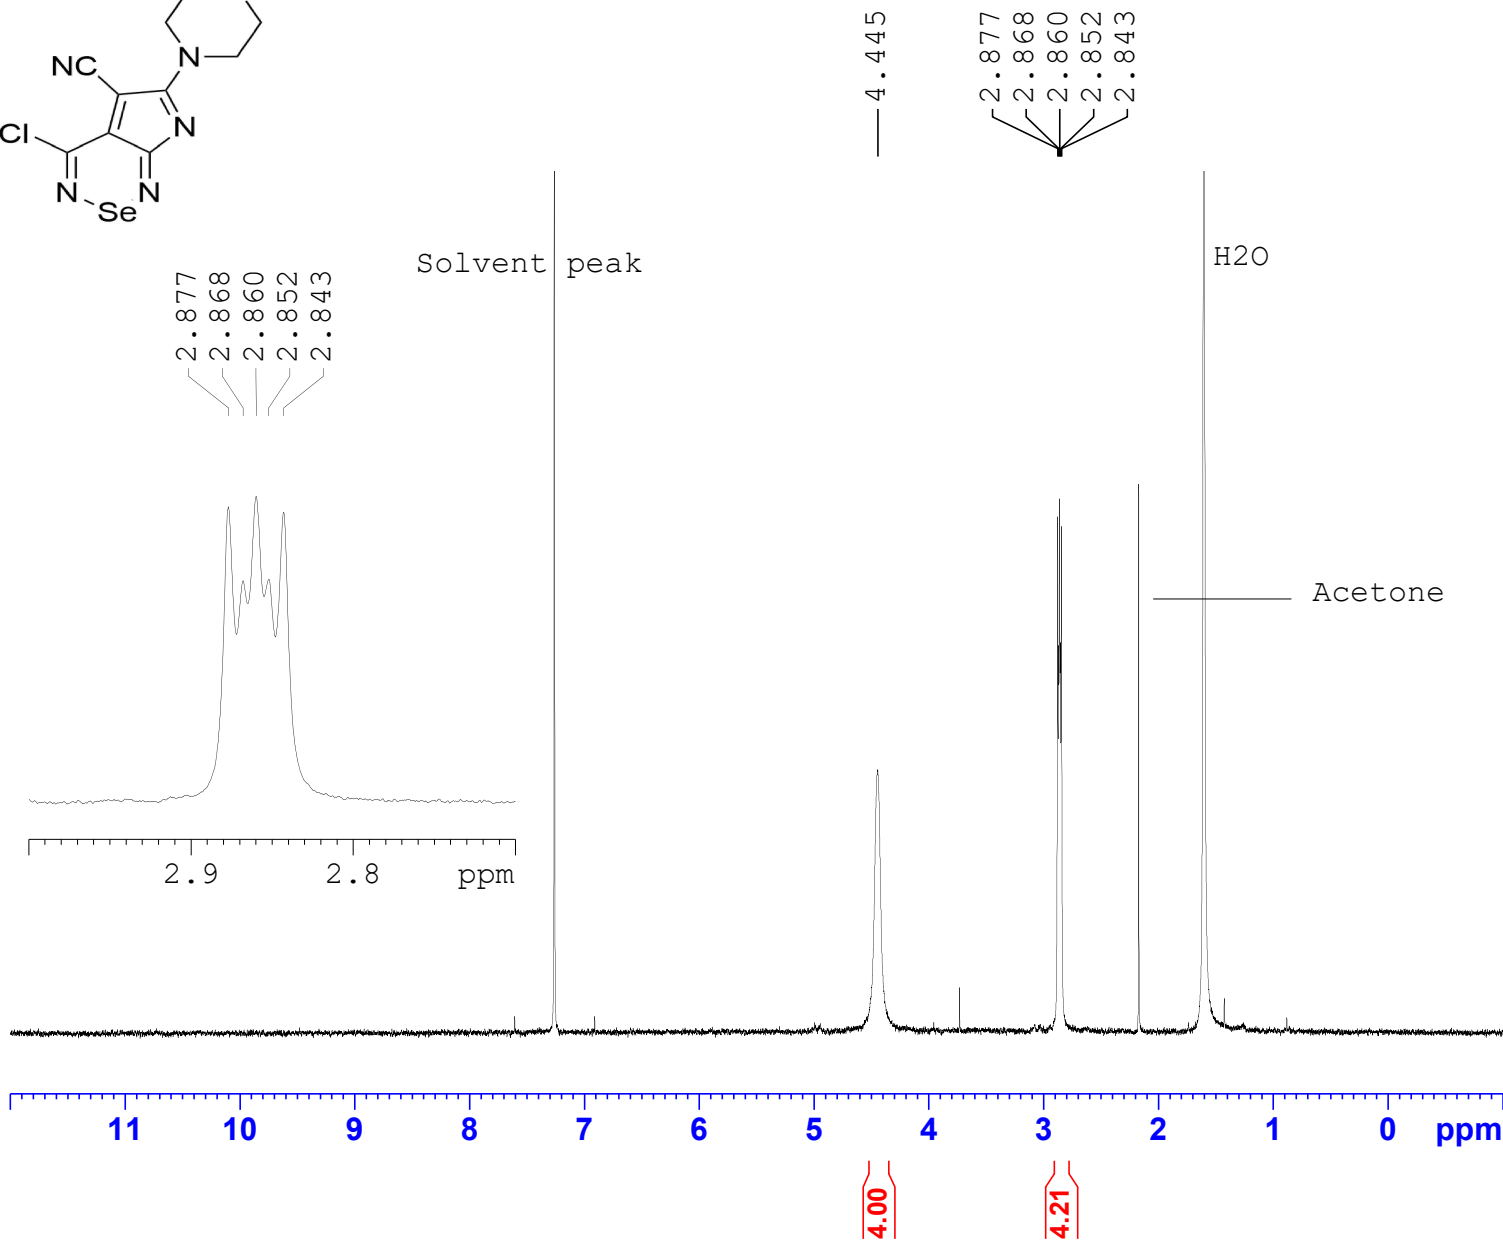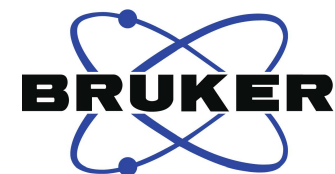

Current Data Parameters  
 NAME NMR 300  
 EXPNO 139  
 PROCNO 1

F2 - Acquisition Parameters  
 Date\_ 20221121  
 Time\_ 11.37 h  
 INSTRUM spect  
 PROBHD z104275\_0375 ( )  
 PULPROG zg30  
 TD 65536  
 SOLVENT CDCl3  
 NS 16  
 DS 2  
 SWH 6009.615 Hz  
 FIDRES 0.183399 Hz  
 AQ 5.4525952 sec  
 RG 201.81  
 DW 83.200 usec  
 DE 6.50 usec  
 TE 298.0 K  
 D1 1.00000000 sec  
 TD0 1  
 SFO1 300.1318533 MHz  
 NUC1 1H  
 P1 14.00 usec  
 PLW1 7.85570002 W

F2 - Processing parameters  
 SI 65536  
 SF 300.1300073 MHz  
 WDW EM  
 SSB 0  
 LB 0.30 Hz  
 GB 0  
 PC 1.00

4-Chloro-6-thiomorpholinopyrrolo[2,3-c][1,2,6]selenadiazine-5-carbonitrile 27

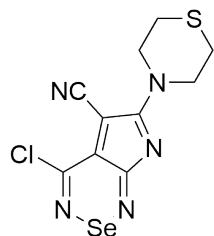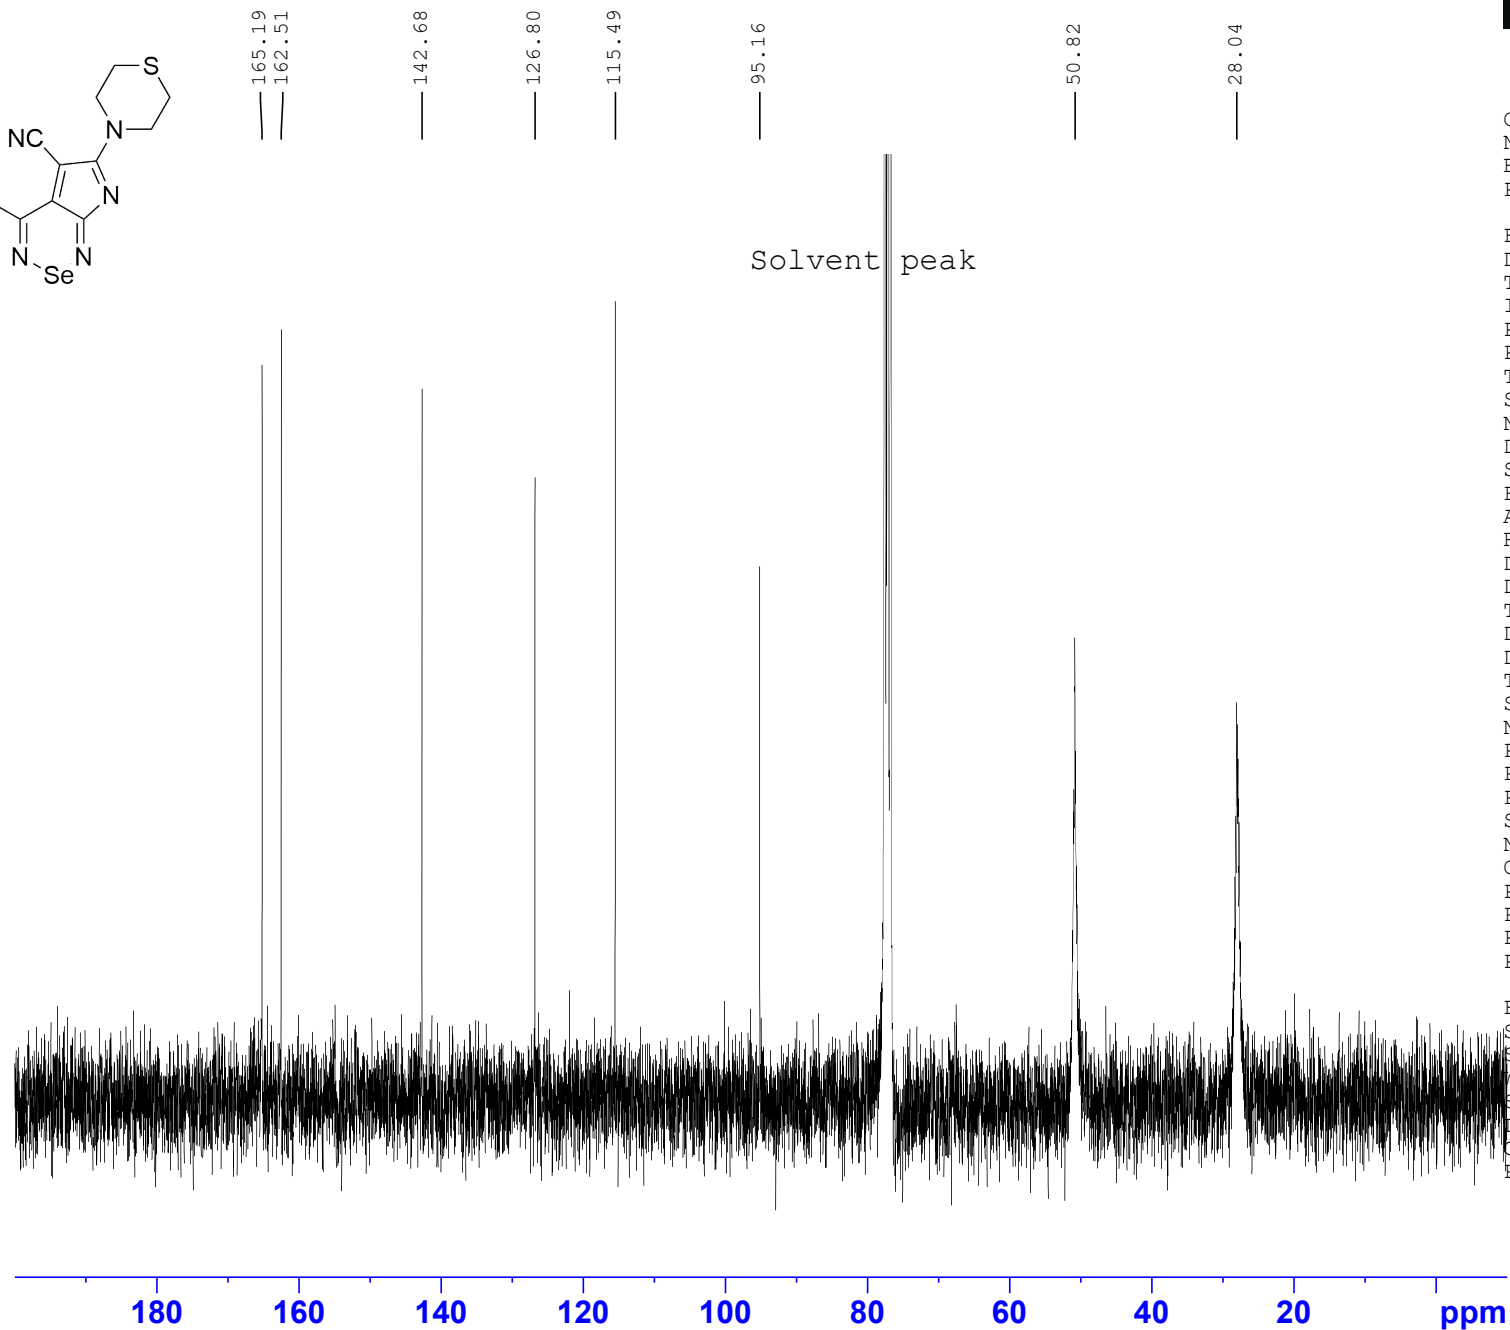

Current Data Parameters  
 NAME NMR 300  
 EXPNO 185  
 PROCNO 1

F2 - Acquisition Parameters  
 Date\_ 20230316  
 Time\_ 9.29 h  
 INSTRUM spect  
 PROBHD z104275\_0375 (  
 PULPROG zgpg30  
 TD 65536  
 SOLVENT CDCl3  
 NS 12288  
 DS 4  
 SWH 18115.941 Hz  
 FIDRES 0.552855 Hz  
 AQ 1.8087935 sec  
 RG 20.09  
 DW 27.600 usec  
 DE 6.50 usec  
 TE -9.5 K  
 D1 2.0000000 sec  
 D11 0.03000000 sec  
 TD0 1  
 SFO1 75.4752953 MHz  
 NUC1 13C  
 P0 3.33 usec  
 P1 10.00 usec  
 PLW1 45.00000000 W  
 SFO2 300.1312005 MHz  
 NUC2 1H  
 CPDPRG[2] waltz65  
 PCPD2 90.00 usec  
 PLW2 7.09999990 W  
 PLW12 0.17180000 W  
 PLW13 0.08641500 W

F2 - Processing parameters  
 SI 32768  
 SF 75.4677393 MHz  
 WDW EM  
 SSB 0  
 LB 1.00 Hz  
 GB 0  
 PC 1.40

4-Chloro-6-(2-methylpiperidin-1-yl)pyrrolo[2,3-c][1,2,6]selenadiazine-5-carbonitrile 28

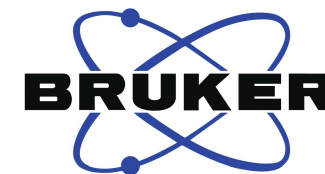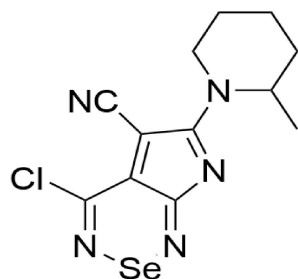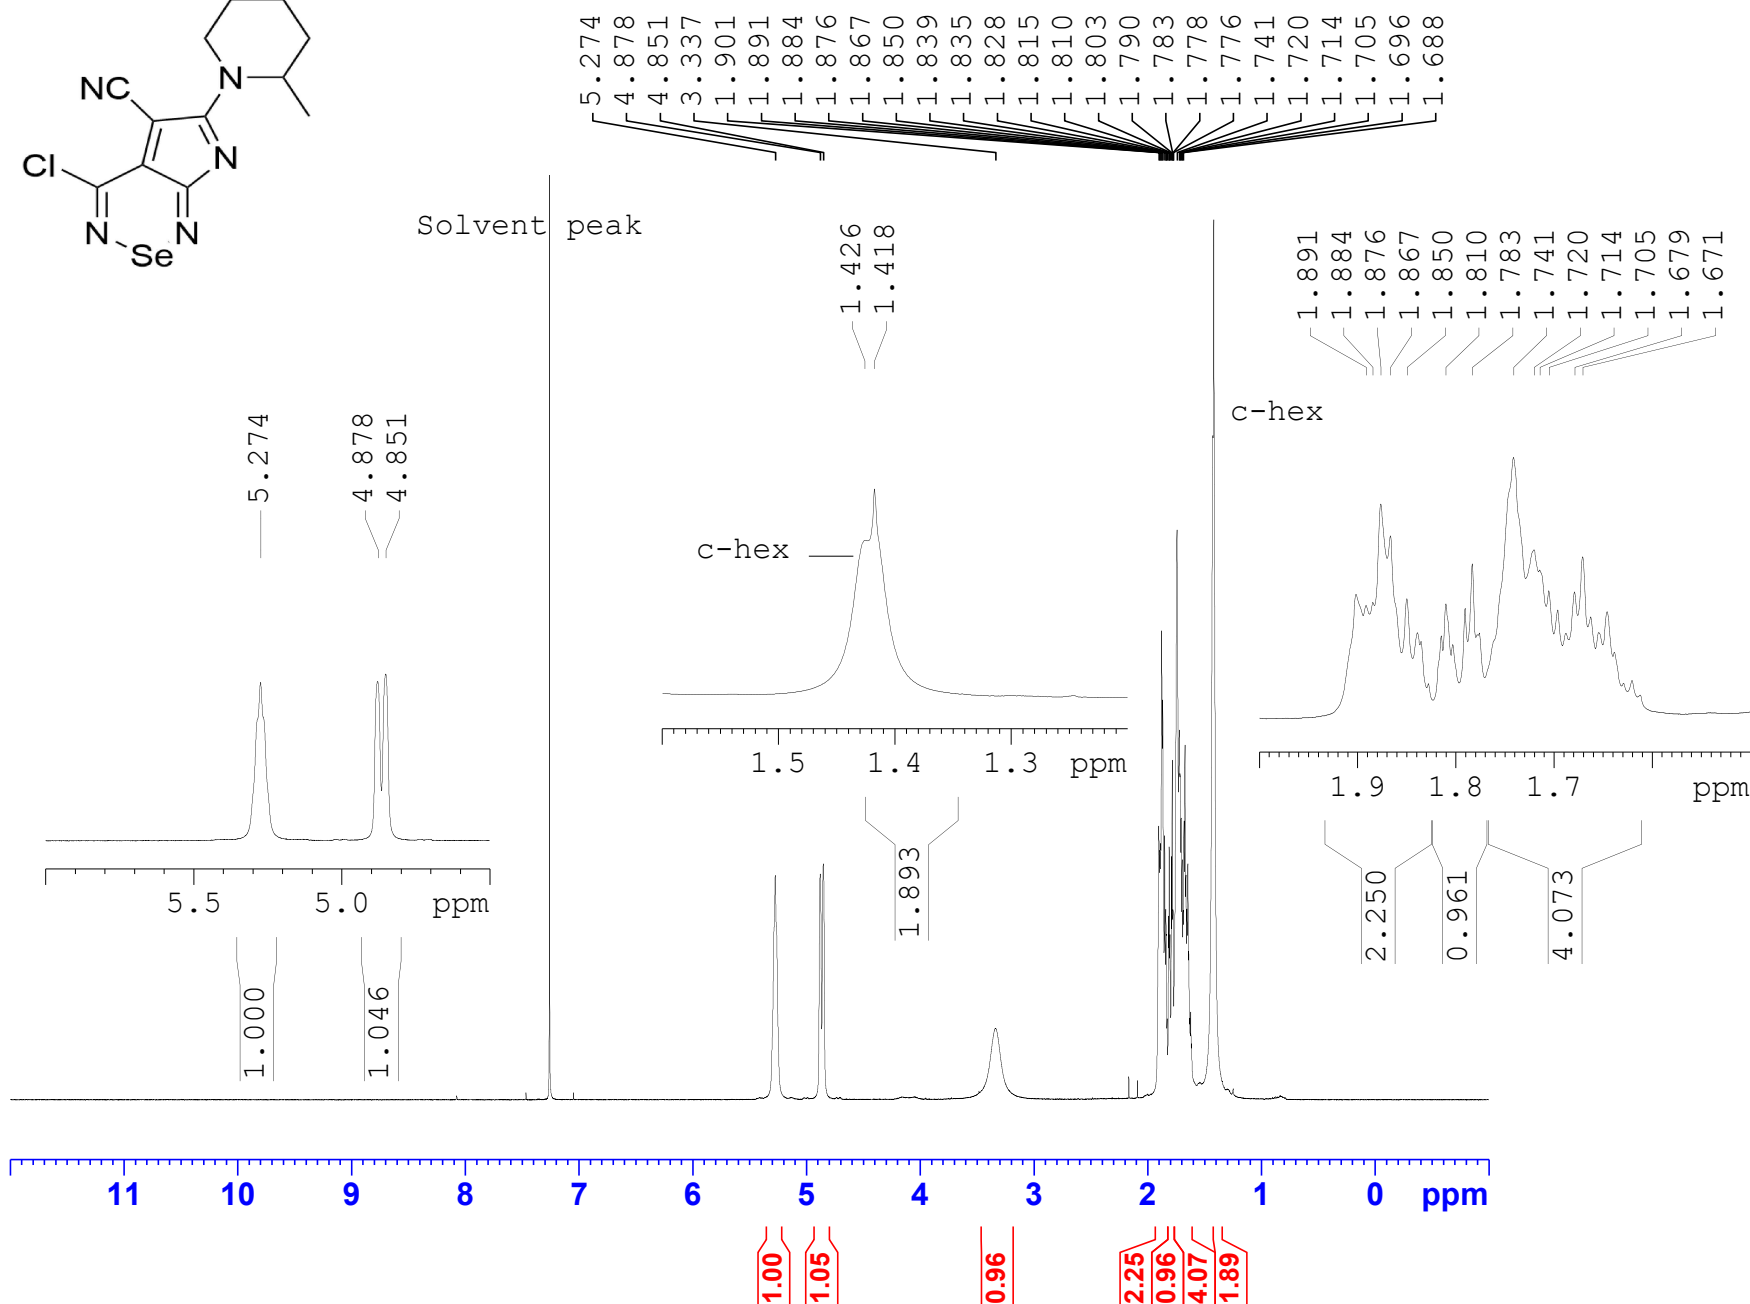

Current Data Parameters  
 NAME nmr 500  
 EXPNO 122  
 PROCNO 1

F2 - Acquisition Parameters  
 Date\_ 20230730  
 Time\_ 23.28 h  
 INSTRUM spect  
 PROBHD z113652\_0078 (  
 PULPROG zg30  
 TD 65536  
 SOLVENT CDCl3  
 NS 16  
 DS 2  
 SWH 10000.000 Hz  
 FIDRES 0.305176 Hz  
 AQ 3.2767999 sec  
 RG 144  
 DW 50.000 usec  
 DE 13.55 usec  
 TE 299.3 K  
 D1 1.00000000 sec  
 TD0 1  
 SFO1 500.0360877 MHz  
 NUC1 1H  
 P0 4.00 usec  
 P1 12.00 usec  
 PLW1 16.34900093 W

F2 - Processing parameters  
 SI 65536  
 SF 500.0330125 MHz  
 WDW EM  
 SSB 0  
 LB 0.30 Hz  
 GB 0  
 PC 1.00

4-Chloro-6-(2-methylpiperidin-1-yl)pyrrolo[2,3-c][1,2,6]selenadiazine-5-carbonitrile 28

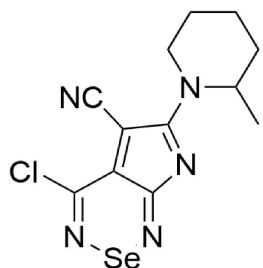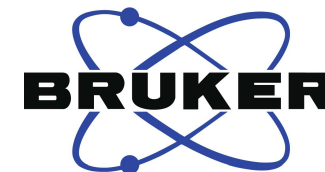

Current Data Parameters  
 NAME nmr 500  
 EXPNO 123  
 PROCNO 1

F2 - Acquisition Parameters  
 Date\_ 20230731  
 Time\_ 8.30 h  
 INSTRUM spect  
 PROBHD z113652\_0078 (  
 PULPROG zgpg30  
 TD 65536  
 SOLVENT CDCl3  
 NS 10240  
 DS 4  
 SWH 29761.904 Hz  
 FIDRES 0.908261 Hz  
 AQ 1.1010048 sec  
 RG 2050  
 DW 16.800 usec  
 DE 6.50 usec  
 TE 301.5 K  
 D1 2.0000000 sec  
 D11 0.03000000 sec  
 TD0 1  
 SFO1 125.7459712 MHz  
 NUC1 13C  
 P0 3.33 usec  
 P1 10.00 usec  
 PLW1 121.36000061 W  
 SFO2 500.0350001 MHz  
 NUC2 1H  
 CPDPRG[2] waltz65  
 PCPD2 80.00 usec  
 PLW2 16.34900093 W  
 PLW12 0.34647381 W  
 PLW13 0.17365260 W

F2 - Processing parameters  
 SI 32768  
 SF 125.7333809 MHz  
 WDW EM  
 SSB 0  
 LB 1.00 Hz  
 GB 0  
 PC 1.40

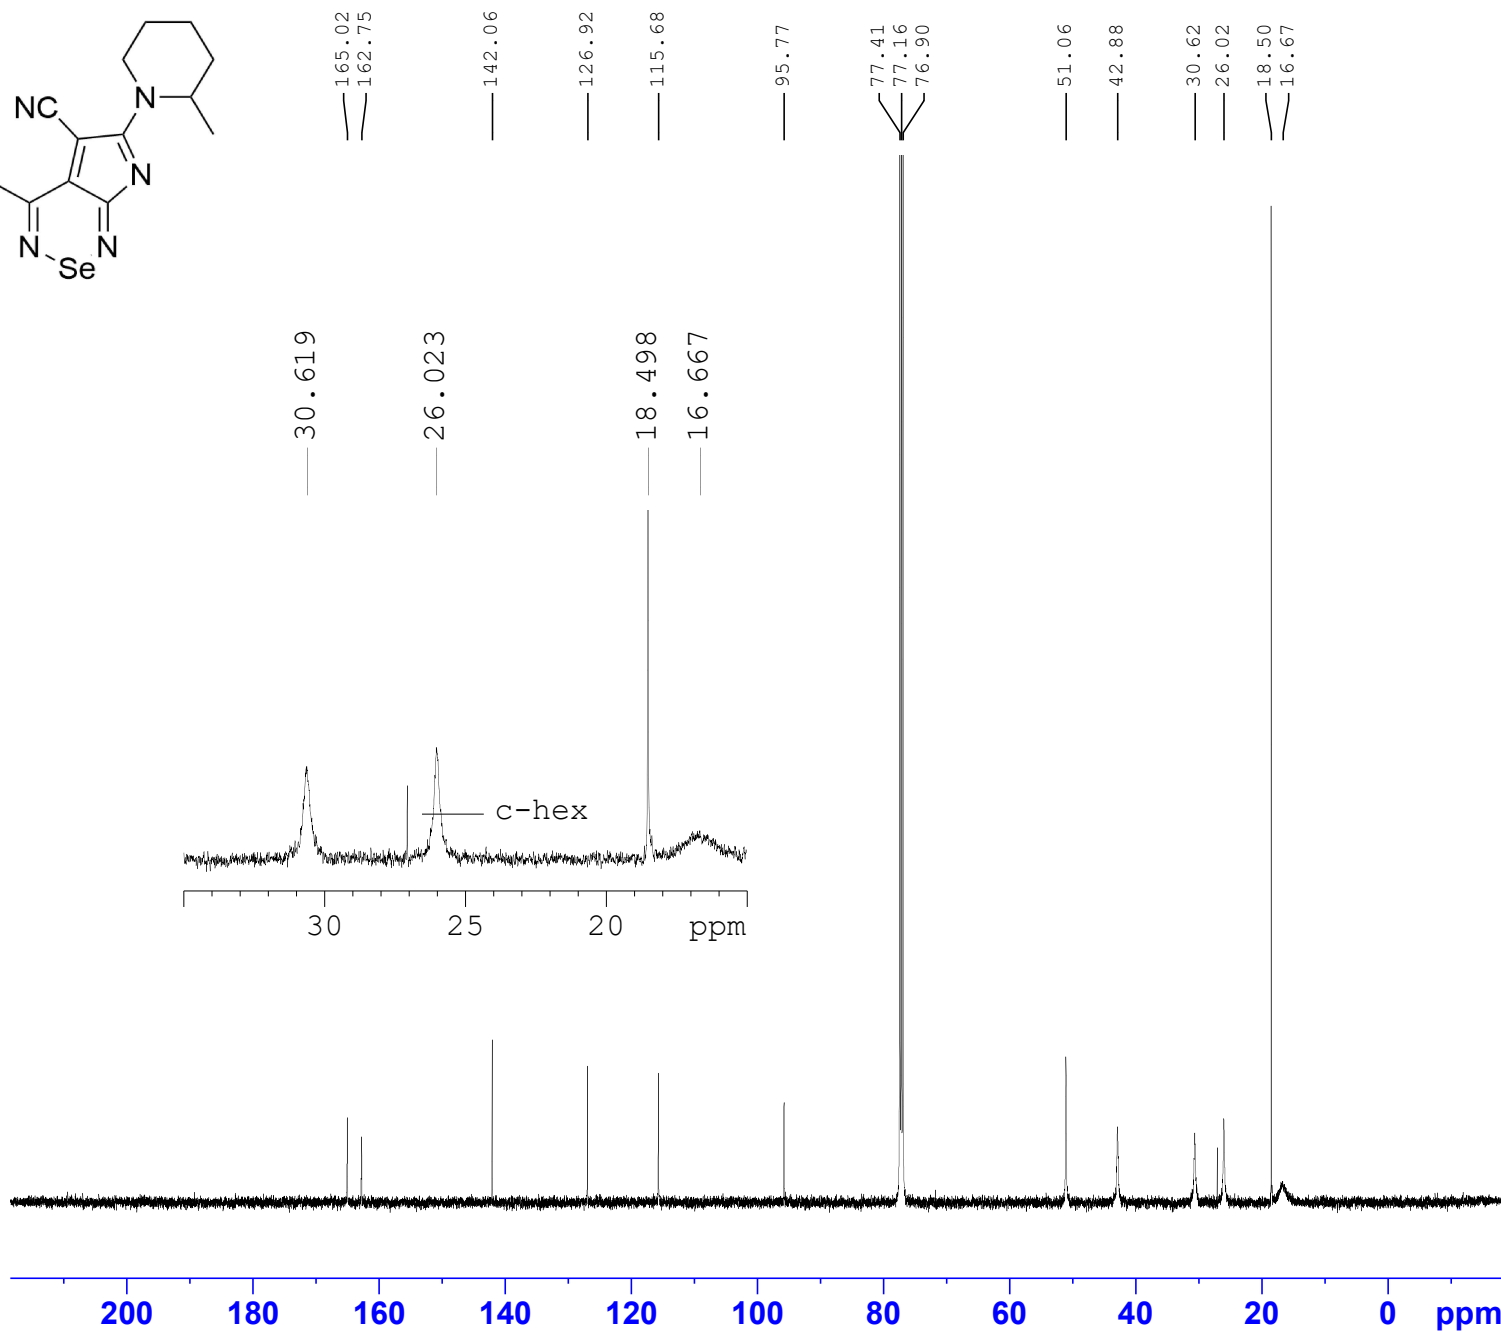

6-(Azepan-1-yl)-4-chloropyrrolo[2,3-c][1,2,6]selenadiazine-5-carbonitrile 29

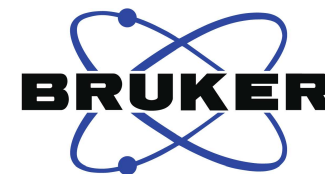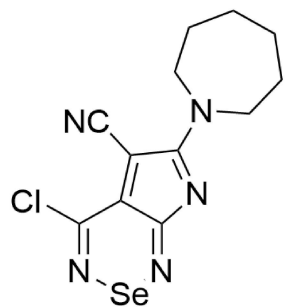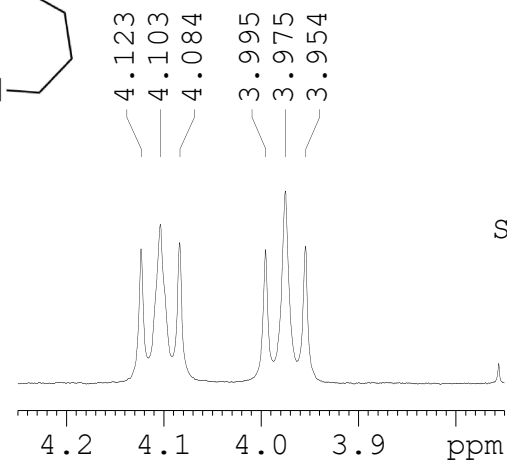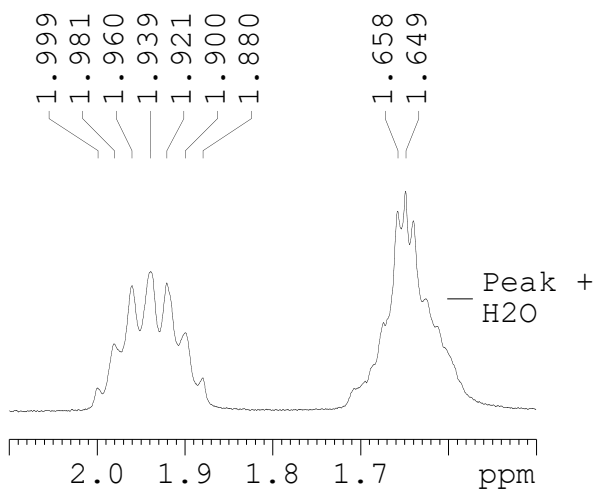

4.123  
4.103  
4.084  
3.995  
3.975  
3.954  
1.999  
1.981  
1.960  
1.939  
1.921  
1.900  
1.880  
1.658  
1.649

Solvent peak

c-hex

Current Data Parameters  
NAME NMR 300  
EXPNO 137  
PROCNO 1

F2 - Acquisition Parameters  
Date\_ 20221117  
Time\_ 18.50 h  
INSTRUM spect  
PROBHD Z104275\_0375 ( )  
PULPROG zg30  
TD 65536  
SOLVENT CD2Cl2  
NS 16  
DS 2  
SWH 6009.615 Hz  
FIDRES 0.183399 Hz  
AQ 5.4525952 sec  
RG 201.81  
DW 83.200 usec  
DE 6.50 usec  
TE 298.0 K  
D1 1.00000000 sec  
TD0 1  
SFO1 300.1318533 MHz  
NUC1 1H  
P1 14.00 usec  
PLW1 7.85570002 W

F2 - Processing parameters  
SI 65536  
SF 300.1300115 MHz  
WDW EM  
SSB 0  
LB 0.30 Hz  
GB 0  
PC 1.00

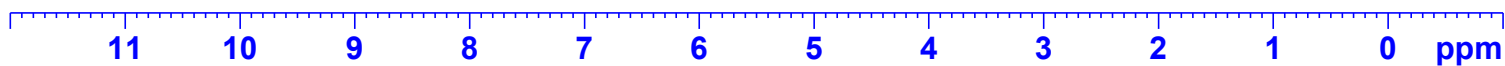

2.04  
2.00

4.00  
3.83

6-(Azepan-1-yl)-4-chloropyrrolo[2,3-c][1,2,6]selenadiazine-5-carbonitrile 29

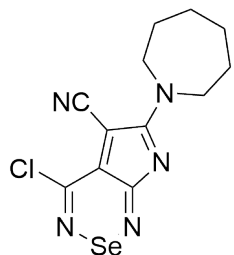

Current Data Parameters  
 NAME nmr 500  
 EXPNO 41  
 PROCNO 1

F2 - Acquisition Parameters

Date\_ 20230319  
 Time\_ 21.09 h  
 INSTRUM spect  
 PROBHD Z113652\_0078 (  
 PULPROG jmod  
 TD 65536  
 SOLVENT CDCl3  
 NS 9216  
 DS 4  
 SWH 29761.904 Hz  
 FIDRES 0.908261 Hz  
 AQ 1.1010048 sec  
 RG 2050  
 DW 16.800 usec  
 DE 6.50 usec  
 TE 296.7 K  
 CNST2 145.000000  
 CNST11 1.0000000  
 D1 2.0000000 sec  
 D20 0.00689655 sec  
 TD0 1  
 SFO1 125.7459712 MHz  
 NUC1 13C  
 P1 10.00 usec  
 P2 20.00 usec  
 PLW1 121.3600061 W  
 SFO2 500.0350001 MHz  
 NUC2 1H  
 CPDPRG[2] waltz65  
 PCPD2 80.00 usec  
 PLW2 16.34900093 W  
 PLW12 0.34647381 W

F2 - Processing parameters

SI 32768  
 SF 125.7333831 MHz  
 WDW EM  
 SSB 0  
 LB 1.00 Hz  
 GB 0  
 PC 1.40

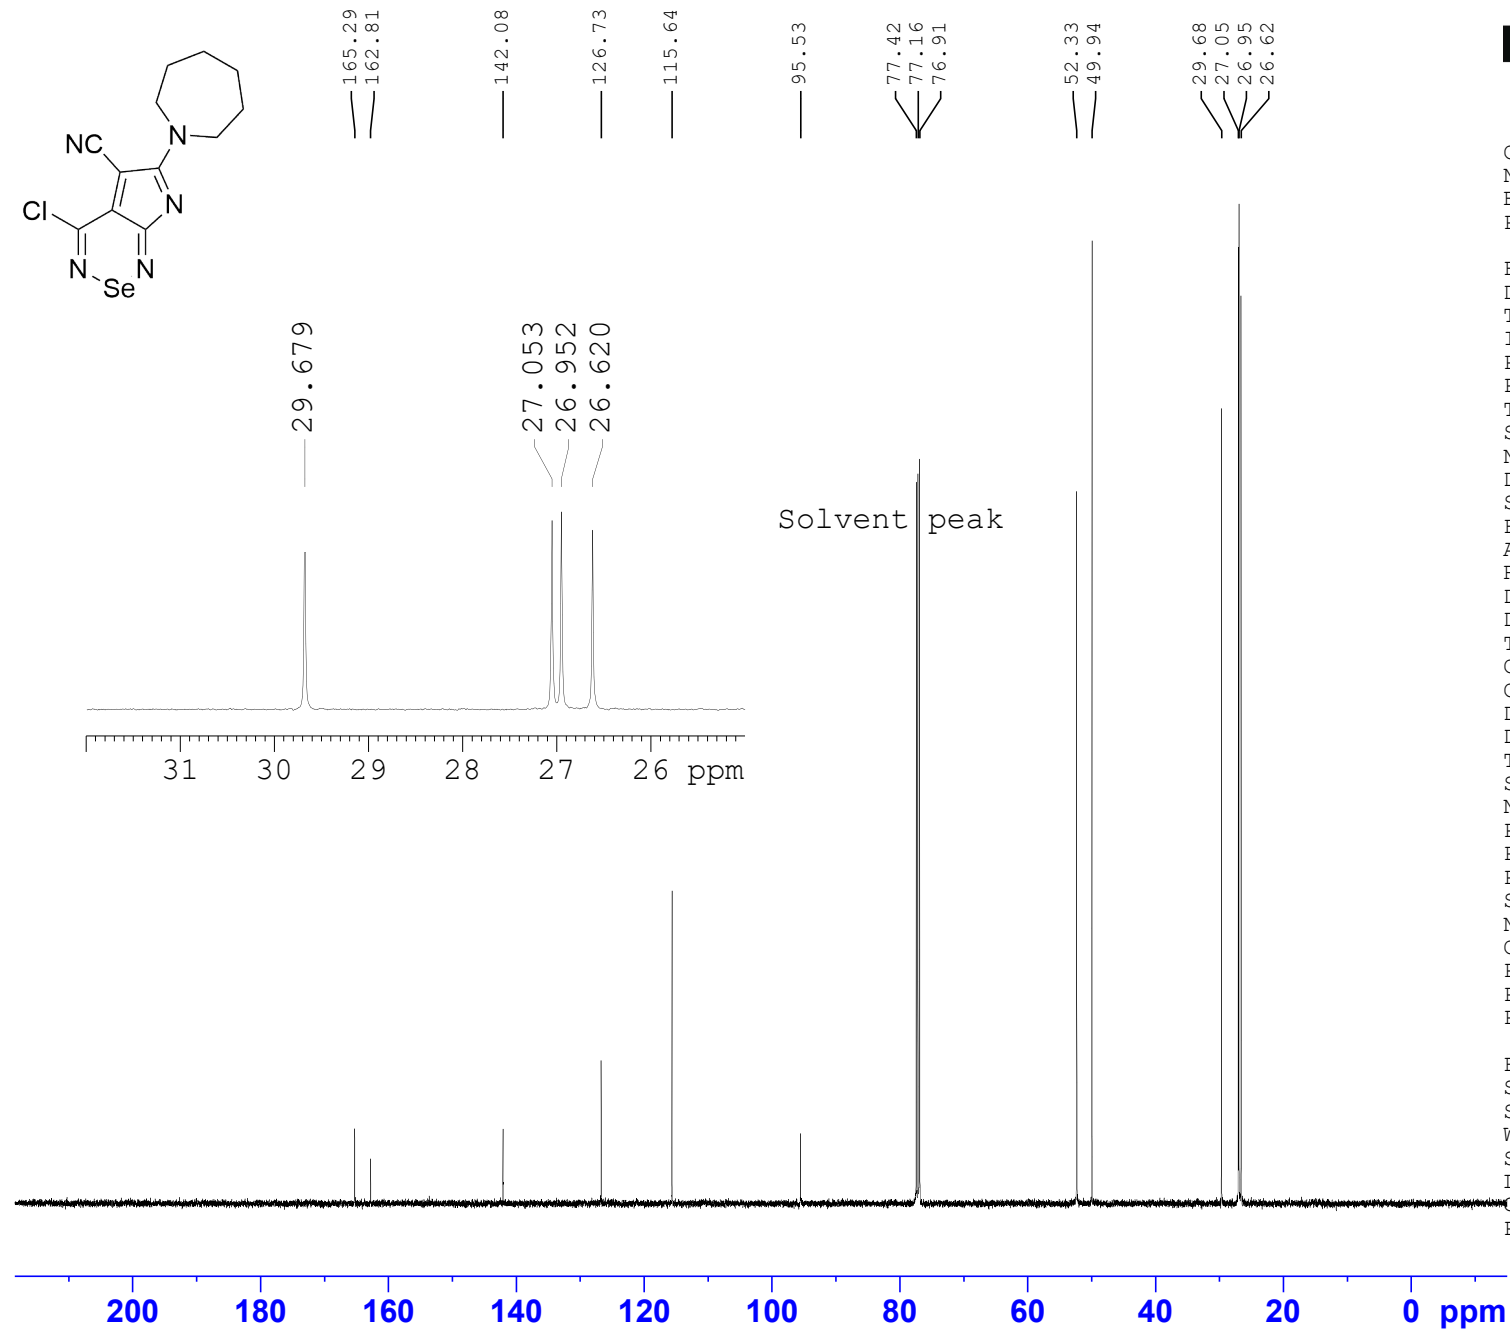



4-Chloro-6-(dibenzylamino)pyrrolo[2,3-c][1,2,6]selenadiazine-5-carbonitrile 30

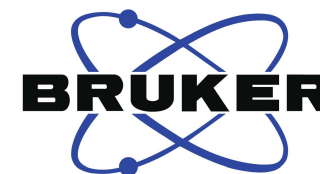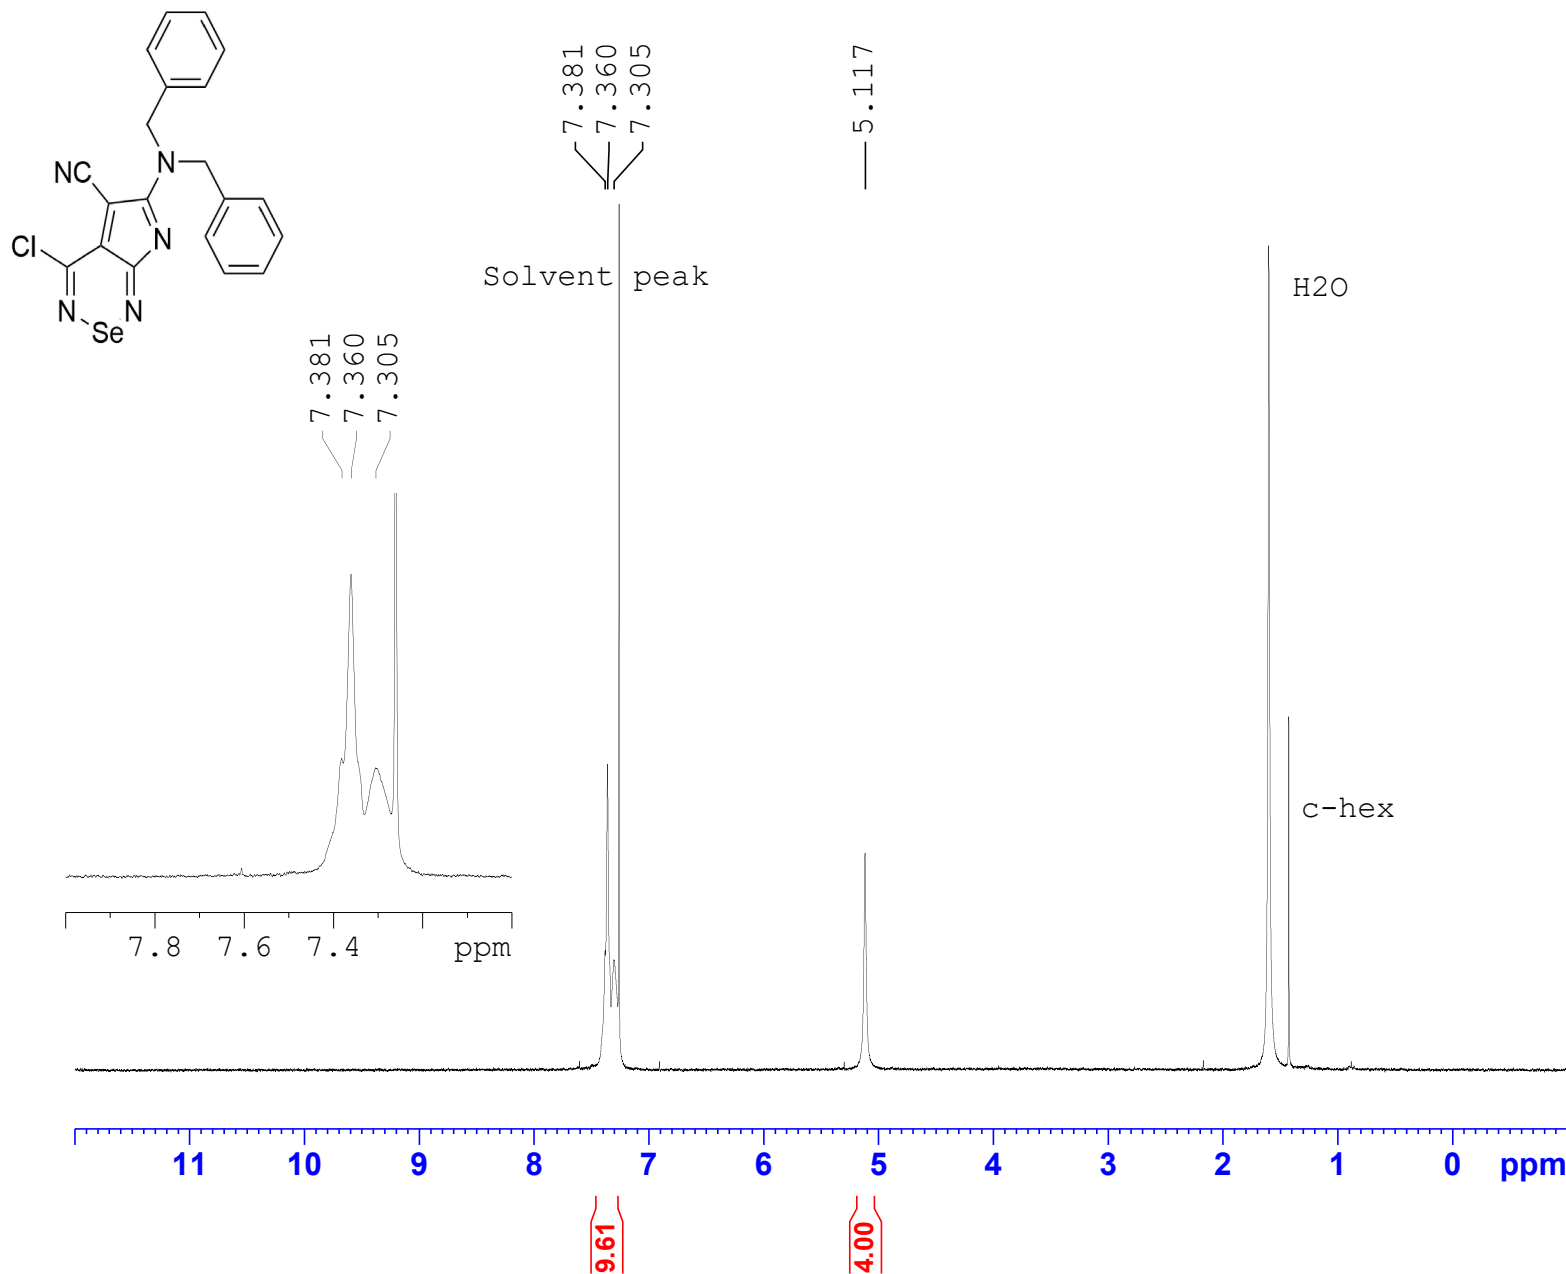

Current Data Parameters  
 NAME NMR 300  
 EXPNO 103  
 PROCNO 1

F2 - Acquisition Parameters  
 Date\_ 20221025  
 Time\_ 16.50 h  
 INSTRUM spect  
 PROBHD z104275\_0375 ( )  
 PULPROG zg30  
 TD 65536  
 SOLVENT CDC13  
 NS 16  
 DS 2  
 SWH 6009.615 Hz  
 FIDRES 0.183399 Hz  
 AQ 5.4525952 sec  
 RG 201.81  
 DW 83.200 usec  
 DE 6.50 usec  
 TE 298.0 K  
 D1 1.00000000 sec  
 TD0 1  
 SFO1 300.1318533 MHz  
 NUC1 1H  
 P1 14.00 usec  
 PLW1 7.85570002 W

F2 - Processing parameters  
 SI 65536  
 SF 300.1300073 MHz  
 WDW EM  
 SSB 0  
 LB 0.30 Hz  
 GB 0  
 PC 1.00

4-Chloro-6-(dibenzylamino)pyrrolo[2,3-c][1,2,6]selenadiazine-5-carbonitrile 30

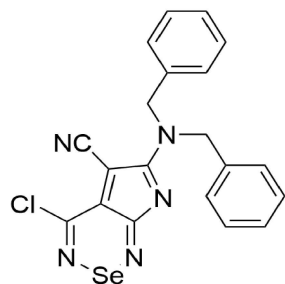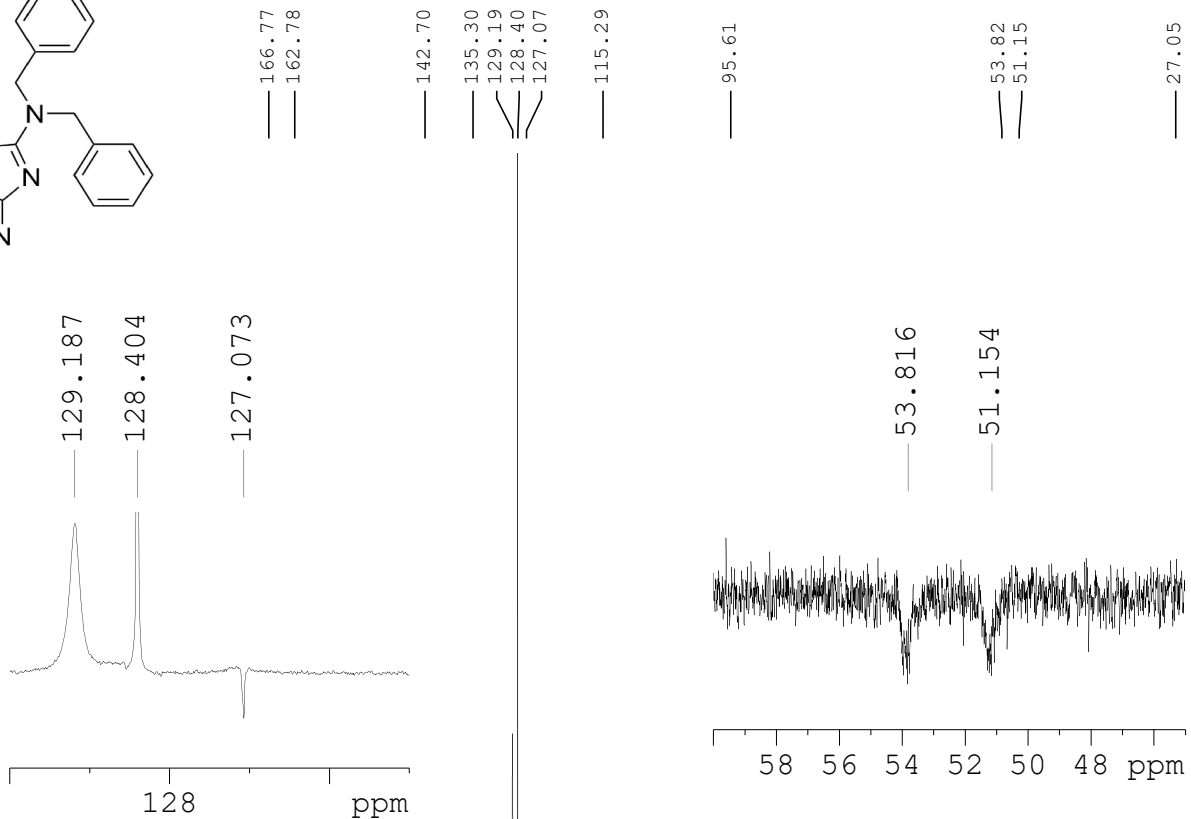

Current Data Parameters  
 NAME nmr 500  
 EXPNO 62  
 PROCNO 1

F2 - Acquisition Parameters  
 Date\_ 20230412  
 Time\_ 7.02 h  
 INSTRUM spect  
 PROBHD z113652\_0078 (  
 PULPROG jmod  
 TD 65536  
 SOLVENT CDCl3  
 NS 12288  
 DS 4  
 SWH 29761.904 Hz  
 FIDRES 0.908261 Hz  
 AQ 1.1010048 sec  
 RG 2050  
 DW 16.800 usec  
 DE 6.50 usec  
 TE 300.5 K  
 CNST2 145.000000  
 CNST11 1.0000000  
 D1 2.0000000 sec  
 D20 0.00689655 sec  
 TD0 1  
 SFO1 125.7459712 MHz  
 NUC1 13C  
 P1 10.00 usec  
 P2 20.00 usec  
 PLW1 121.3600061 W  
 SFO2 500.0350001 MHz  
 NUC2 1H  
 CPDPRG[2] waltz65  
 PCPD2 80.00 usec  
 PLW2 16.34900093 W  
 PLW12 0.34647381 W

F2 - Processing parameters  
 SI 32768  
 SF 125.7333820 MHz  
 WDW EM  
 SSB 0  
 LB 1.00 Hz  
 GB 0  
 PC 1.40

Solvent peak

c-hex

200 180 160 140 120 100 80 60 40 20 ppm

4-Chloro-6-[methyl (phenyl) amino]pyrrolo[2,3-c][1,2,6]selenadiazine-5-carbonitrile 31

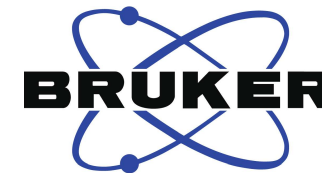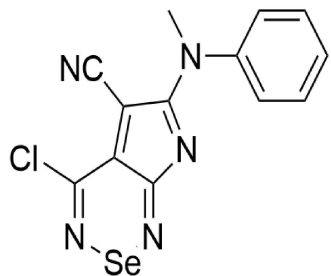

7.554  
7.547  
7.542  
7.537  
7.532  
7.400  
7.397  
7.388  
7.382  
7.376  
7.368

3.762

Solvent peak

H2O

7.554  
7.547  
7.542  
7.537  
7.532  
7.400  
7.388  
7.382  
7.376  
7.368

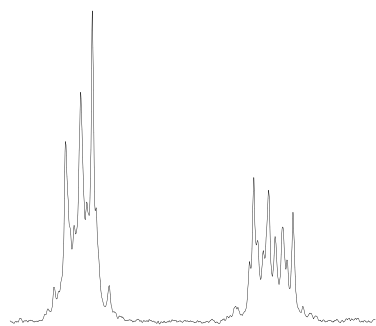

7.5 7.4 ppm

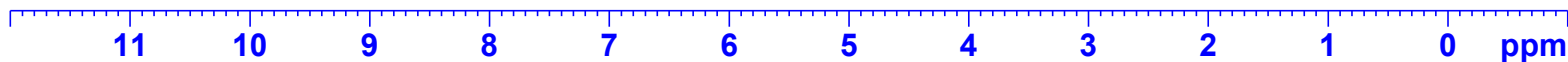

3.09  
2.10

3.00

Current Data Parameters  
NAME NMR 300  
EXPNO 159  
PROCNO 1

F2 - Acquisition Parameters  
Date\_ 20230124  
Time\_ 17.17 h  
INSTRUM spect  
PROBHD z104275\_0375 (   
PULPROG zg30  
TD 65536  
SOLVENT CDCl3  
NS 16  
DS 2  
SWH 6009.615 Hz  
FIDRES 0.183399 Hz  
AQ 5.4525952 sec  
RG 201.81  
DW 83.200 usec  
DE 6.50 usec  
TE 295.7 K  
D1 1.00000000 sec  
TD0 1  
SFO1 300.1318533 MHz  
NUC1 1H  
P1 14.00 usec  
PLW1 7.85570002 W

F2 - Processing parameters  
SI 65536  
SF 300.1300000 MHz  
WDW EM  
SSB 0  
LB 0.30 Hz  
GB 0  
PC 1.00

4-Chloro-6-[methyl (phenyl) amino]pyrrolo[2,3-c][1,2,6]selenadiazine-5-carbonitrile 31

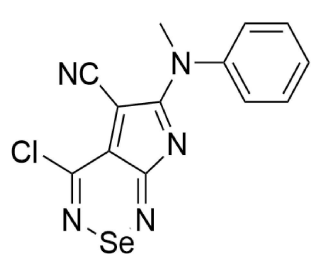

166.26  
162.95  
142.74  
142.40  
130.32  
129.82  
127.36  
125.90  
112.05  
97.87  
77.29  
77.04  
76.78  
43.46  
42.69

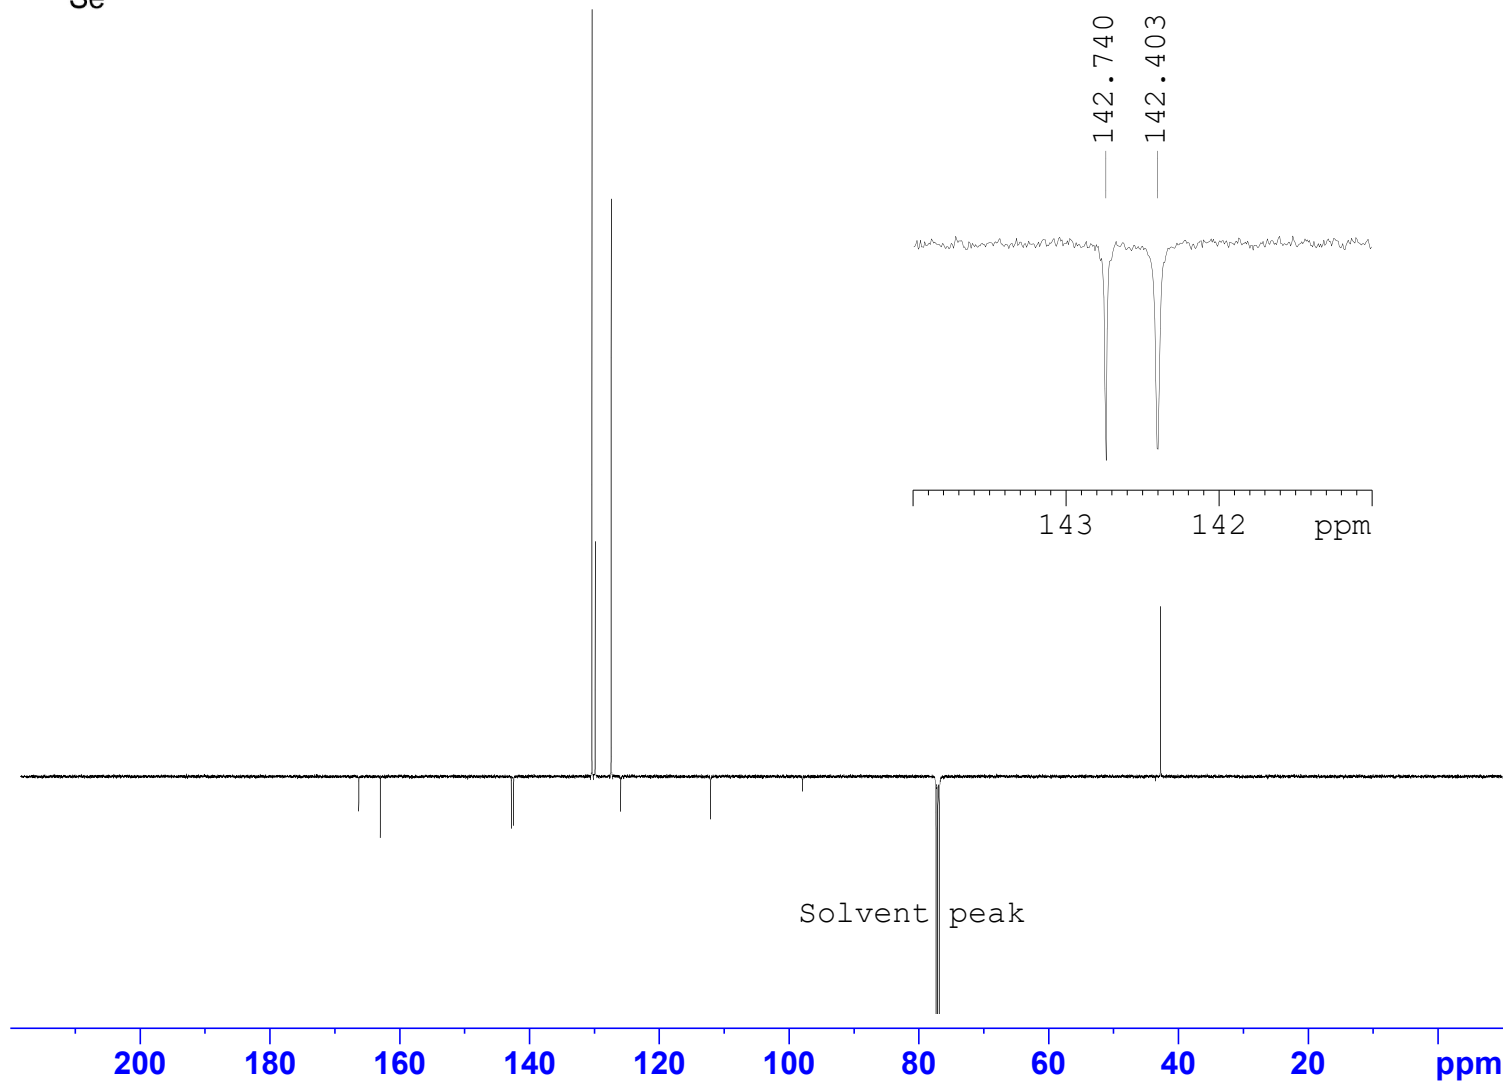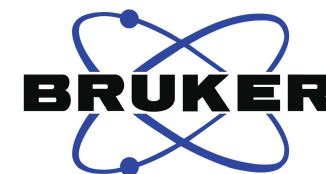

Current Data Parameters  
NAME nmr 500  
EXPNO 24  
PROCNO 1

F2 - Acquisition Parameters  
Date\_ 20230201  
Time\_ 8.19 h  
INSTRUM spect  
PROBHD z113652\_0078 (  
PULPROG jmod  
TD 65536  
SOLVENT CDC13  
NS 6144  
DS 4  
SWH 29761.904 Hz  
FIDRES 0.908261 Hz  
AQ 1.1010048 sec  
RG 2050  
DW 16.800 usec  
DE 6.50 usec  
TE 298.2 K  
CNST2 145.0000000  
CNST11 1.0000000  
D1 6.00000000 sec  
D20 0.00689655 sec  
TD0 1  
SFO1 125.7459712 MHz  
NUC1 13C  
P1 10.00 usec  
P2 20.00 usec  
PLW1 121.36000061 W  
SFO2 500.0350001 MHz  
NUC2 1H  
CPDPRG[2] waltz65  
PCPD2 80.00 usec  
PLW2 16.34900093 W  
PLW12 0.34647381 W

F2 - Processing parameters  
SI 32768  
SF 125.7333979 MHz  
WDW EM  
SSB 0  
LB 1.00 Hz  
GB 0  
PC 1.40

4-Chloro-6-(diphenylamino)pyrrolo[2,3-c][1,2,6]selenadiazine-5-carbonitrile 32

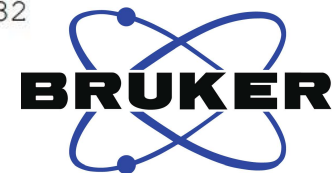

Current Data Parameters  
 NAME NMR 300  
 EXPNO 174  
 PROCNO 1

F2 - Acquisition Parameters  
 Date\_ 20230227  
 Time\_ 15.31 h  
 INSTRUM spect  
 PROBHD z104275\_0375 (  
 PULPROG zg30  
 TD 65536  
 SOLVENT CDCl3  
 NS 16  
 DS 2  
 SWH 6009.615 Hz  
 FIDRES 0.183399 Hz  
 AQ 5.4525952 sec  
 RG 201.81  
 DW 83.200 usec  
 DE 13.19 usec  
 TE 294.3 K  
 D1 1.00000000 sec  
 TD0 1  
 SFO1 300.1318533 MHz  
 NUC1 1H  
 P0 4.67 usec  
 P1 14.00 usec  
 PLW1 7.09999990 W

F2 - Processing parameters  
 SI 65536  
 SF 300.1300073 MHz  
 WDW EM  
 SSB 0  
 LB 0.30 Hz  
 GB 0  
 PC 1.00

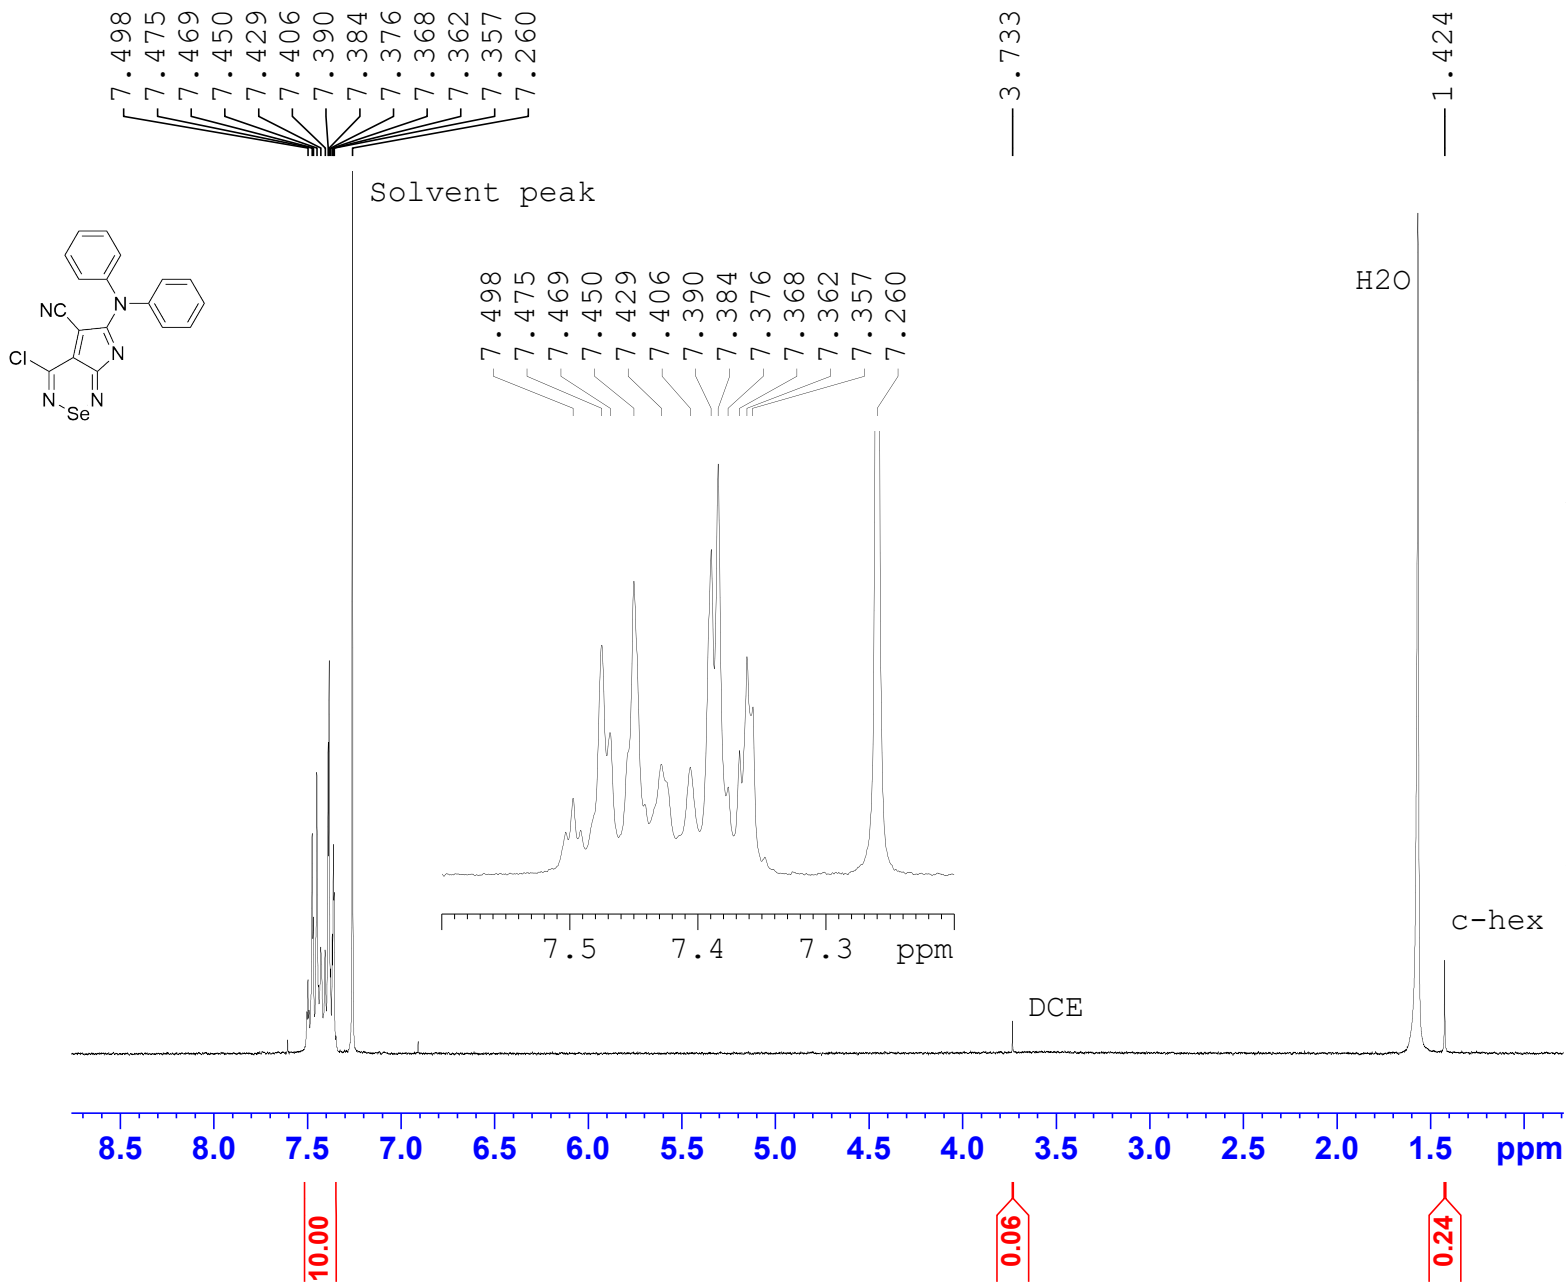

4-Chloro-6-(diphenylamino)pyrrolo[2,3-c][1,2,6]selenadiazine-5-carbonitrile 32

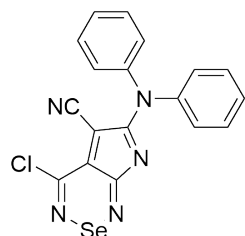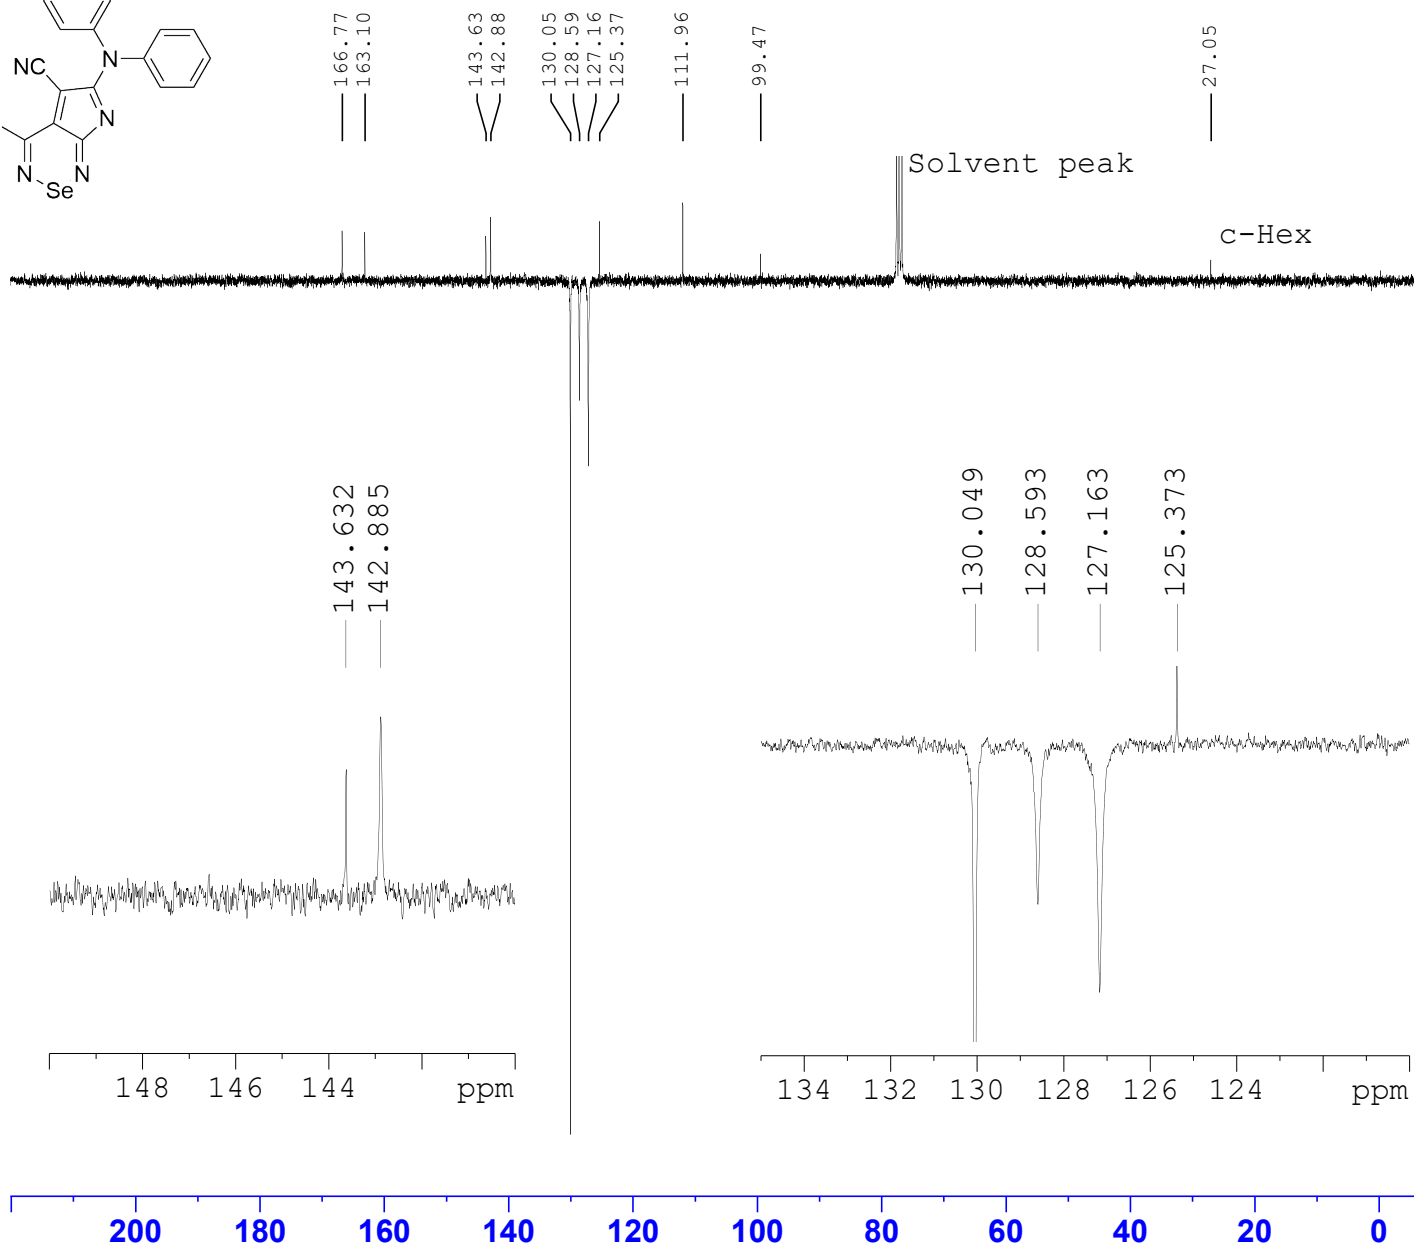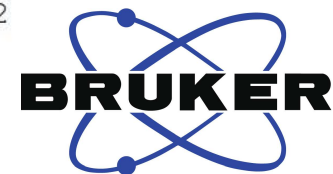

Current Data Parameters  
 NAME NMR 300  
 EXPNO 175  
 PROCNO 1

F2 - Acquisition Parameters  
 Date\_ 20230228  
 Time\_ 5.25 h  
 INSTRUM spect  
 PROBHD Z104275\_0375 (  
 PULPROG jmod  
 TD 65536  
 SOLVENT CDCl3  
 NS 6144  
 DS 4  
 SWH 18115.941 Hz  
 FIDRES 0.552855 Hz  
 AQ 1.8087935 sec  
 RG 201.81  
 DW 27.600 usec  
 DE 6.50 usec  
 TE 295.3 K  
 CNST2 145.000000  
 CNST11 1.000000  
 D1 6.0000000 sec  
 D20 0.00689655 sec  
 TD0 1  
 SFO1 75.4752953 MHz  
 NUC1 13C  
 P1 10.00 usec  
 P2 20.00 usec  
 PLW1 45.0000000 W  
 SFO2 300.1312005 MHz  
 NUC2 1H  
 CPDPRG[2] waltz65  
 PCPD2 90.00 usec  
 PLW2 7.09999990 W  
 PLW12 0.17180000 W

F2 - Processing parameters  
 SI 32768  
 SF 75.4677396 MHz  
 WDW EM  
 SSB 0  
 LB 1.00 Hz  
 GB 0  
 PC 1.40

4,6-Dimorpholinopyrrolo[2,3-c][1,2,6]selenadiazine-5-carbonitrile 33

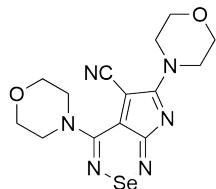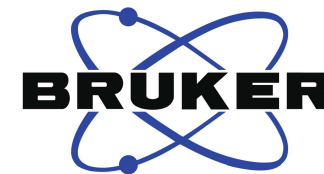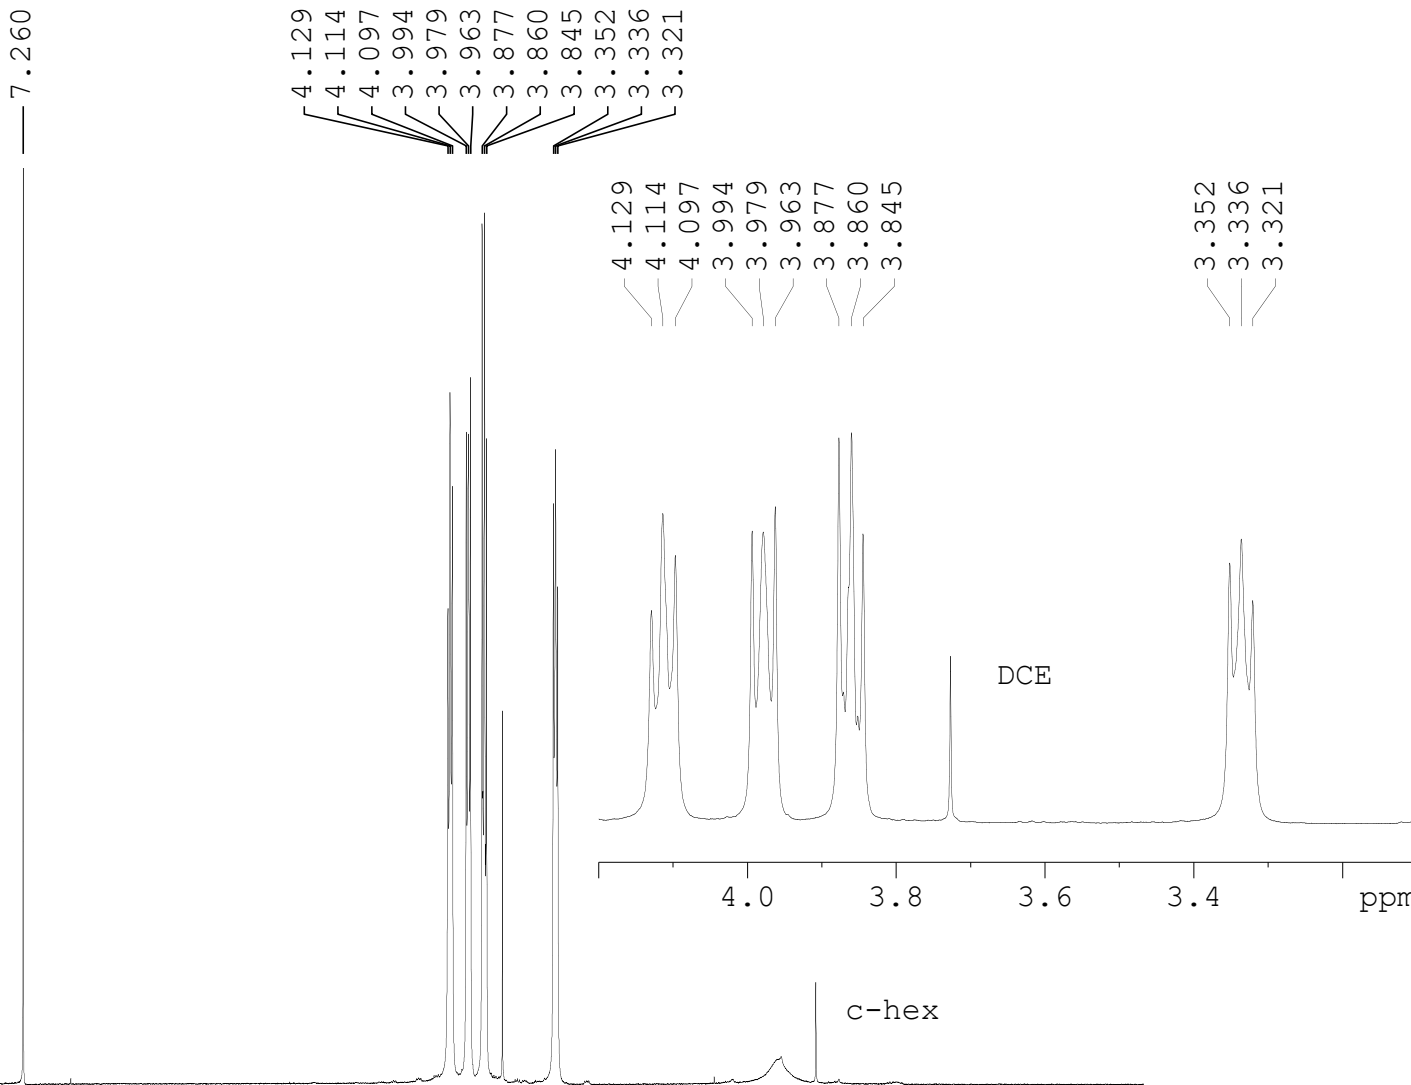

Current Data Parameters  
 NAME NMR 300  
 EXPNO 198  
 PROCNO 1

F2 - Acquisition Parameters  
 Date\_ 20230430  
 Time\_ 15.31 h  
 INSTRUM spect  
 PROBHD z104275\_0375 (zg30)  
 PULPROG zg30  
 TD 65536  
 SOLVENT CDCl3  
 NS 16  
 DS 2  
 SWH 6009.615 Hz  
 FIDRES 0.183399 Hz  
 AQ 5.4525952 sec  
 RG 201.81  
 DW 83.200 usec  
 DE 13.19 usec  
 TE 294.8 K  
 D1 1.00000000 sec  
 TD0 1  
 SFO1 300.1318533 MHz  
 NUC1 1H  
 P0 4.67 usec  
 P1 14.00 usec  
 PLW1 7.09999990 W

F2 - Processing parameters  
 SI 65536  
 SF 300.1300075 MHz  
 WDW EM  
 SSB 0  
 LB 0.30 Hz  
 GB 0  
 PC 1.00

9 8 7 6 5 4 3 2 1 0 ppm

4.00  
3.99  
4.06  
3.81

4,6-Dimorpholinopyrrolo[2,3-c][1,2,6]selenadiazine-5-carbonitrile 33

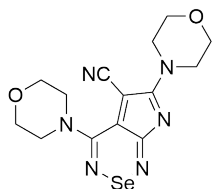

Current Data Parameters  
 NAME NMR 300  
 EXPNO 199  
 PROCNO 1

F2 - Acquisition Parameters  
 Date\_ 20230501  
 Time\_ 13.02 h  
 INSTRUM spect  
 PROBHD z104275\_0375 (  
 PULPROG jmod  
 TD 65536  
 SOLVENT CDCl3  
 NS 20000  
 DS 4  
 SWH 18115.941 Hz  
 FIDRES 0.552855 Hz  
 AQ 1.8087935 sec  
 RG 201.81  
 DW 27.600 usec  
 DE 6.50 usec  
 TE 295.5 K  
 CNST2 145.000000  
 CNST11 1.000000  
 D1 2.0000000 sec  
 D20 0.00689655 sec  
 TD0 1  
 SFO1 75.4752953 MHz  
 NUC1 13C  
 P1 10.00 usec  
 P2 20.00 usec  
 PLW1 45.0000000 W  
 SFO2 300.1312005 MHz  
 NUC2 1H  
 CPDPRG[2] waltz65  
 PCPD2 90.00 usec  
 PLW2 7.09999990 W  
 PLW12 0.17180000 W

F2 - Processing parameters  
 SI 32768  
 SF 75.4677396 MHz  
 WDW EM  
 SSB 0  
 LB 1.00 Hz  
 GB 0  
 PC 1.40

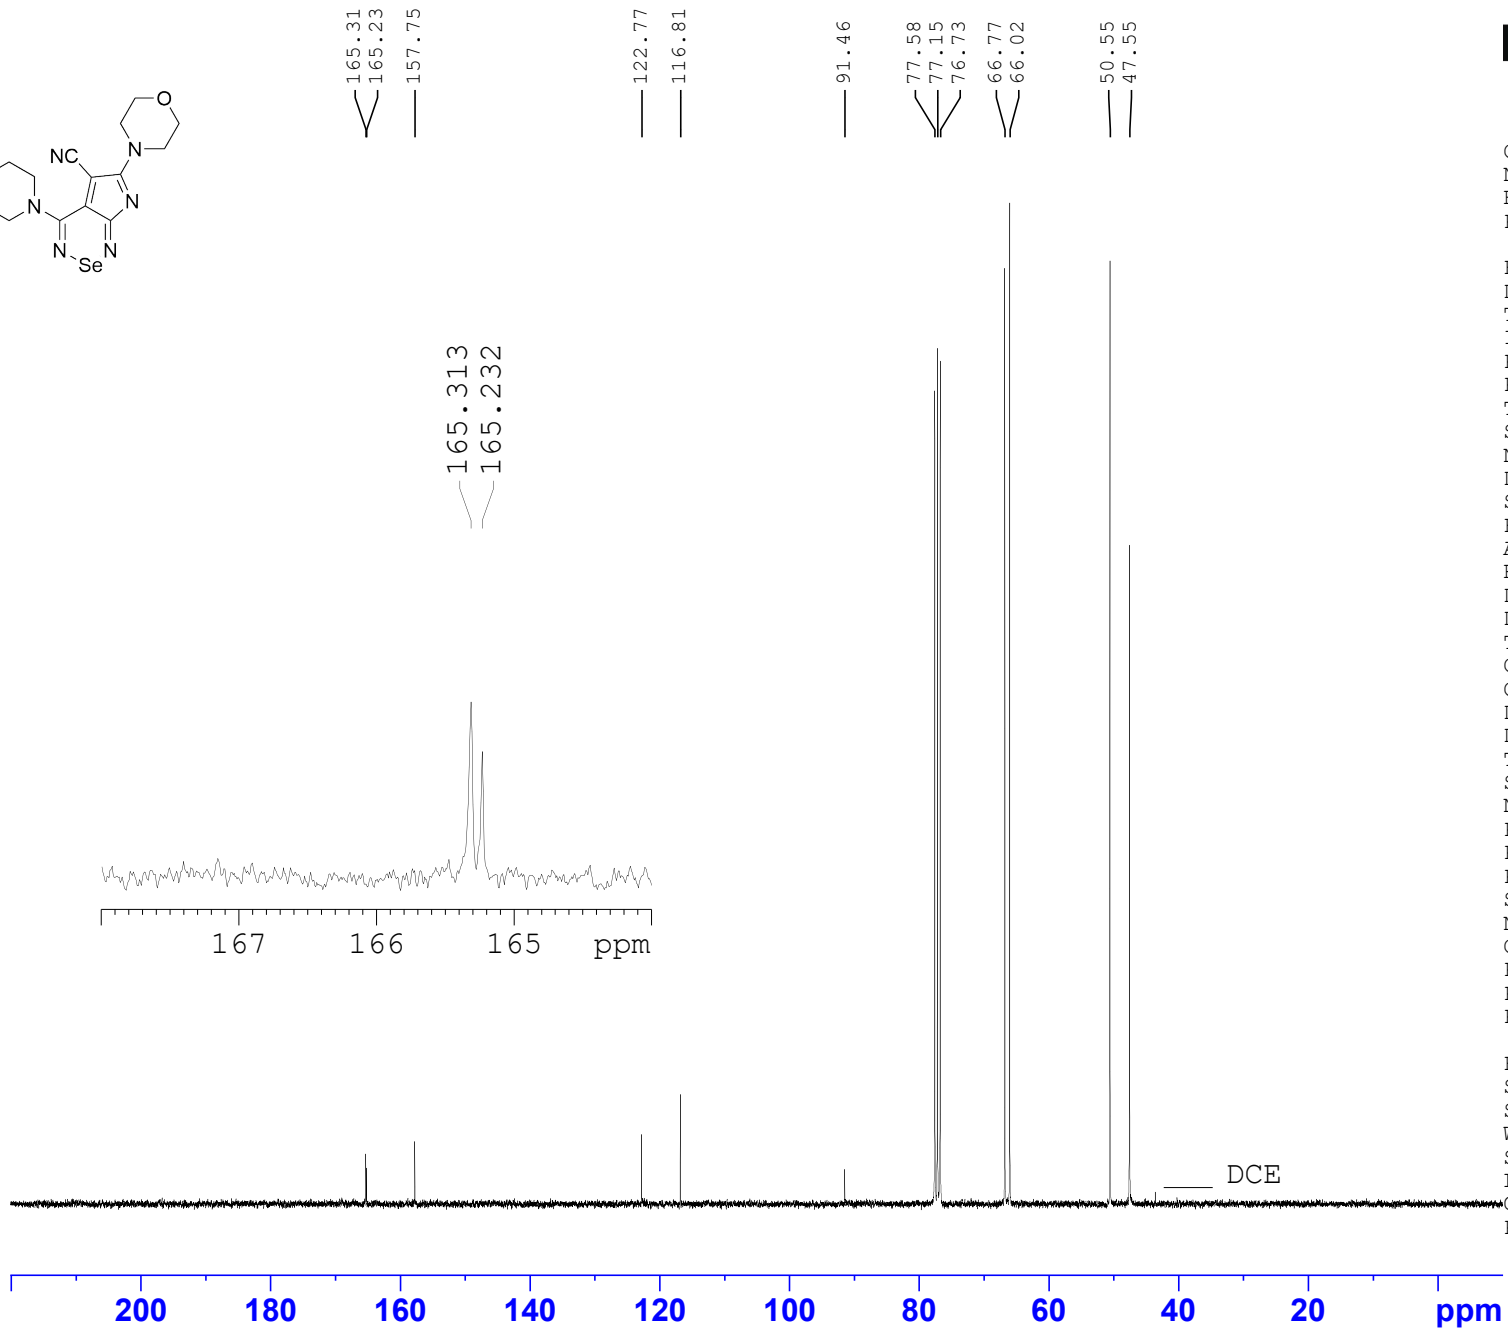



2,5-Dimorpholino-3-oxo-3H-pyrrole-4-carbonitrile 34

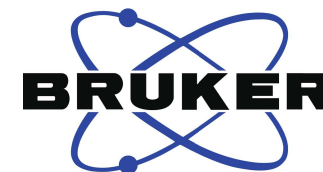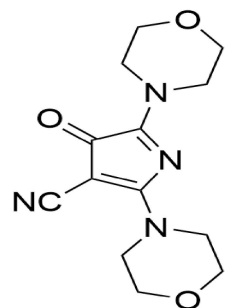

4.551  
4.535  
4.531  
4.519  
4.146  
4.131  
4.114  
4.046  
4.031  
4.026  
4.014  
3.870  
3.856  
3.849  
3.842  
3.834  
3.826  
3.815  
3.802  
3.794  
3.782  
3.778  
3.762

Solvent peak

H2O

4.535  
4.531  
4.519  
  
4.146  
4.131  
4.114  
4.046

3.856  
3.849  
3.842  
3.834  
3.826  
3.815  
3.802  
3.794  
3.782  
3.778  
3.762

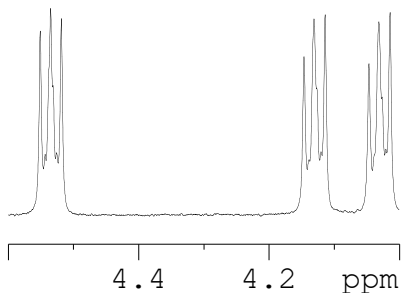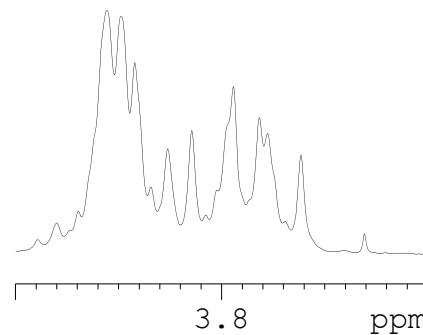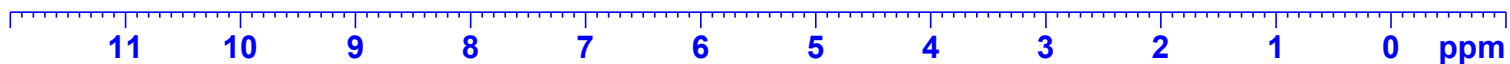

2.00  
2.01  
2.06  
10.18

Current Data Parameters  
NAME NMR 300  
EXPNO 132  
PROCNO 1

F2 - Acquisition Parameters  
Date\_ 20221113  
Time\_ 11.39 h  
INSTRUM spect  
PROBHD z104275\_0375 (  
PULPROG zg30  
TD 65536  
SOLVENT CDCl3  
NS 16  
DS 2  
SWH 6009.615 Hz  
FIDRES 0.183399 Hz  
AQ 5.4525952 sec  
RG 201.81  
DW 83.200 usec  
DE 6.50 usec  
TE 298.0 K  
D1 1.00000000 sec  
TDO 1  
SFO1 300.1318533 MHz  
NUC1 1H  
P1 14.00 usec  
PLW1 7.85570002 W

F2 - Processing parameters  
SI 65536  
SF 300.1300073 MHz  
WDW EM  
SSB 0  
LB 0.30 Hz  
GB 0  
PC 1.00

2,5-Dimorpholino-3-oxo-3H-pyrrole-4-carbonitrile 34

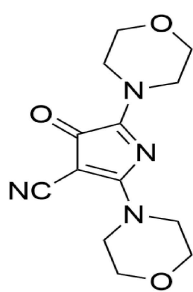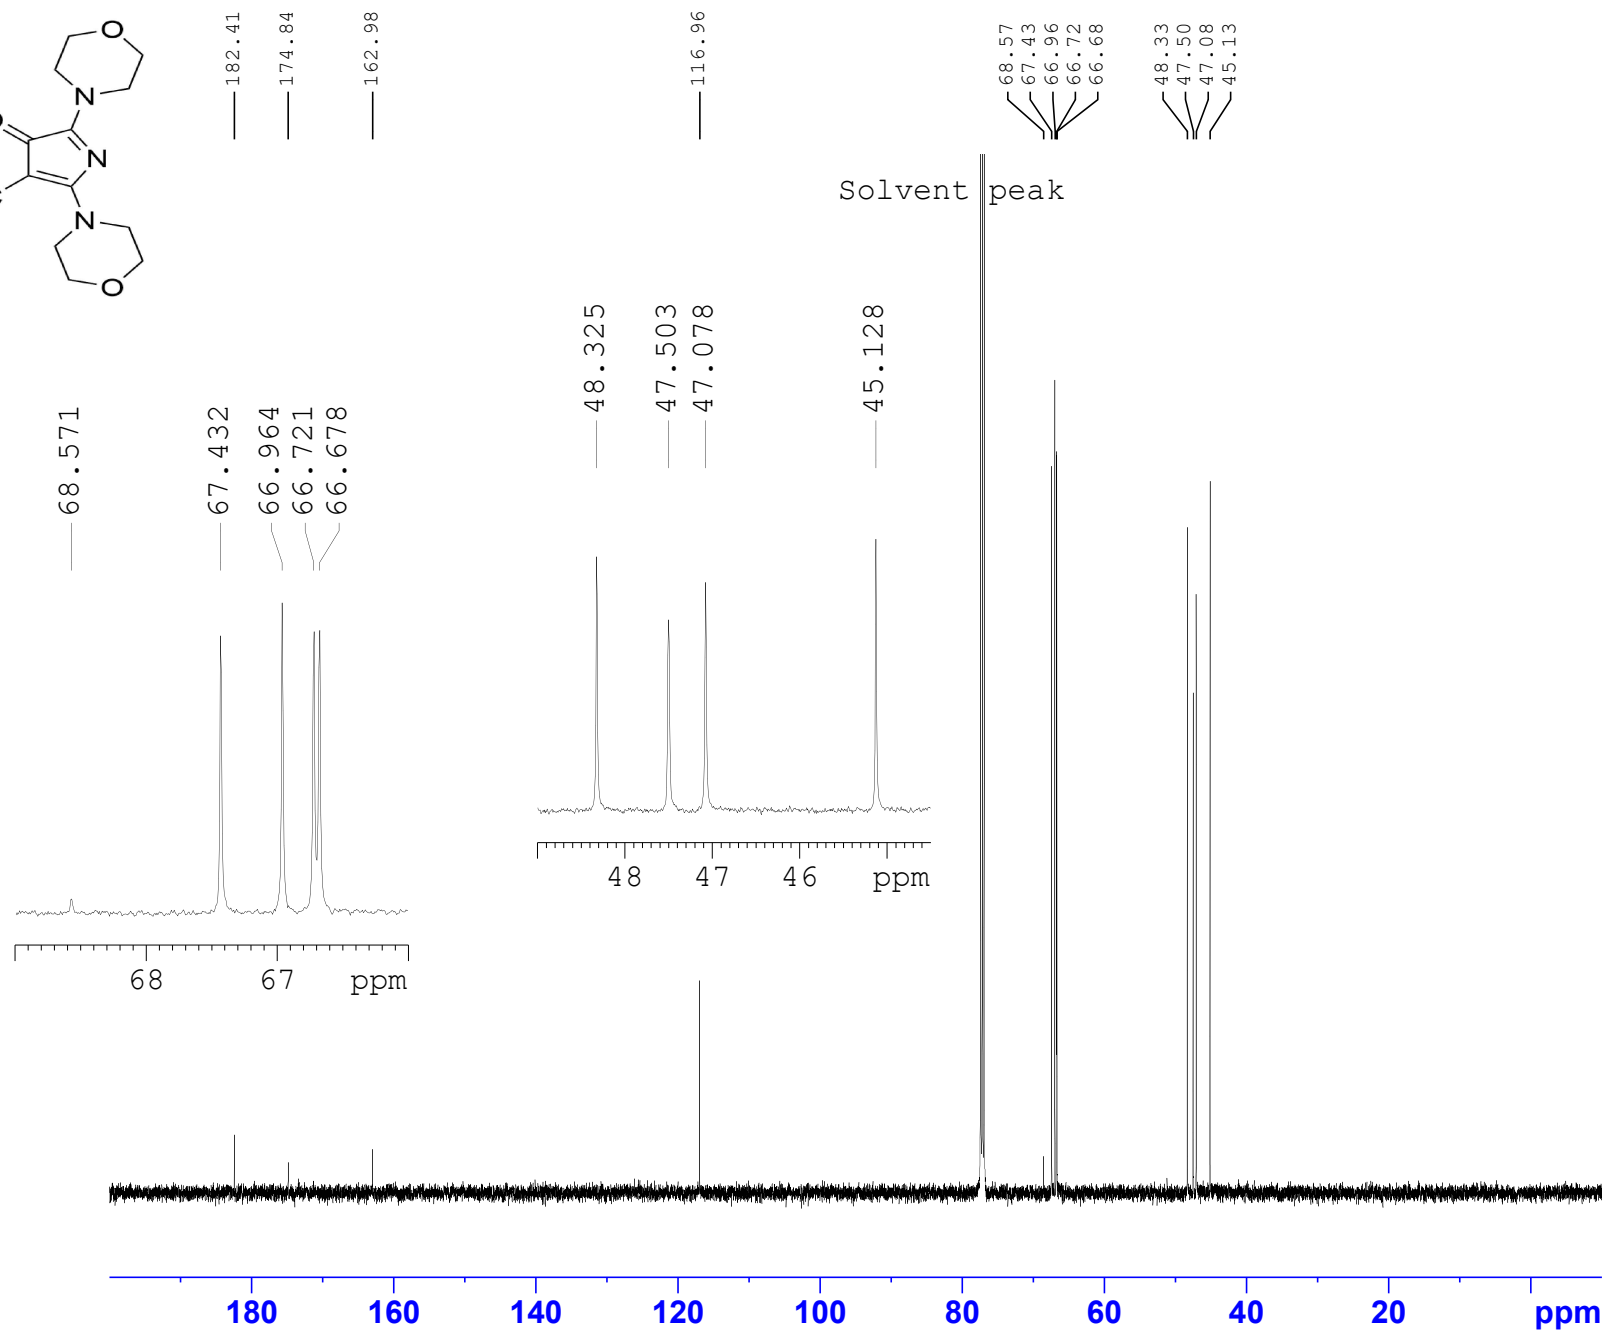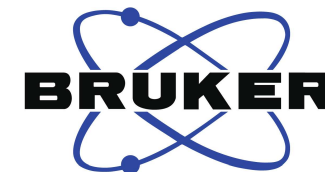

Current Data Parameters  
 NAME nmr 500  
 EXPNO 11  
 PROCNO 1

F2 - Acquisition Parameters  
 Date\_ 20221114  
 Time\_ 11.56 h  
 INSTRUM spect  
 PROBHD z113652\_0078 (  
 PULPROG jmod  
 TD 65536  
 SOLVENT CDCl3  
 NS 20480  
 DS 4  
 SWH 29761.904 Hz  
 FIDRES 0.908261 Hz  
 AQ 1.1010048 sec  
 RG 2050  
 DW 16.800 usec  
 DE 6.50 usec  
 TE 296.3 K  
 CNST2 145.0000000  
 CNST11 1.0000000  
 D1 2.00000000 sec  
 D20 0.00689655 sec  
 TD0 1  
 SFO1 125.7459712 MHz  
 NUC1 13C  
 P1 10.00 usec  
 P2 20.00 usec  
 PLW1 121.36000061 W  
 SFO2 500.0350001 MHz  
 NUC2 1H  
 CPDPRG[2] waltz65  
 PCPD2 80.00 usec  
 PLW2 16.34900093 W  
 PLW12 0.34647381 W

F2 - Processing parameters  
 SI 32768  
 SF 125.7333812 MHz  
 WDW EM  
 SSB 0  
 LB 1.00 Hz  
 GB 0  
 PC 1.40

3,5-Dimorpholino-2-oxo-2H-pyrrole-4-carbonitrile 35

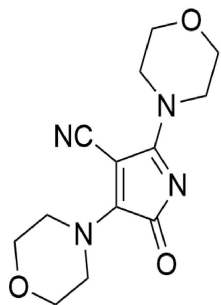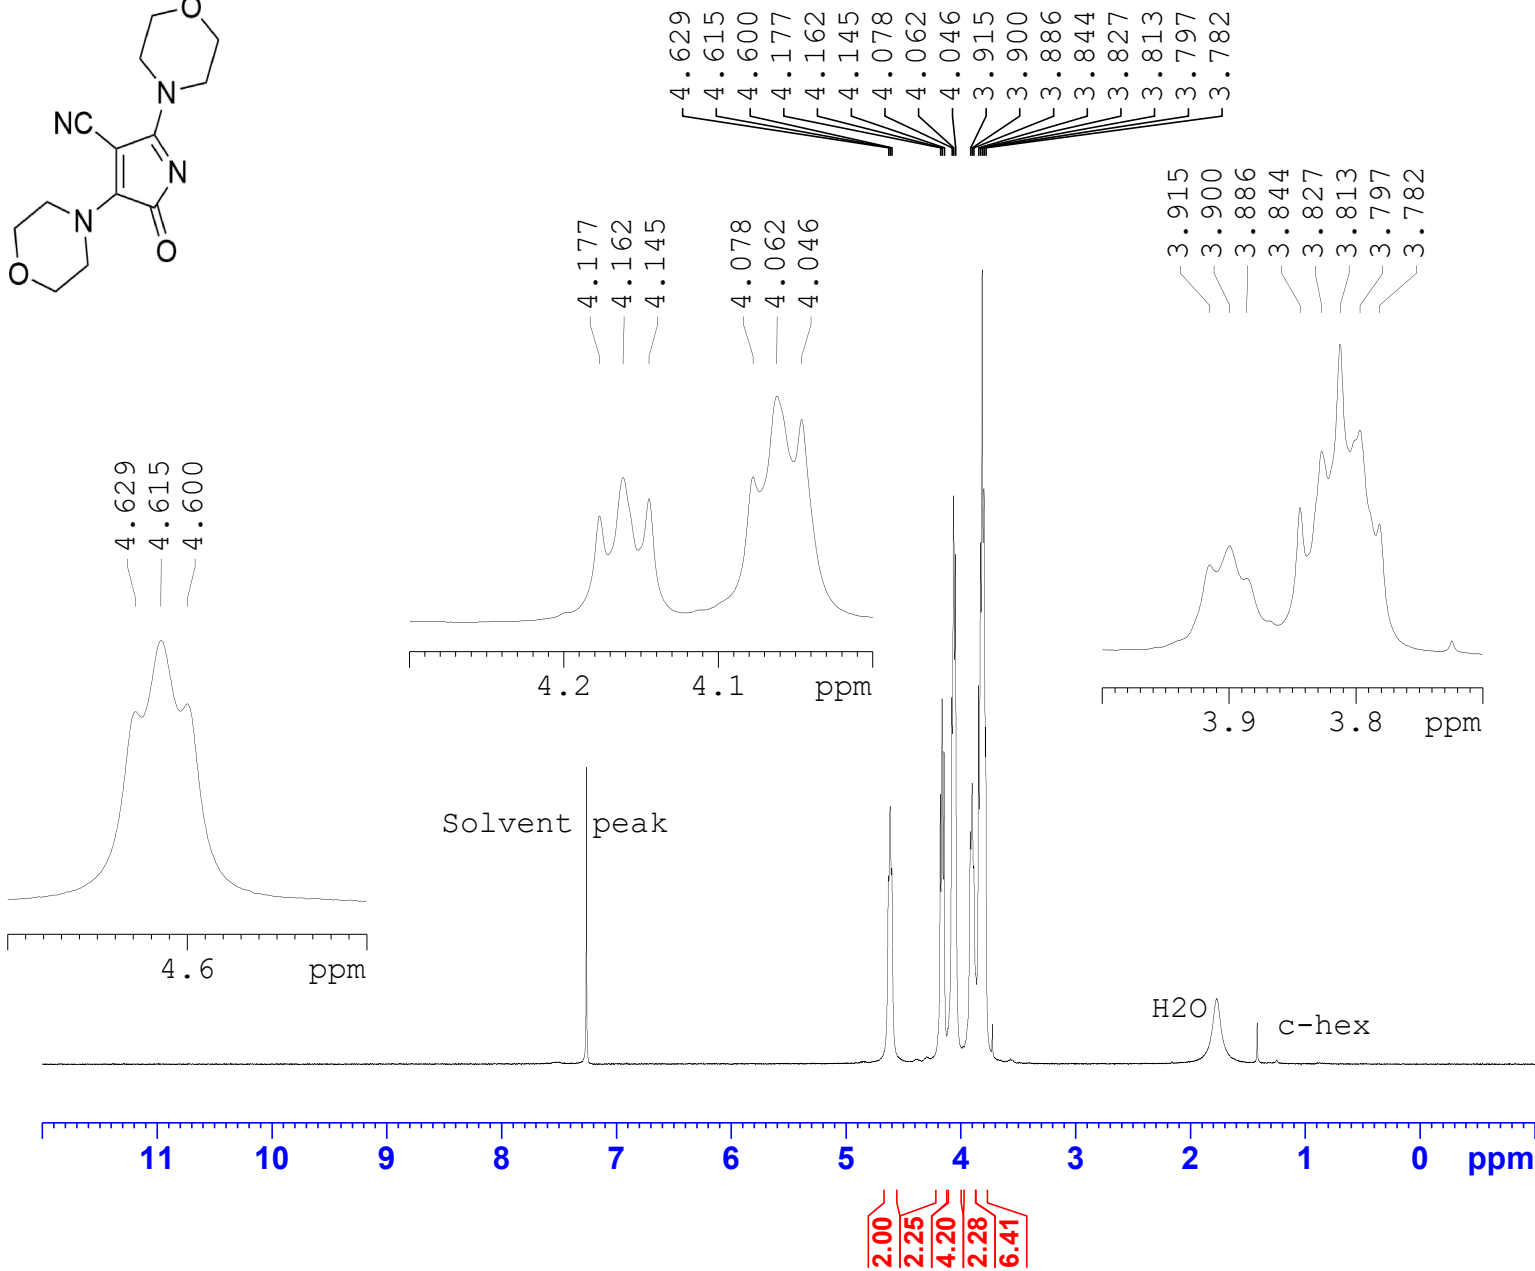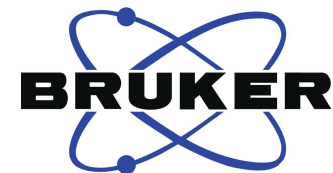

Current Data Parameters  
 NAME NMR 300  
 EXPNO 141  
 PROCNO 1

F2 - Acquisition Parameters  
 Date\_ 20221122  
 Time\_ 21.31 h  
 INSTRUM spect  
 PROBHD Z104275\_0375 ( )  
 PULPROG zg30  
 TD 65536  
 SOLVENT CDCl3  
 NS 16  
 DS 2  
 SWH 6009.615 Hz  
 FIDRES 0.183399 Hz  
 AQ 5.4525952 sec  
 RG 201.81  
 DW 83.200 usec  
 DE 6.50 usec  
 TE 298.0 K  
 D1 1.00000000 sec  
 TD0 1  
 SFO1 300.1318533 MHz  
 NUC1 1H  
 P1 14.00 usec  
 PLW1 7.85570002 W

F2 - Processing parameters  
 SI 65536  
 SF 300.1300073 MHz  
 WDW EM  
 SSB 0  
 LB 0.30 Hz  
 GB 0  
 PC 1.00

3,5-Dimorpholino-2-oxo-2H-pyrrole-4-carbonitrile 35

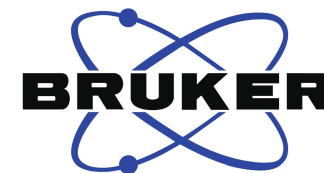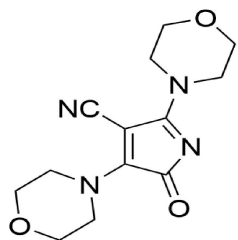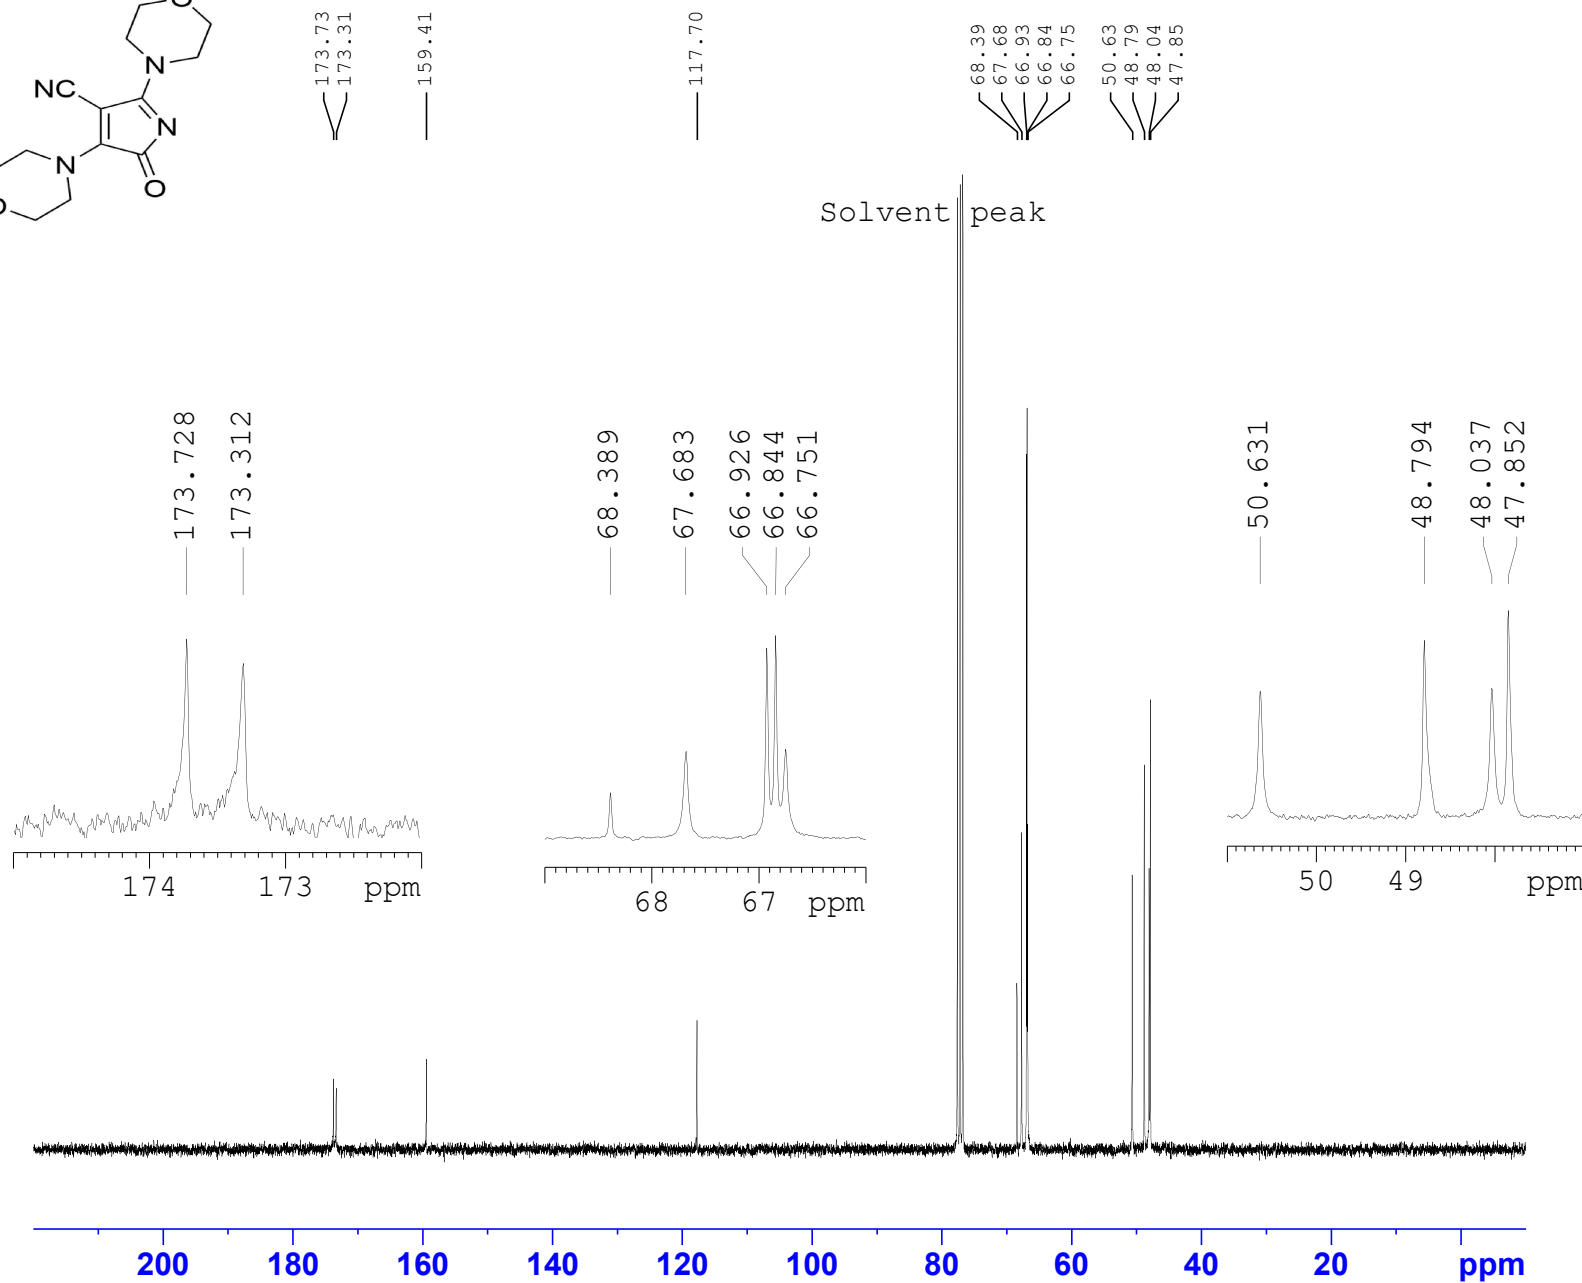

Current Data Parameters  
 NAME NMR 300  
 EXPNO 142  
 PROCNO 1

F2 - Acquisition Parameters  
 Date\_ 20221123  
 Time\_ 8.15 h  
 INSTRUM spect  
 PROBHD z104275\_0375 (  
 PULPROG jmod  
 TD 65536  
 SOLVENT CDC13  
 NS 9890  
 DS 4  
 SWH 18115.941 Hz  
 FIDRES 0.552855 Hz  
 AQ 1.8087935 sec  
 RG 201.81  
 DW 27.600 usec  
 DE 6.50 usec  
 TE 298.1 K  
 CNST2 145.000000  
 CNST11 1.0000000  
 D1 2.0000000 sec  
 D20 0.00689655 sec  
 TD0 1  
 SFO1 75.4752953 MHz  
 NUC1 13C  
 P1 10.00 usec  
 P2 20.00 usec  
 PLW1 43.01699829 W  
 SFO2 300.1312005 MHz  
 NUC2 1H  
 CPDPRG[2] waltz16  
 PCPD2 80.00 usec  
 PLW2 7.85570002 W  
 PLW12 0.24640390 W

F2 - Processing parameters  
 SI 32768  
 SF 75.4677399 MHz  
 WDW EM  
 SSB 0  
 LB 1.00 Hz  
 GB 0  
 PC 1.40
